# Supplementary material for: Synthesis of unsymmetrical urea from aryl- or pyridyl carboxamides and aminopyridines using PhI(OAc)2via in situ formation of aryl- or pyridyl isocyanates
Source: Royal Society of Chemistry journal article supplement (doi:10.1039/d1nj03160k), 2021-01-01

## Supporting Information

### Synthesis of unsymmetrical urea from aryl- or pyridyl carboxamides and aminopyridines using $\text{PhI}(\text{OAc})_2$ via *in situ* formation of aryl- or pyridyl isocyanates

*Joydev K. Laha\**, *Neha Singh* and *Mandeep Kaur Hunjan*

*Department of Pharmaceutical Technology (Process Chemistry),*

*National Institute of Pharmaceutical Education and Research,*

*S. A. S. Nagar, Punjab 160062,*

*India*

## Table of Contents

|                                                  |    |
|--------------------------------------------------|----|
| I. $^1\text{H}$ and $^{13}\text{C}$ SPECTRA..... | 2  |
| II. X-ray Data.....                              | 74 |

# I. <sup>1</sup>H and <sup>13</sup>C SPECTRA:

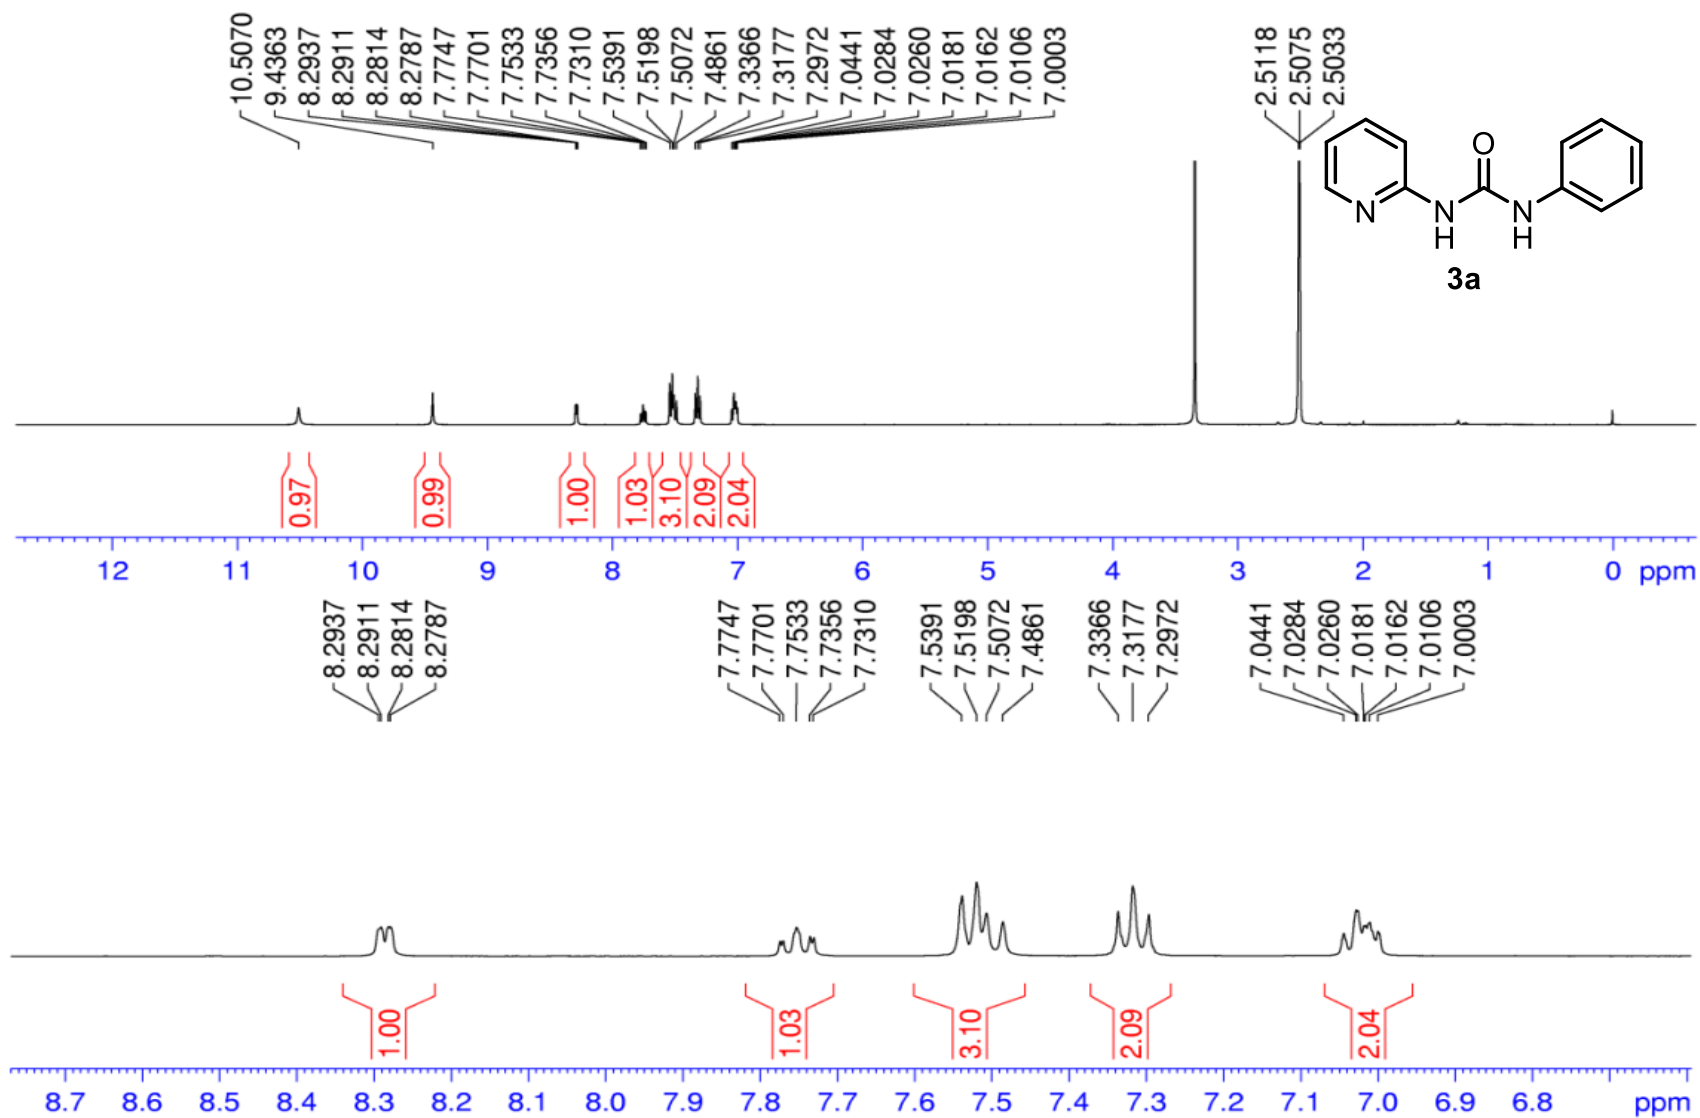

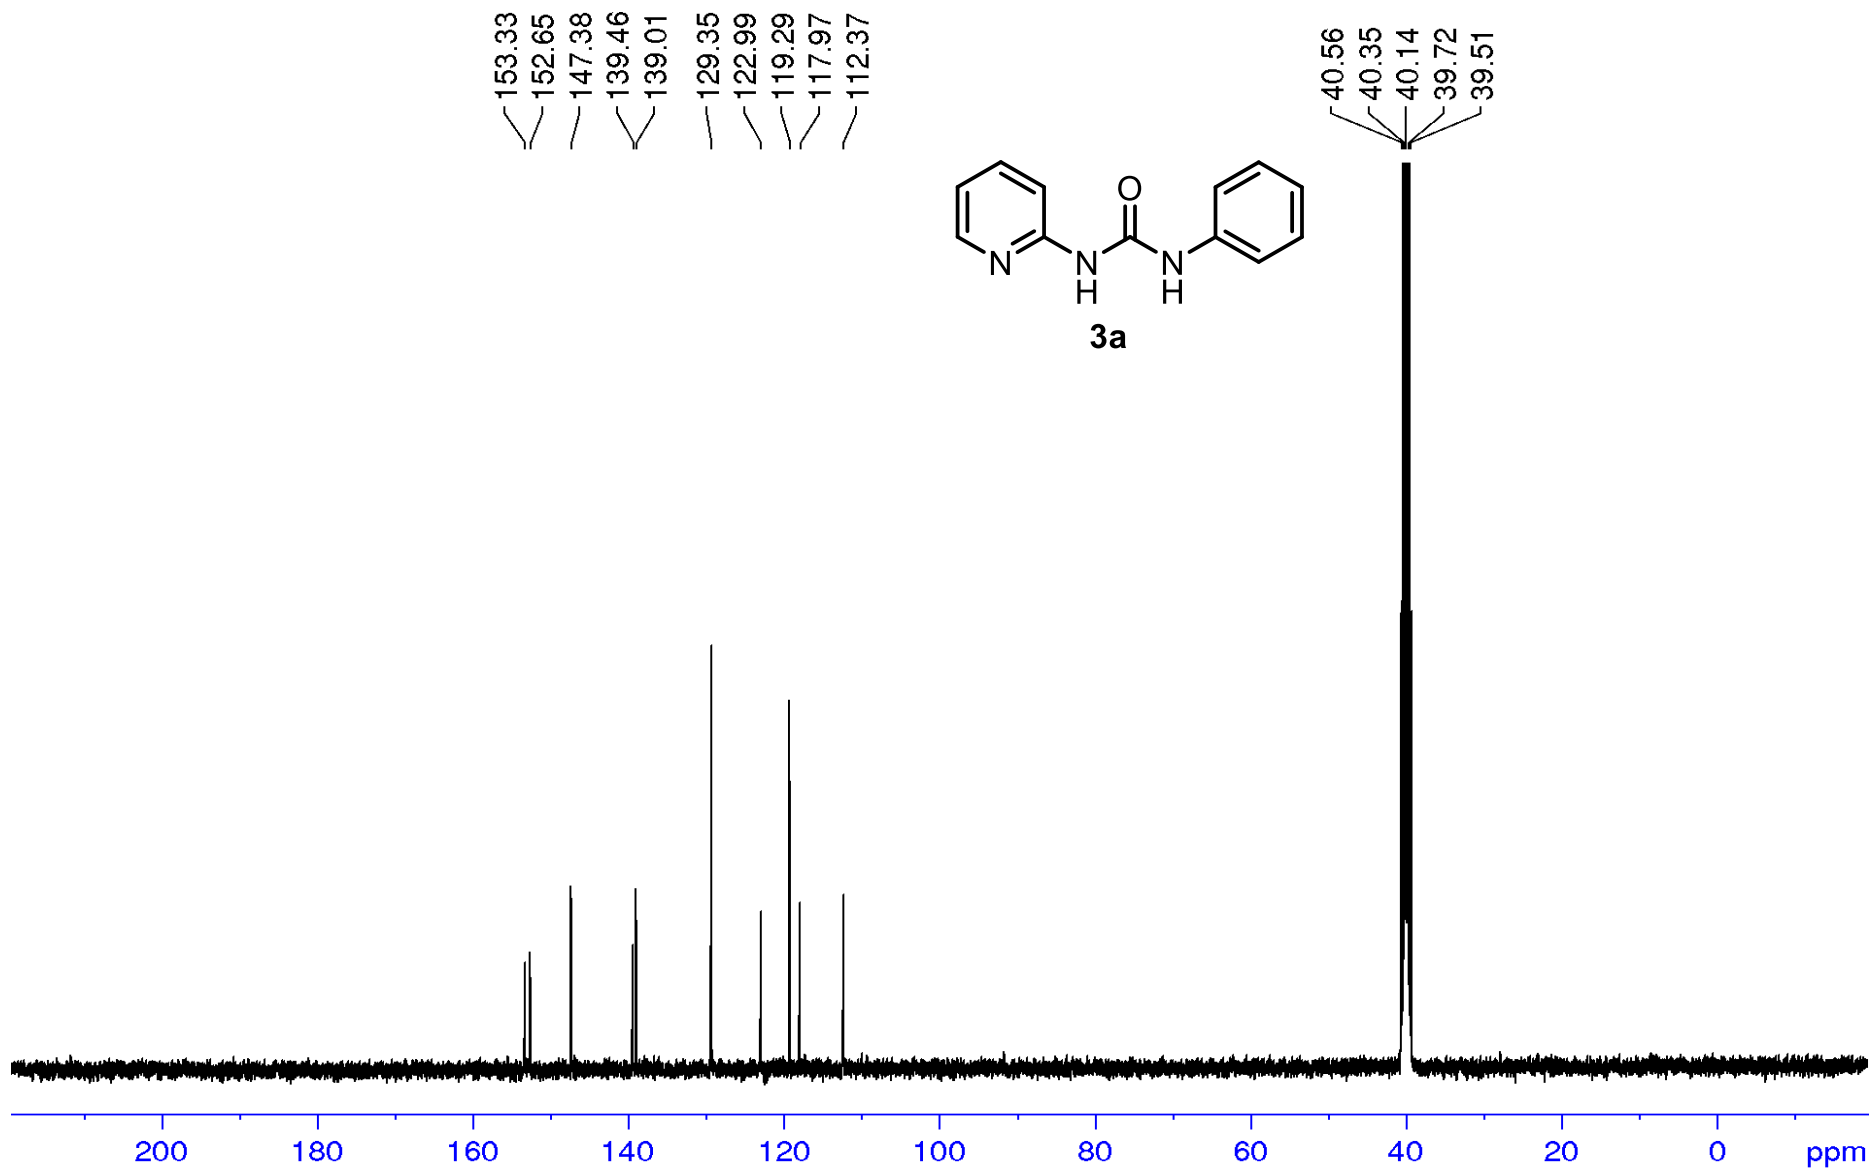

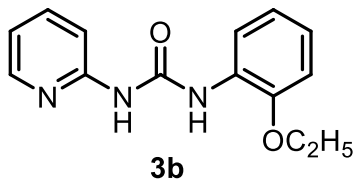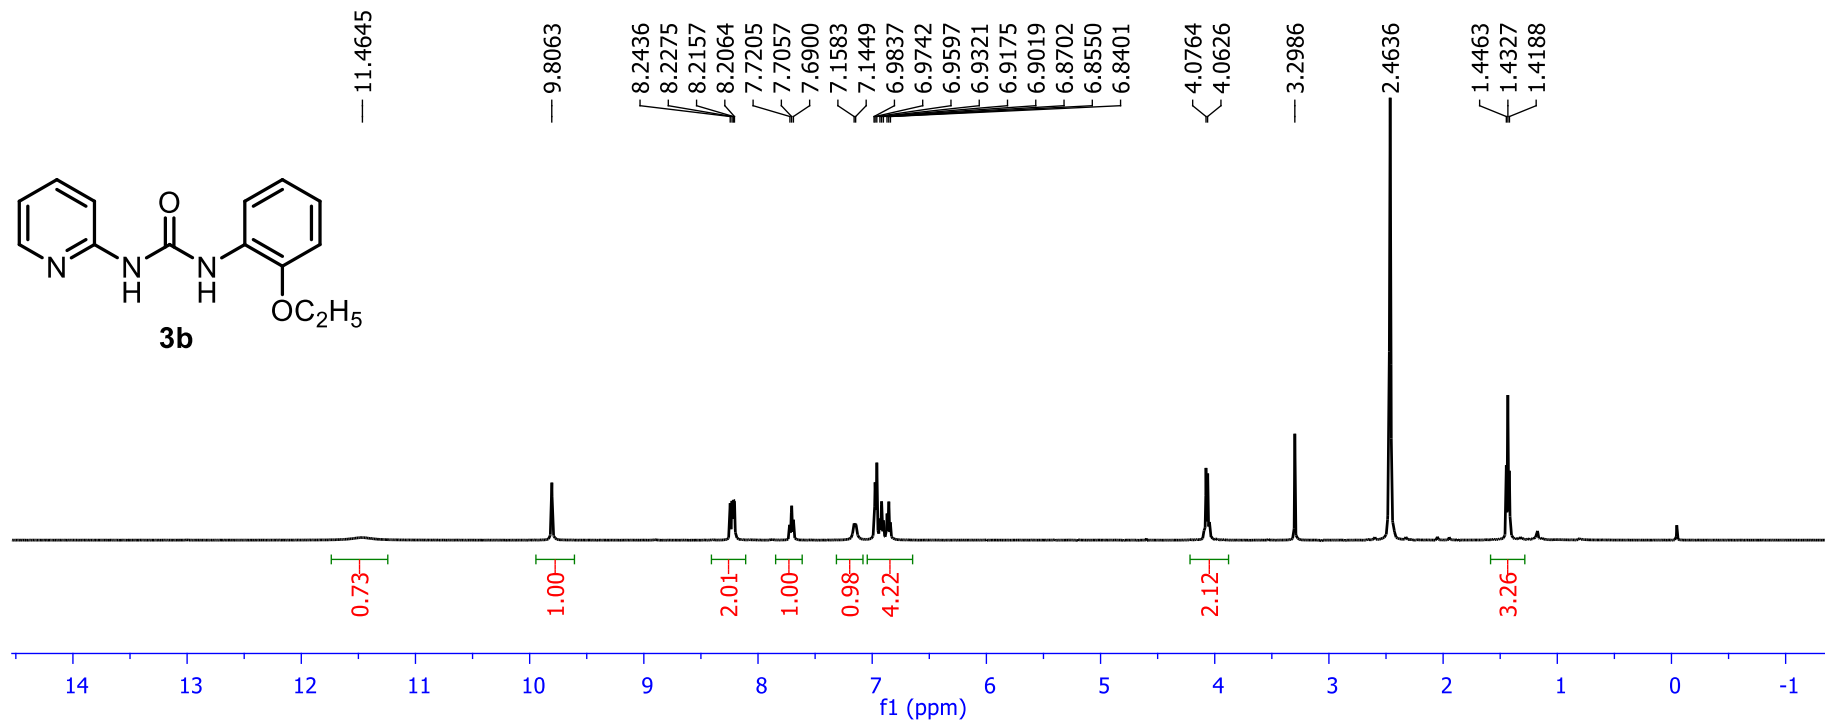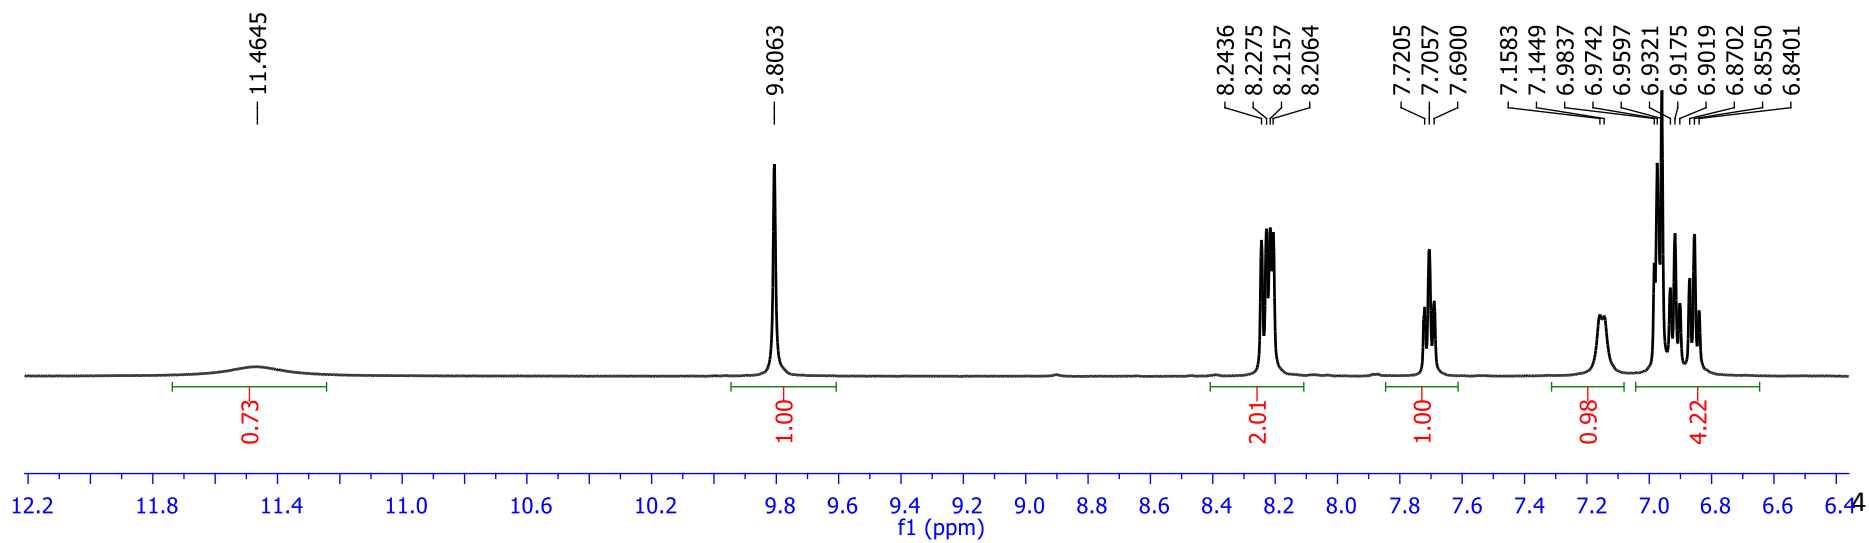

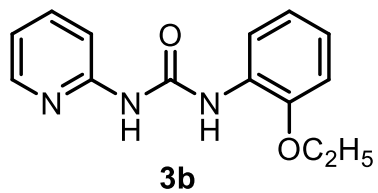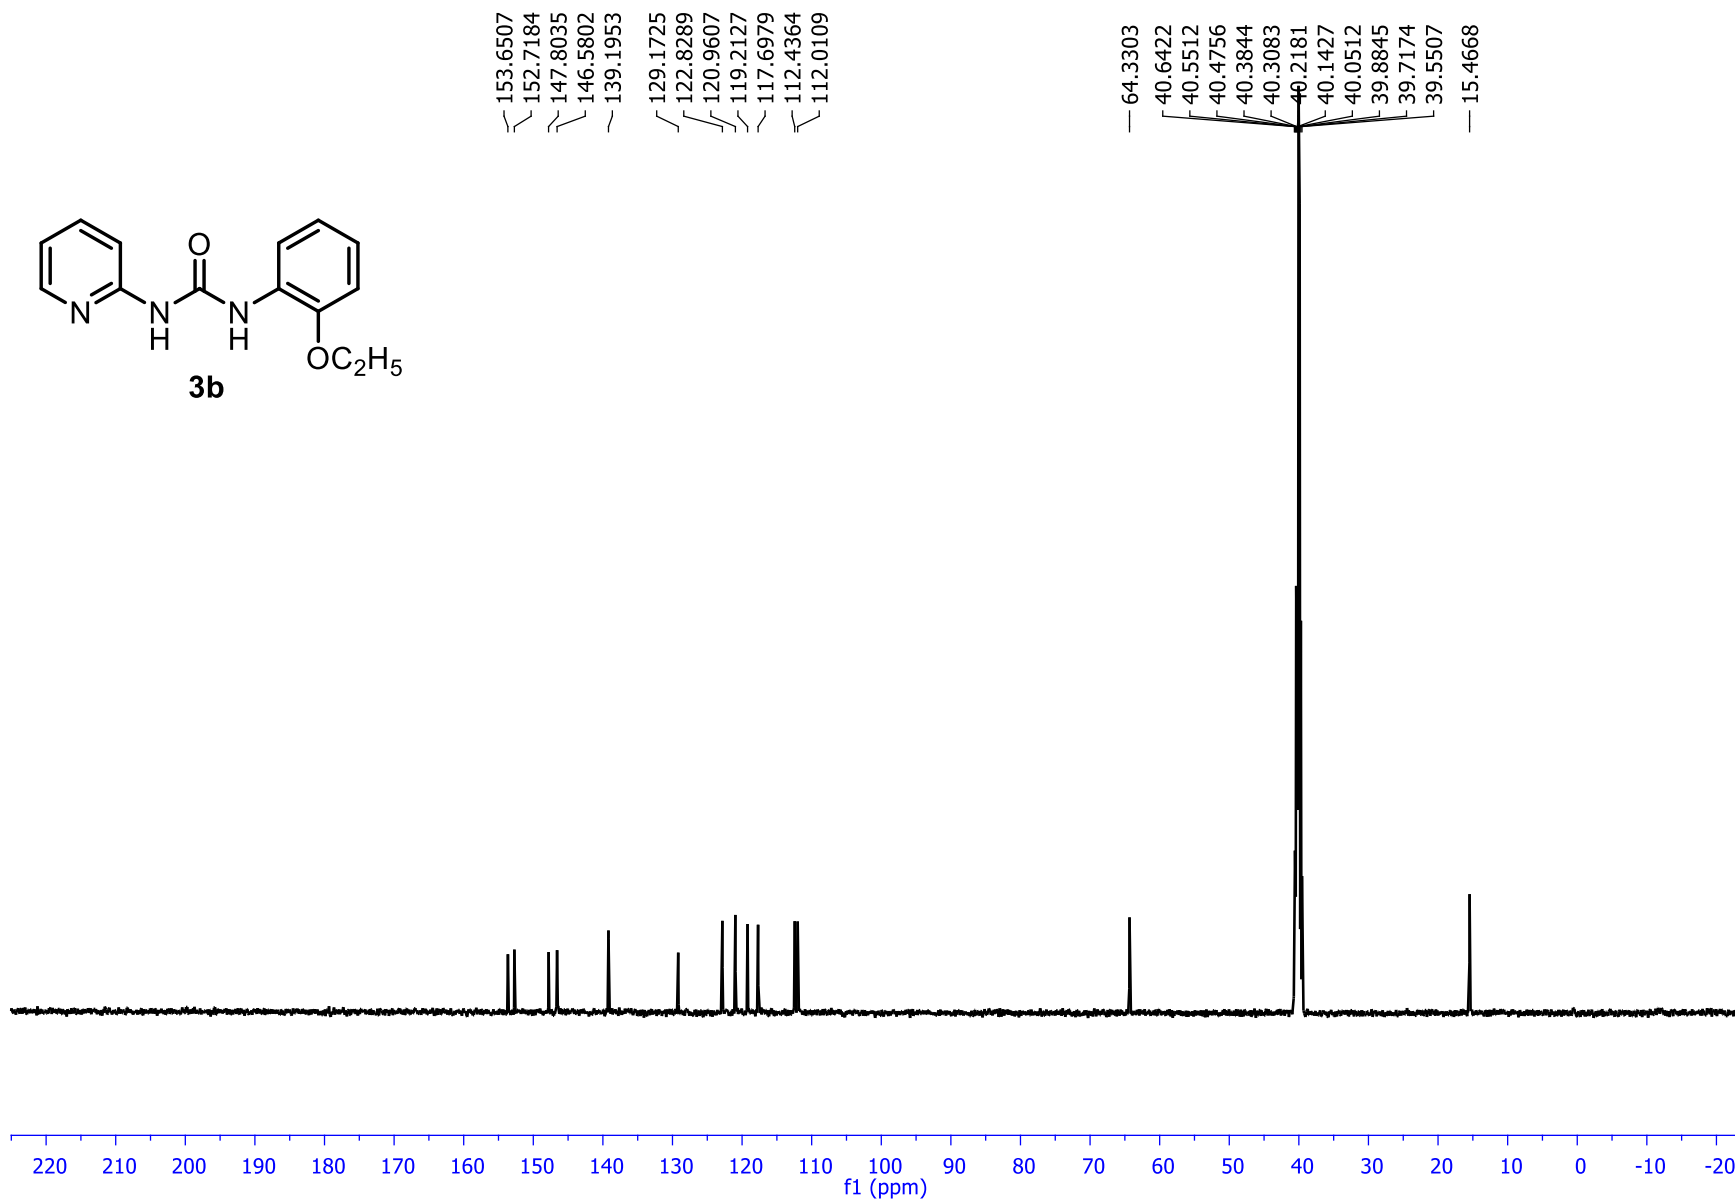

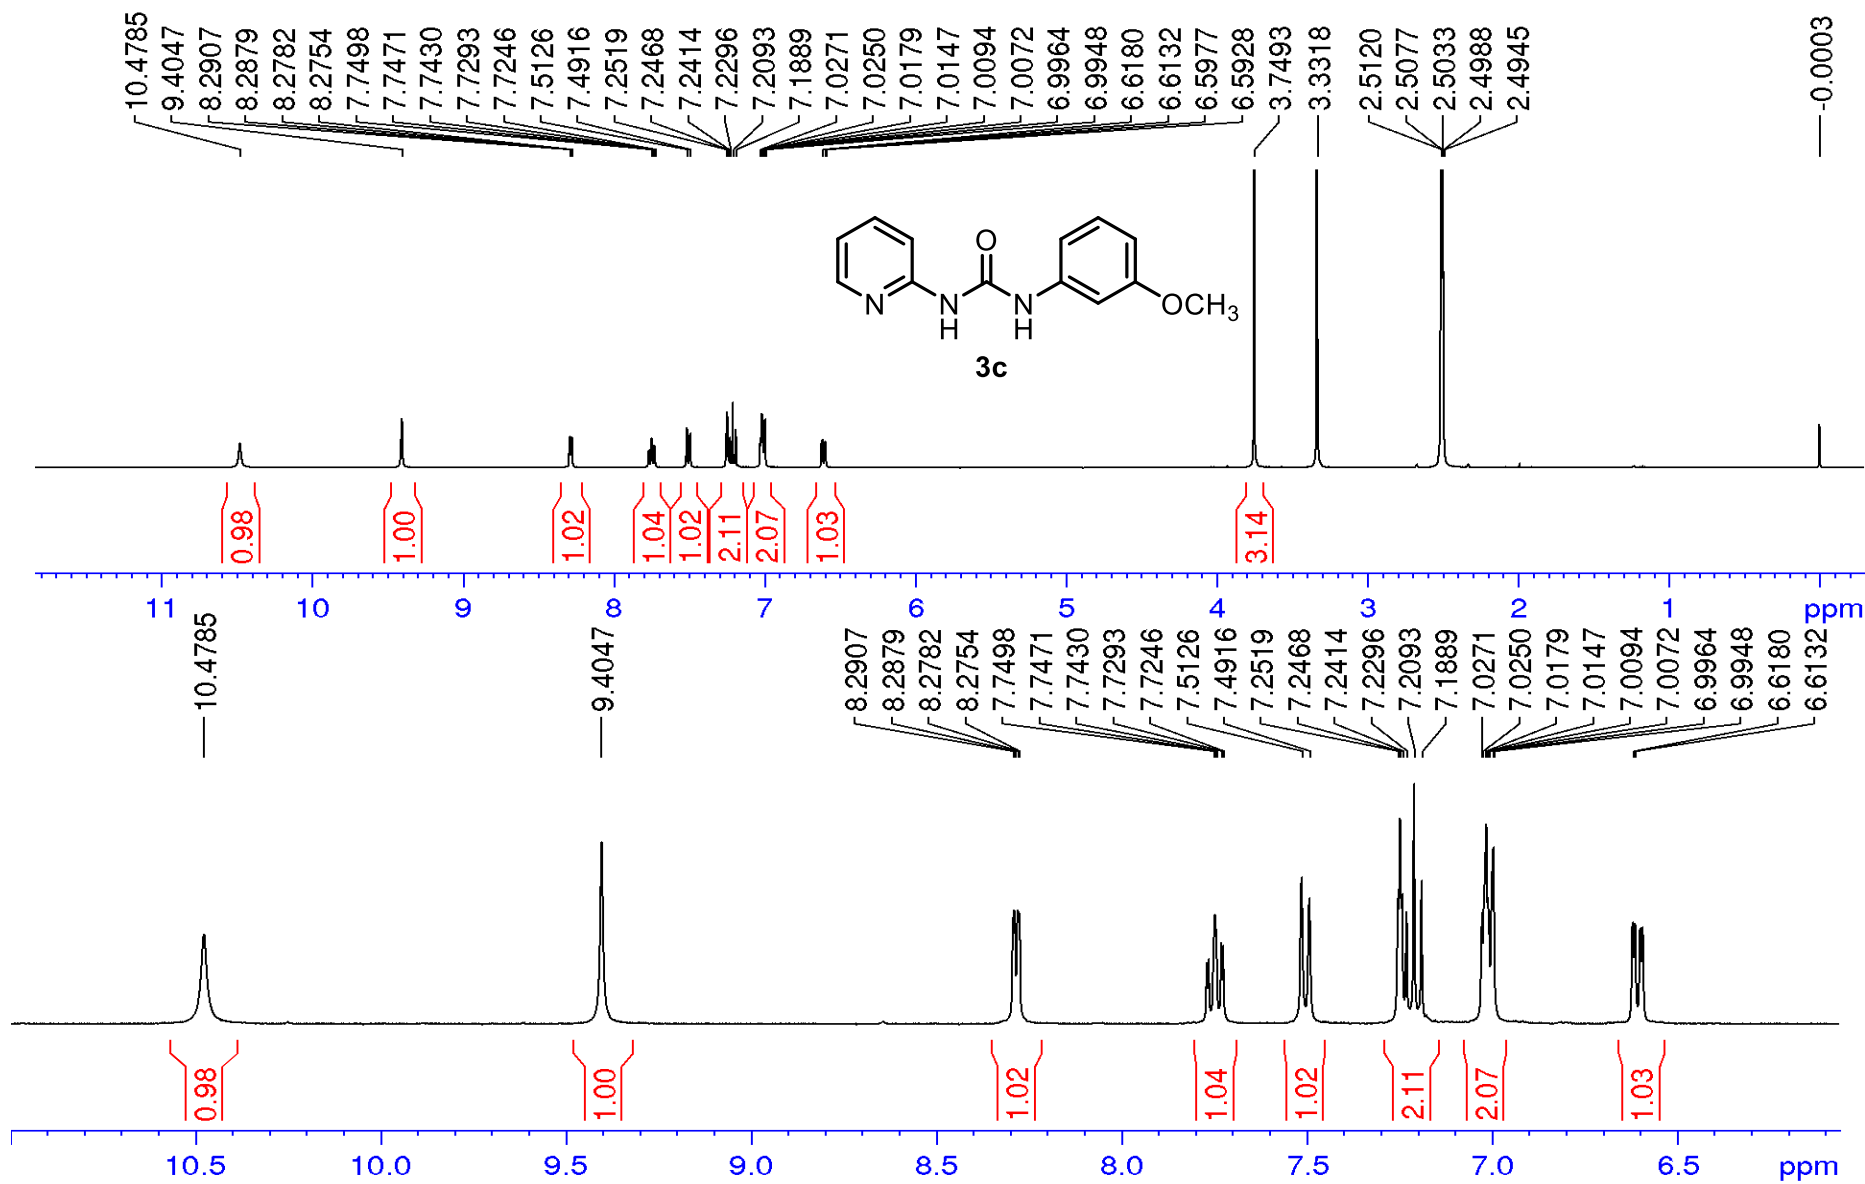

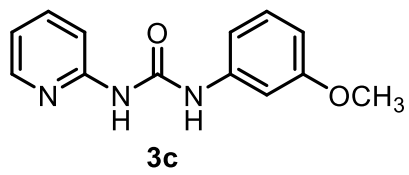

160.21  
153.29  
152.57  
147.41  
140.69  
139.01  
130.12  
118.01  
112.38  
111.59  
108.35  
105.08

55.48  
40.58  
40.37  
40.16  
39.95  
39.75  
39.54  
39.33

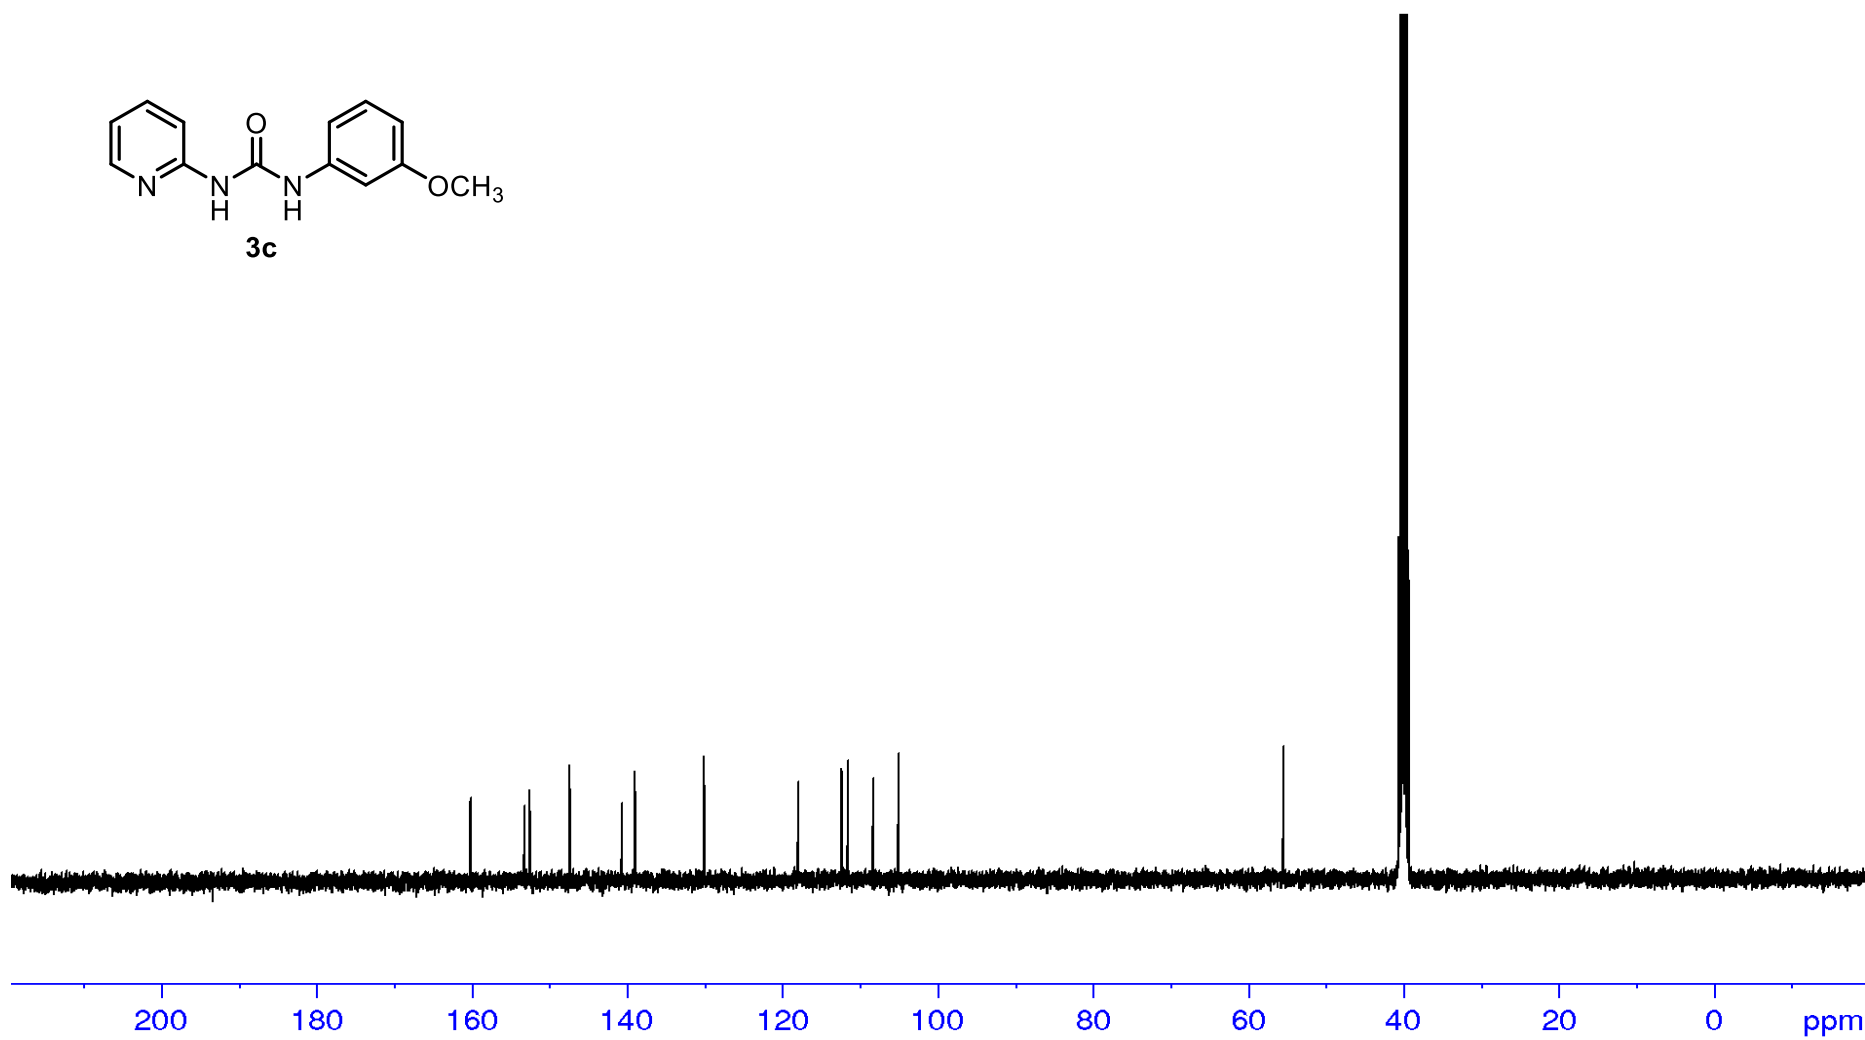

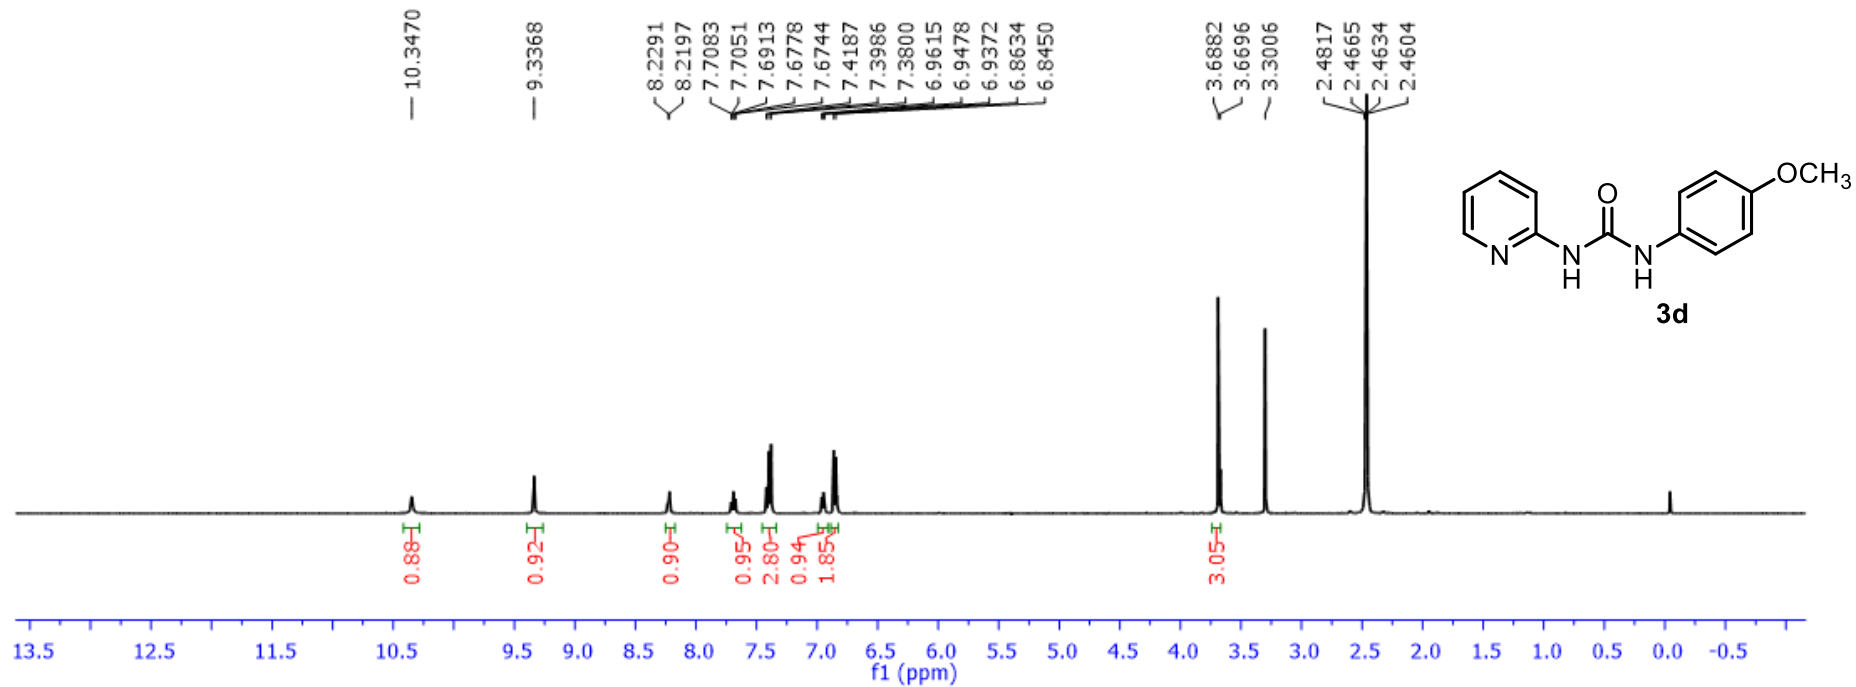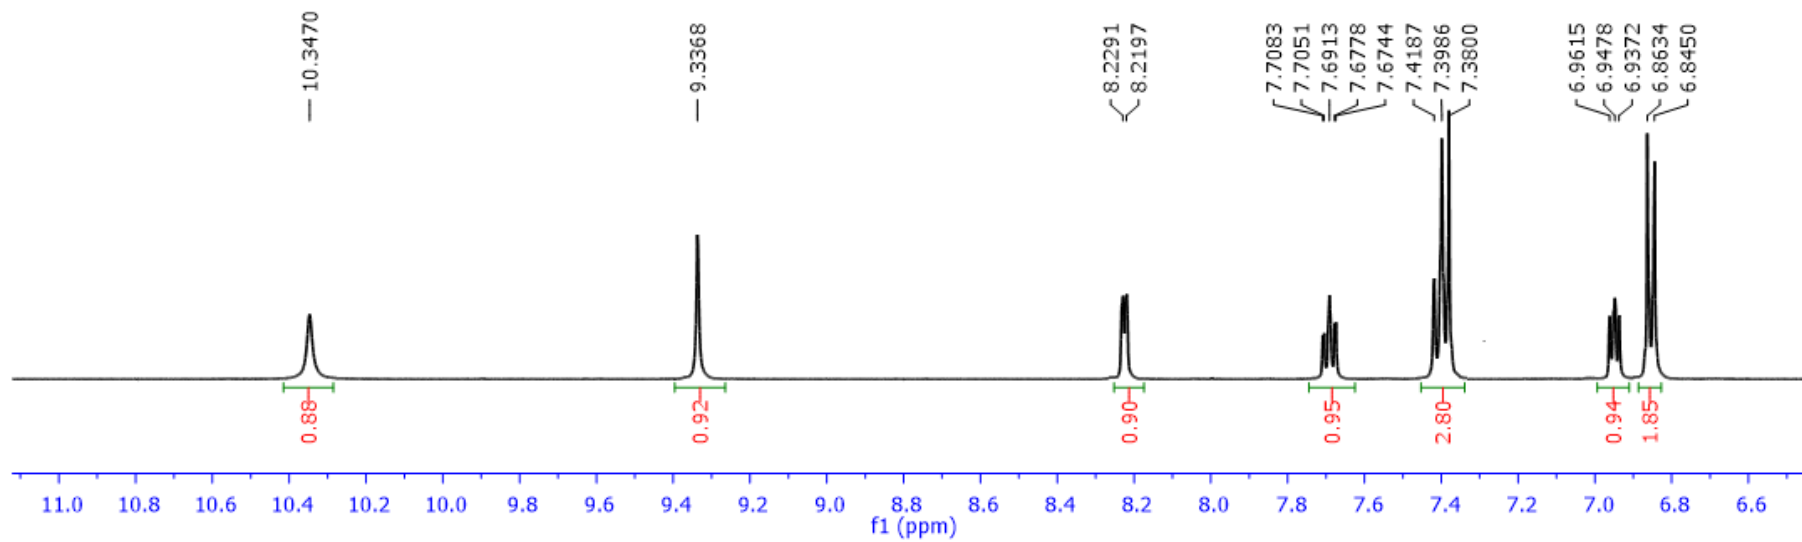



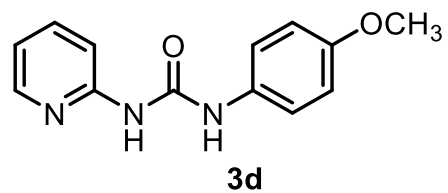

155.39  
153.41  
152.82  
147.27  
138.99  
132.35  
121.18  
120.52  
117.83  
114.52  
114.42  
112.31

55.65  
40.41  
40.20  
39.99  
39.78  
39.57  
39.36  
39.15

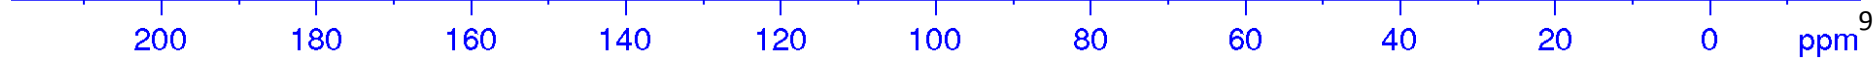

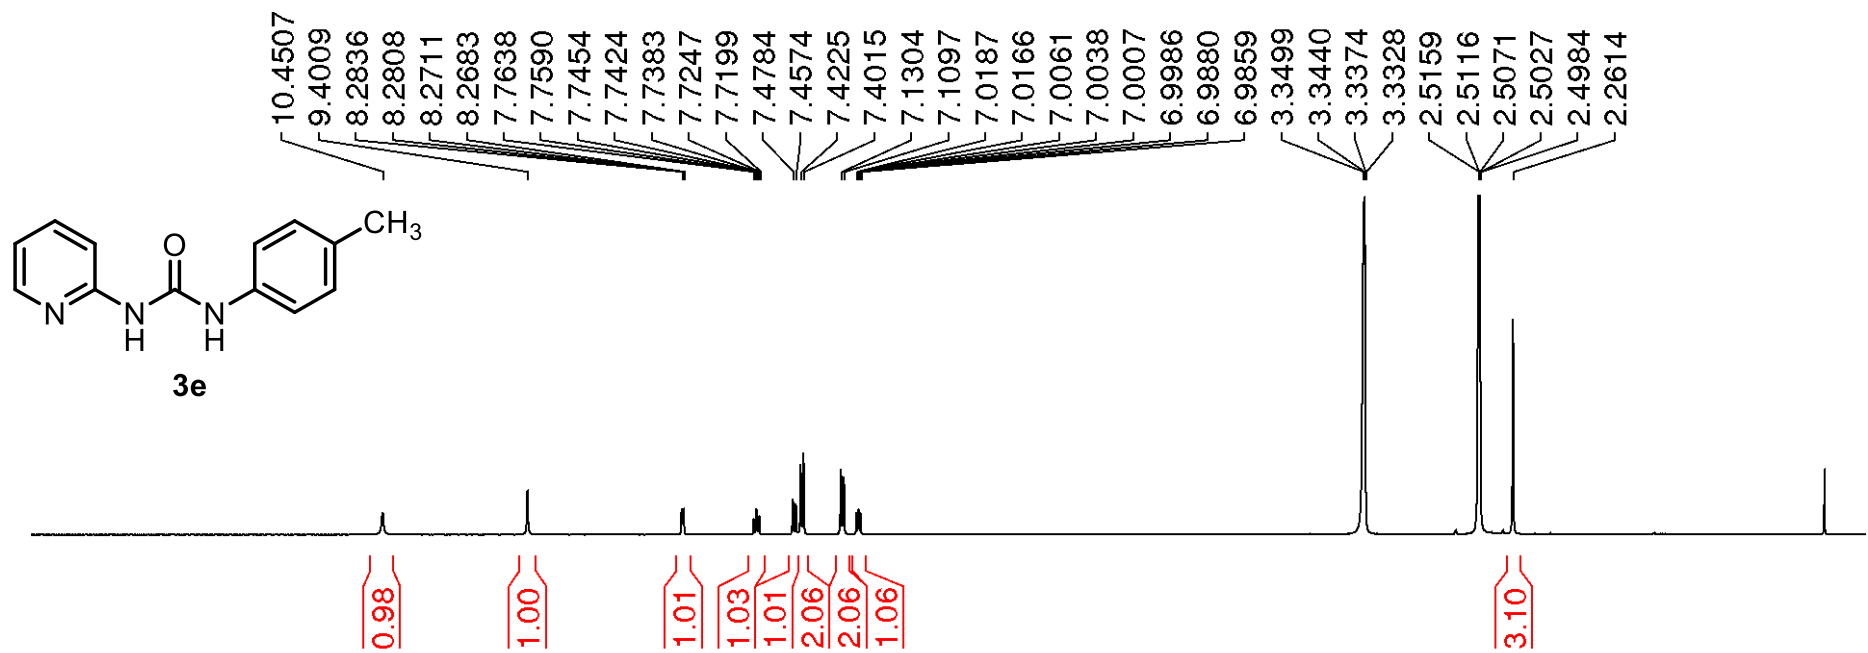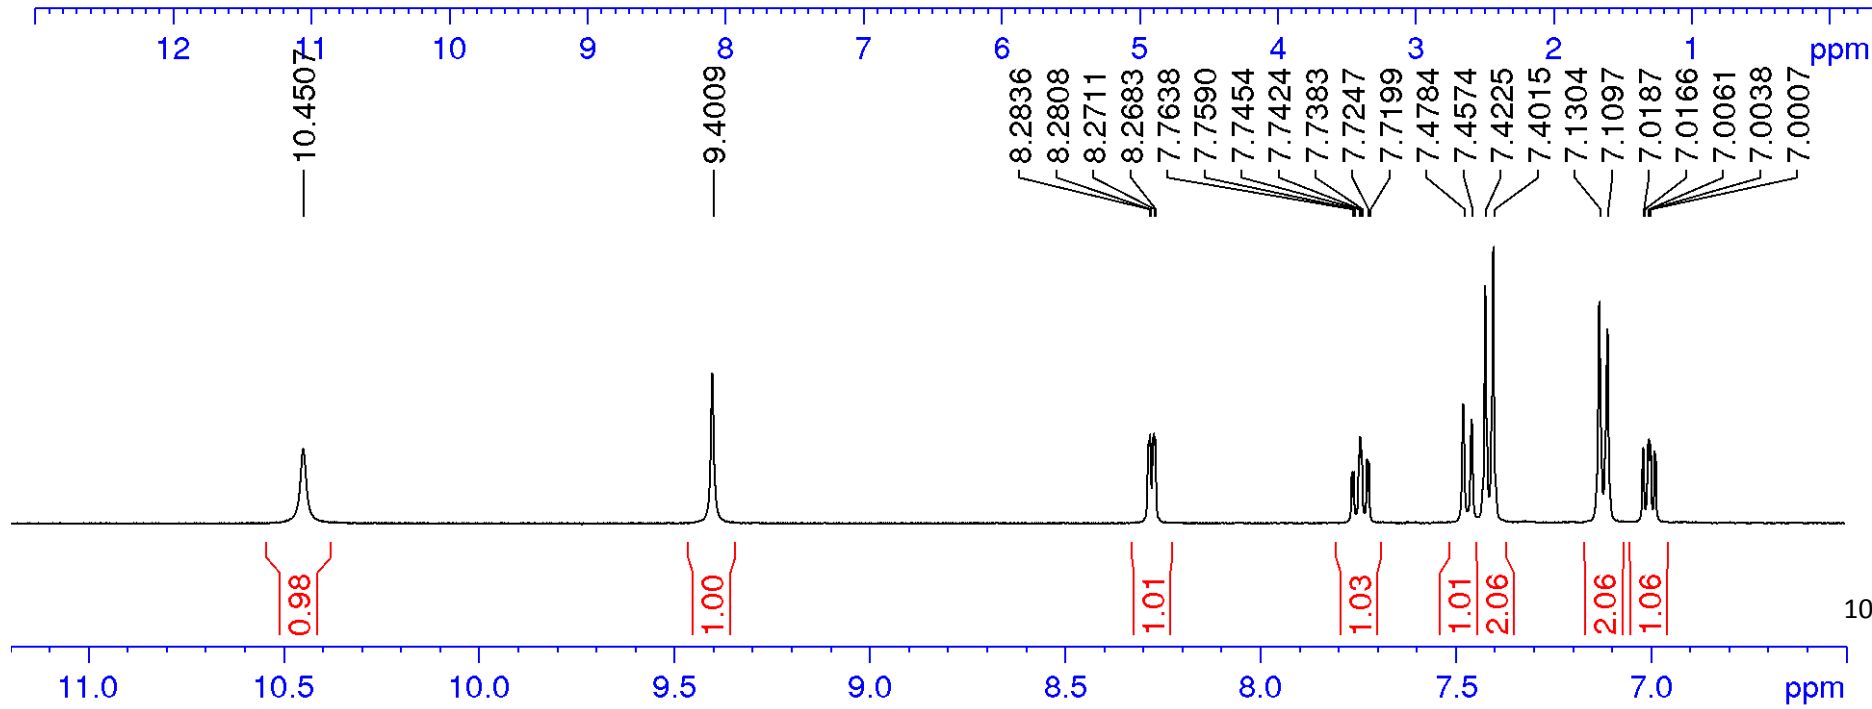

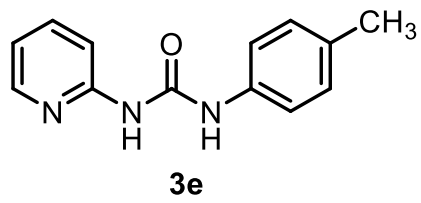

158.29  
155.23  
153.41  
152.65  
147.32  
138.98  
136.90  
131.86  
129.73  
119.33  
117.86  
112.32

40.57  
40.36  
40.15  
39.94  
39.74  
39.53  
39.32  
24.81  
20.82

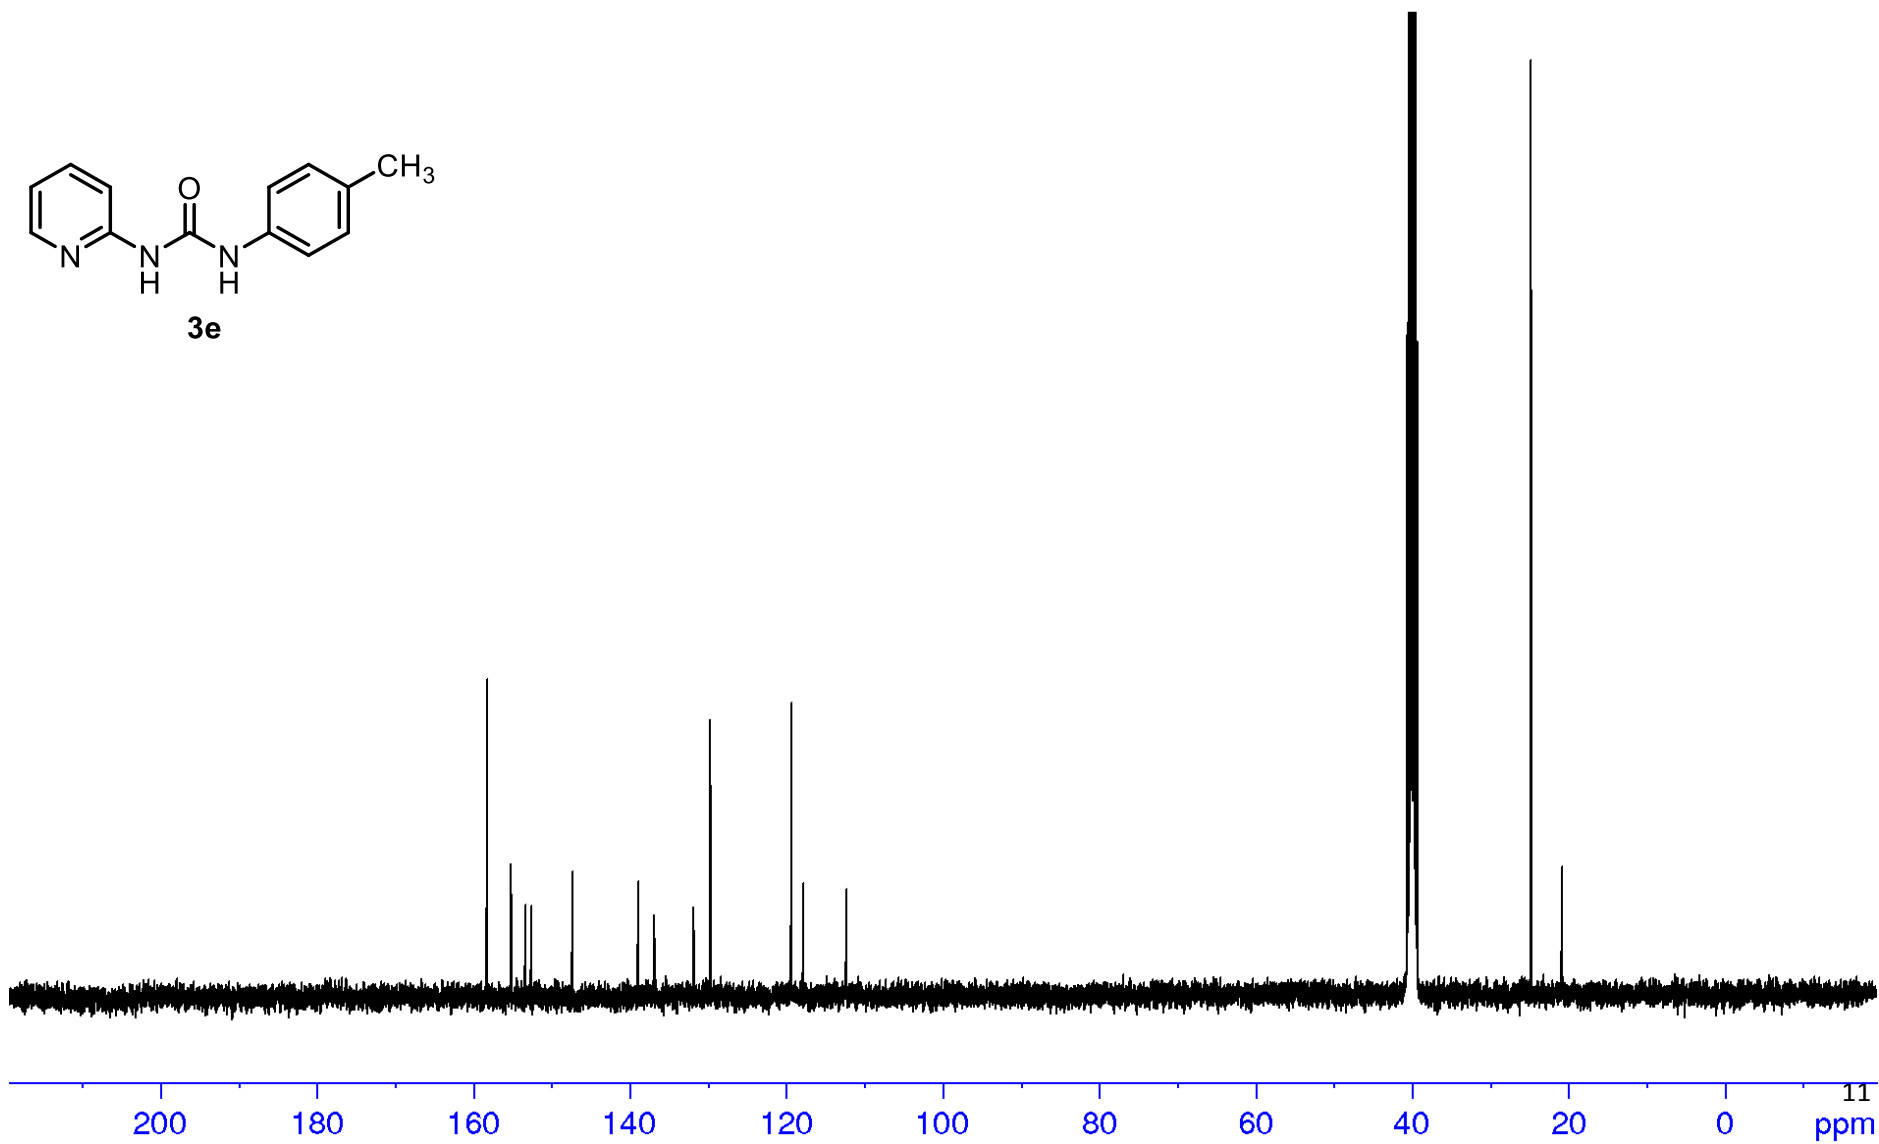

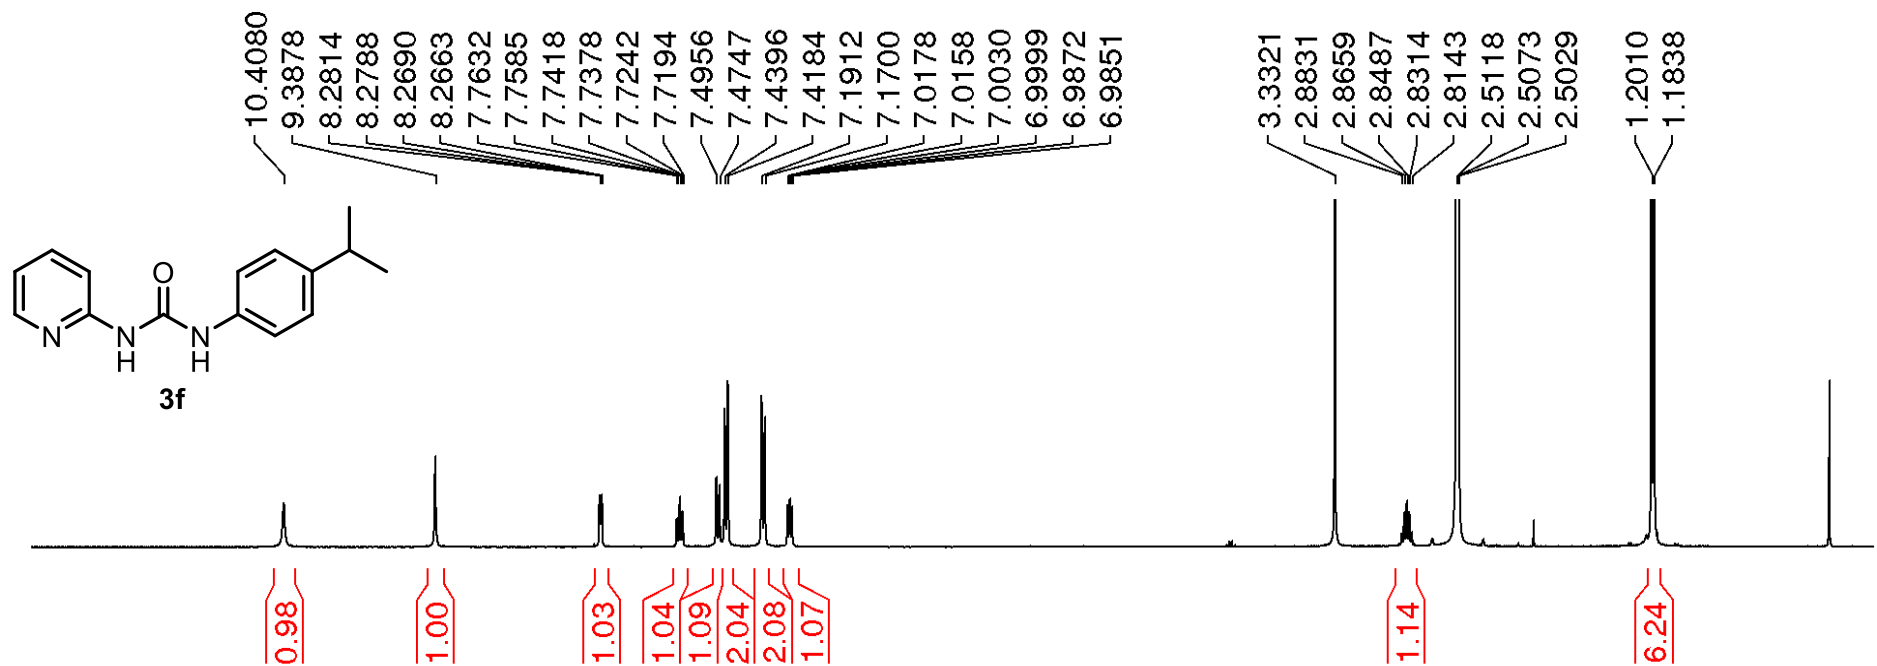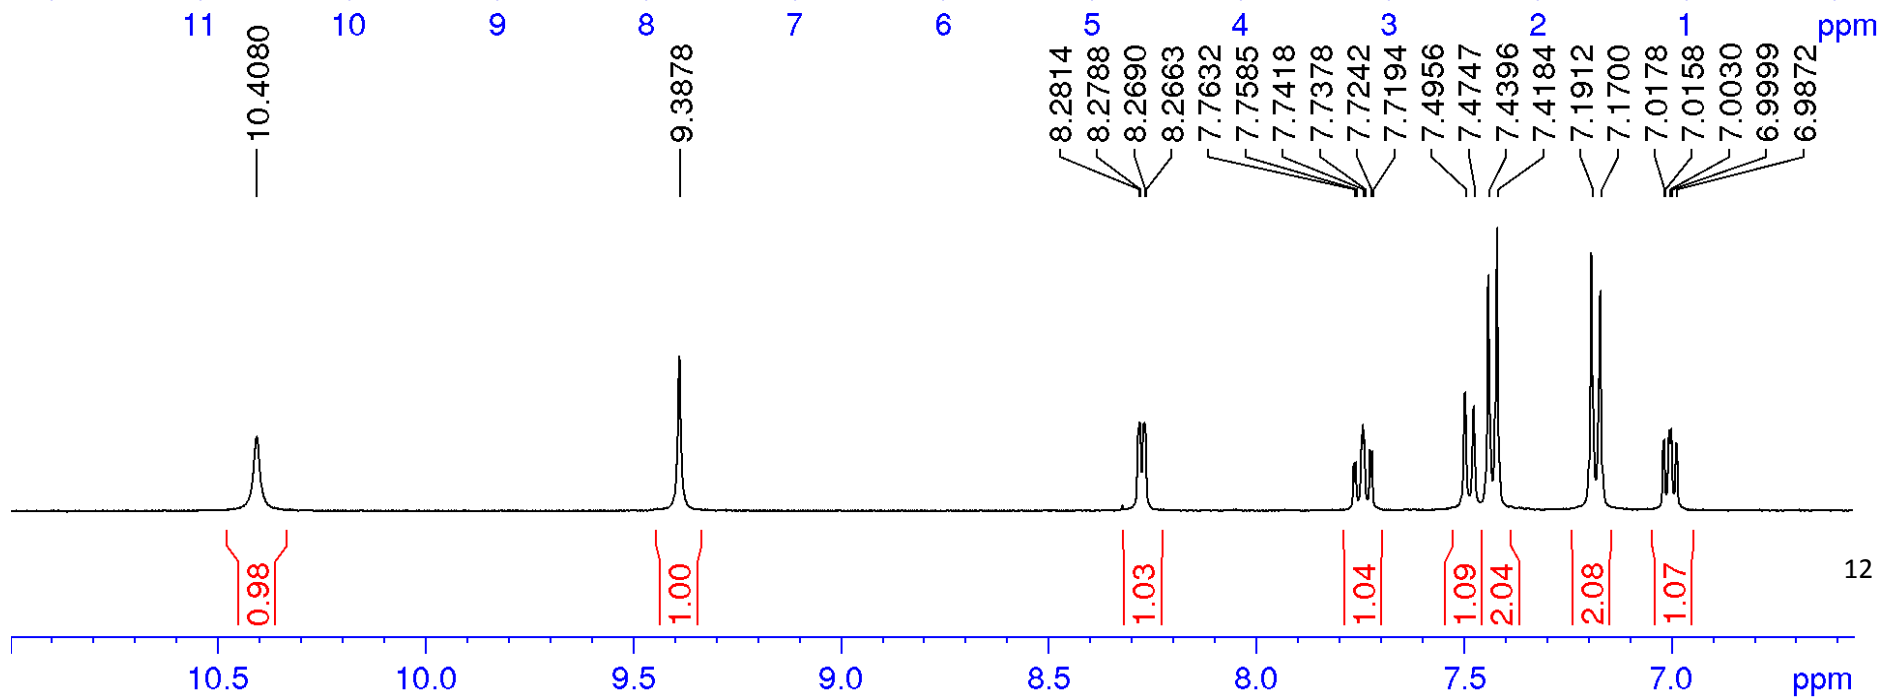

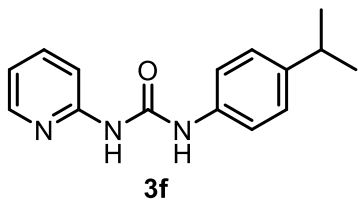

153.40  
152.66  
147.34  
143.07  
138.96  
137.14  
127.04  
119.46  
117.86  
112.33

79.74  
79.61  
79.41  
79.07

40.55  
40.34  
40.13  
39.92  
39.71  
39.51  
39.30  
33.27  
24.46

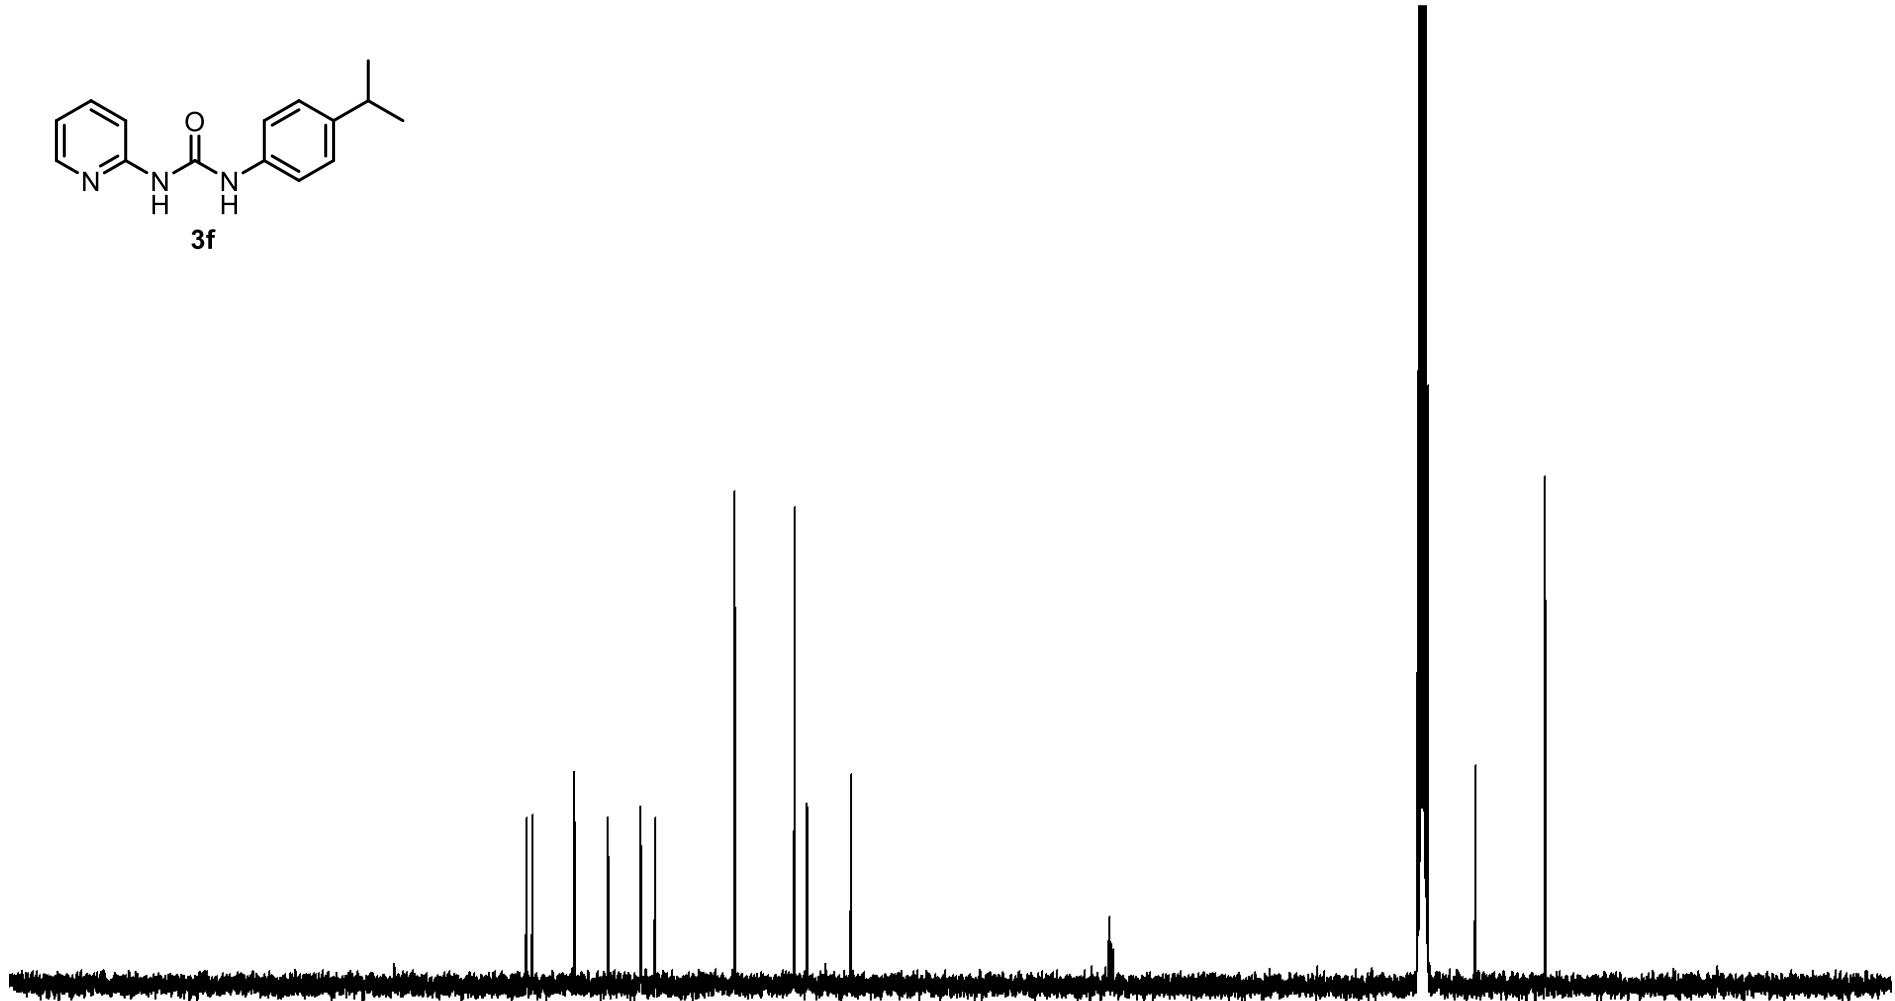

200 180 160 140 120 100 80 60 40 20 0 ppm

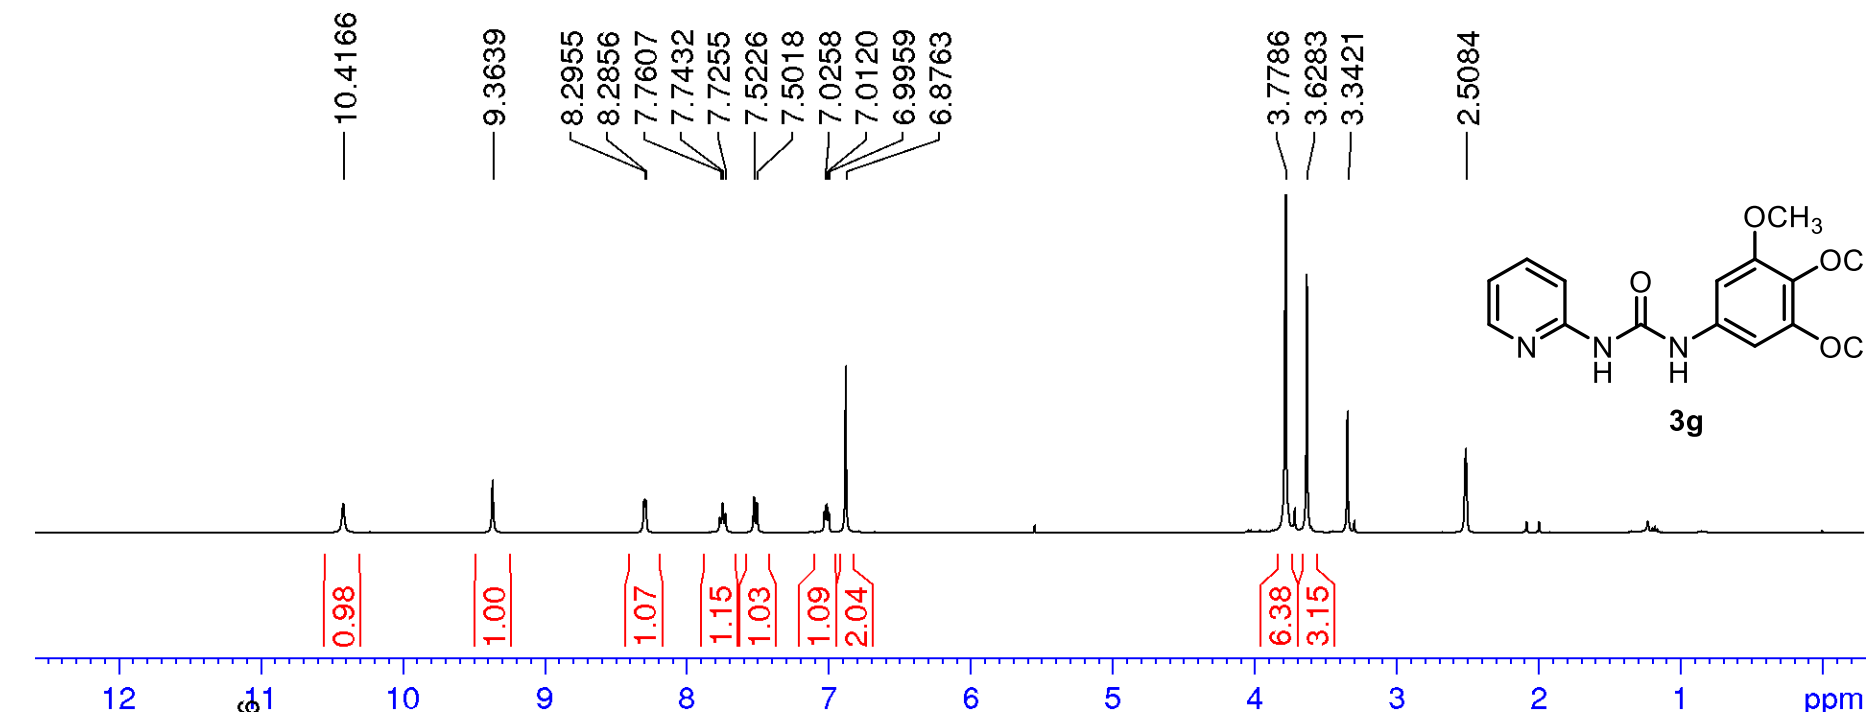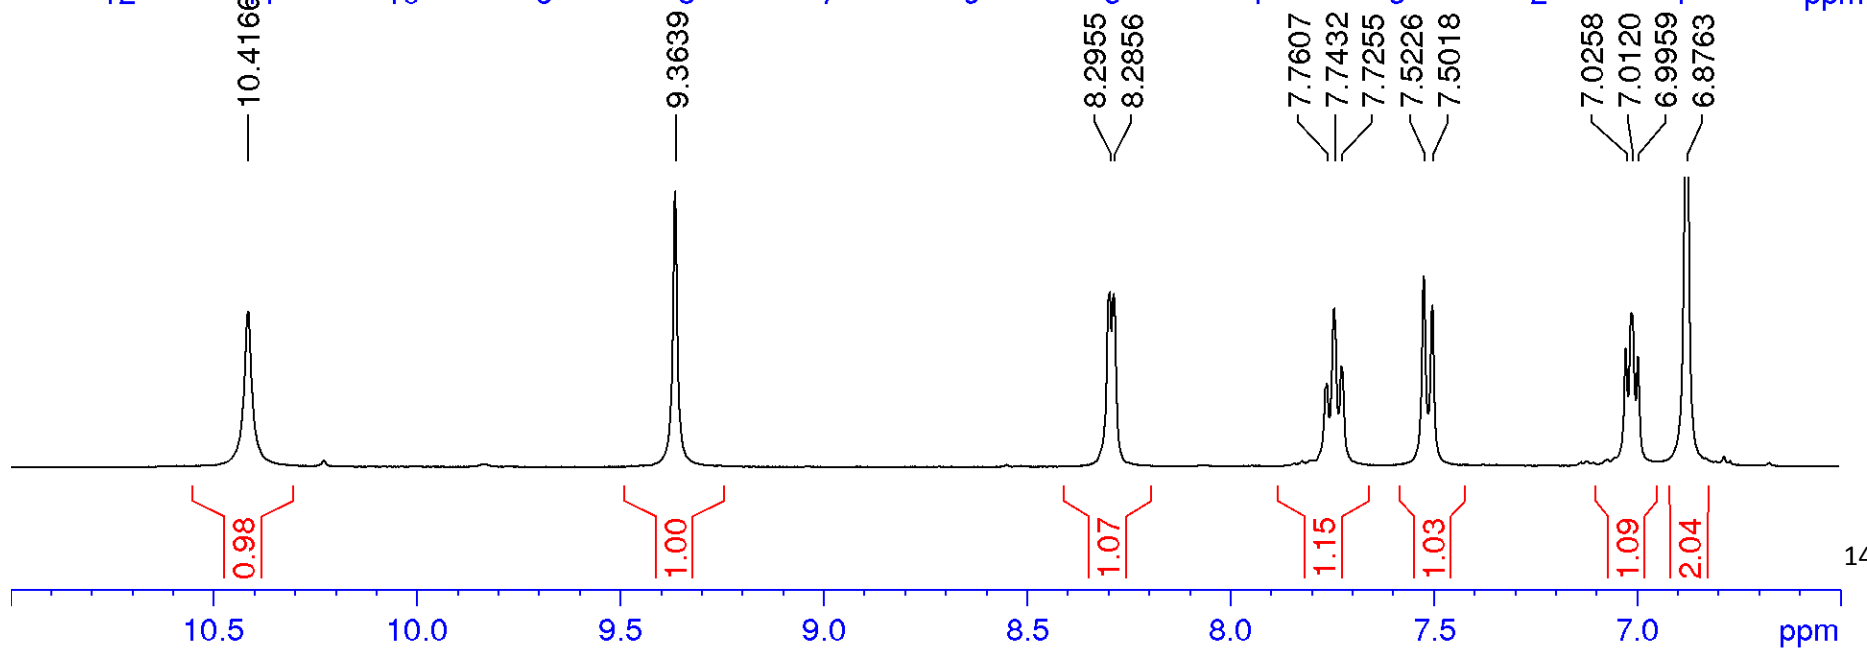

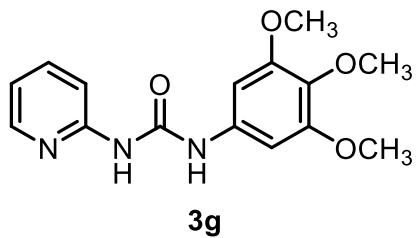

153.39  
153.33  
152.62  
147.41  
138.95  
135.60  
133.47

117.92  
112.38

97.20

60.58  
56.25  
40.61  
40.40  
40.19  
39.98  
39.77  
39.56  
39.36

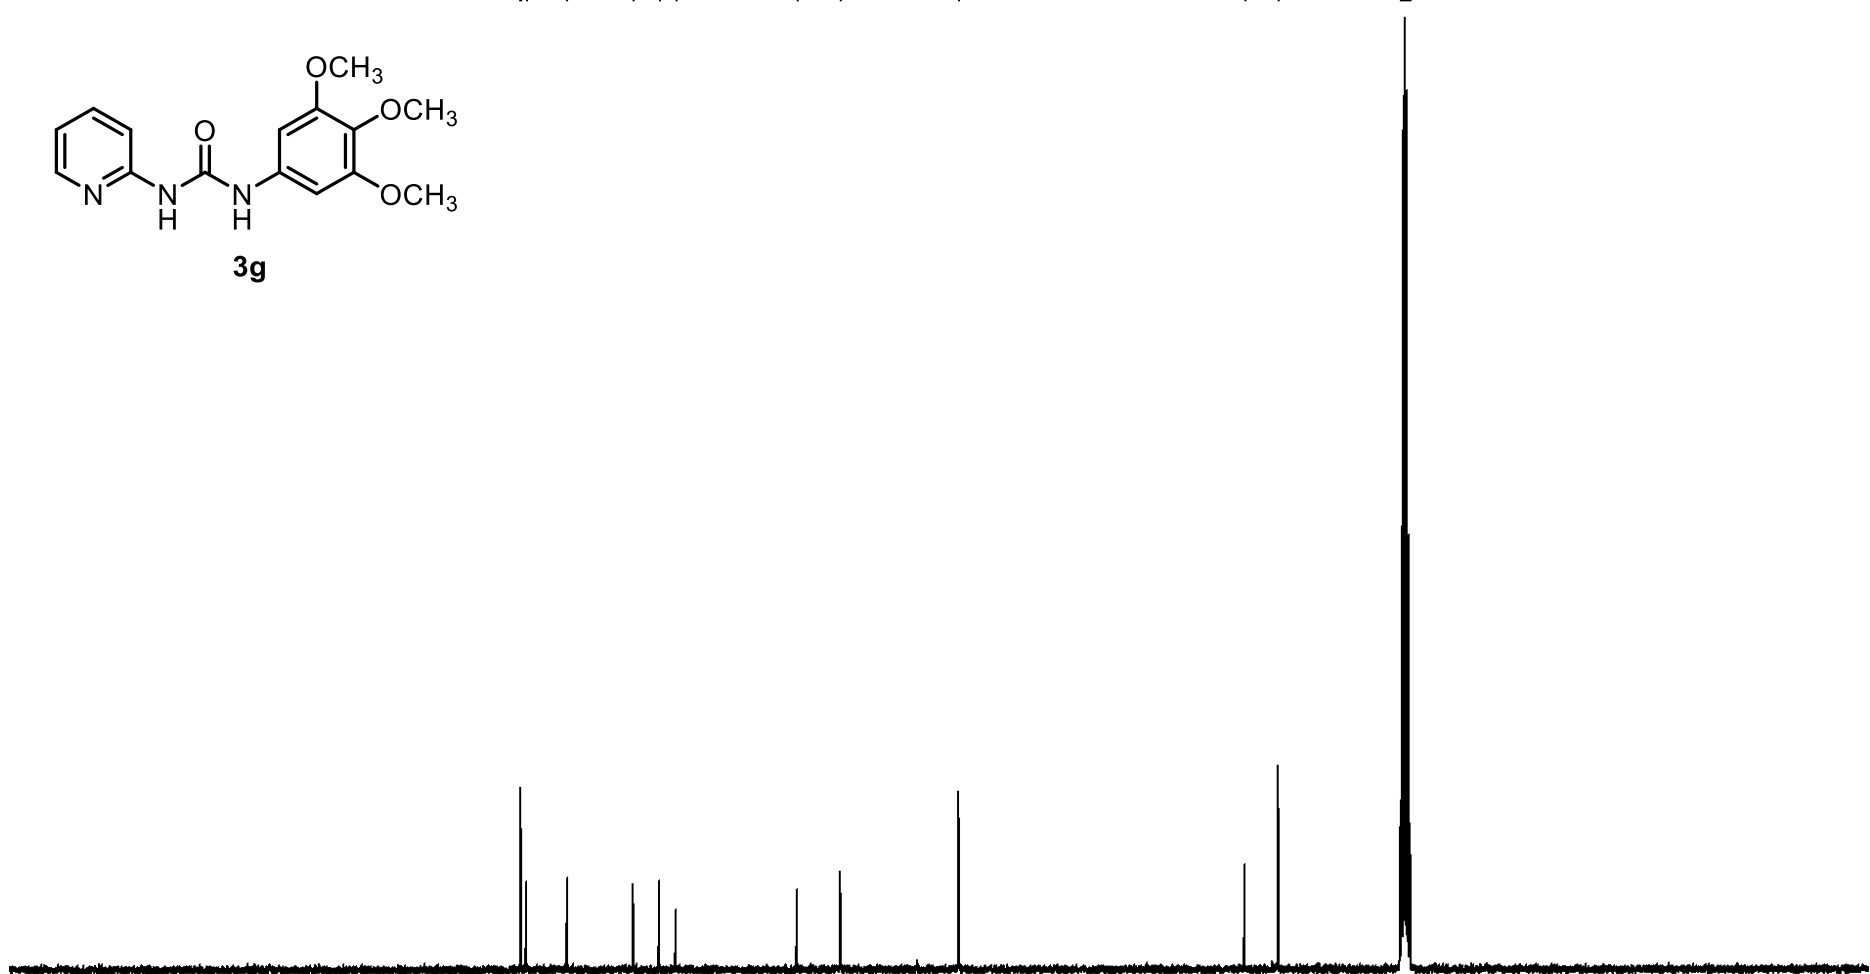

200

180

160

140

120

100

80

60

40

20

0

ppm

15

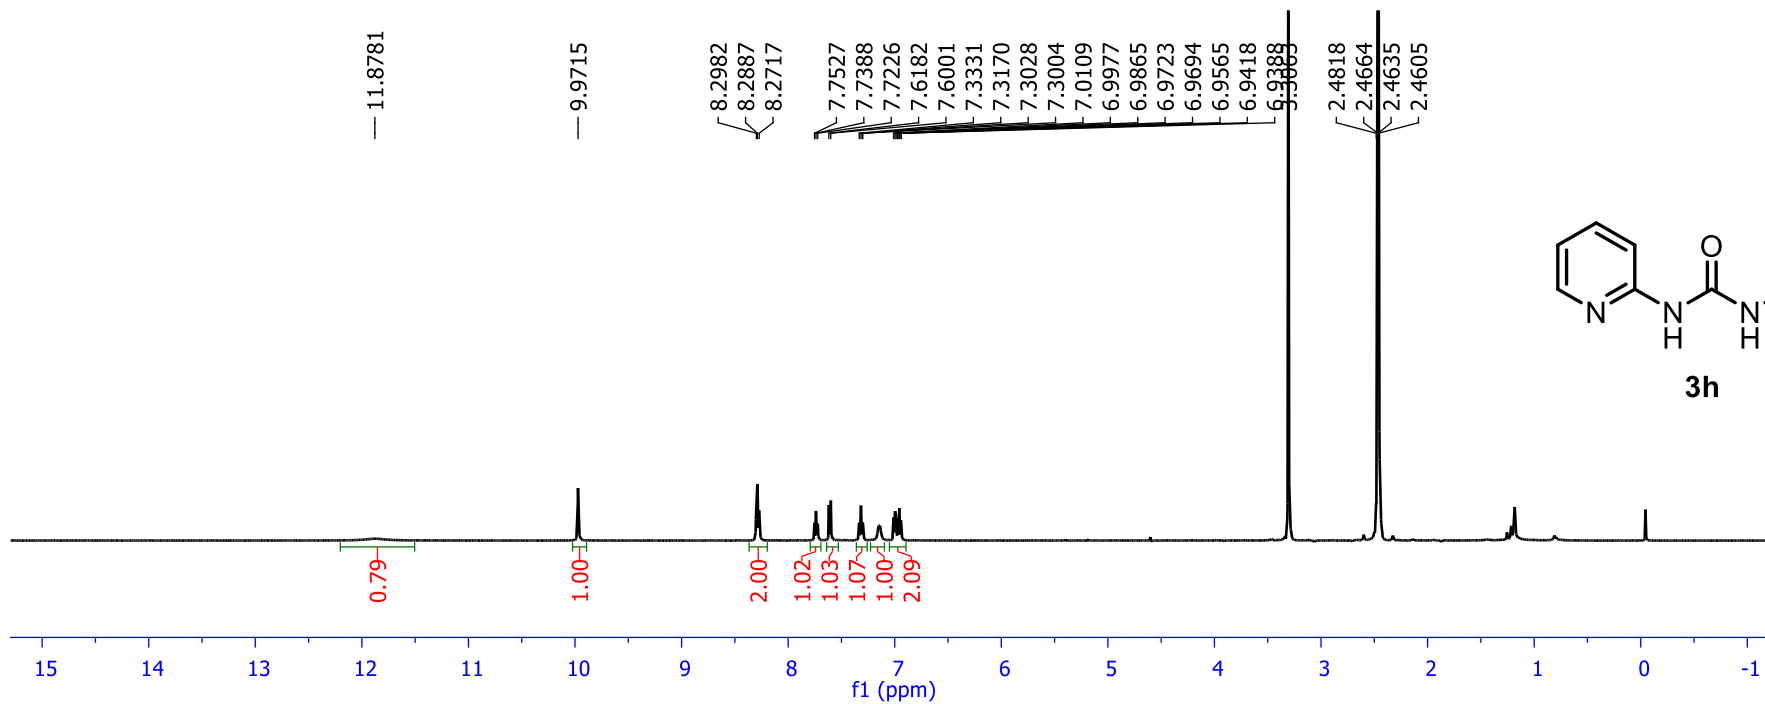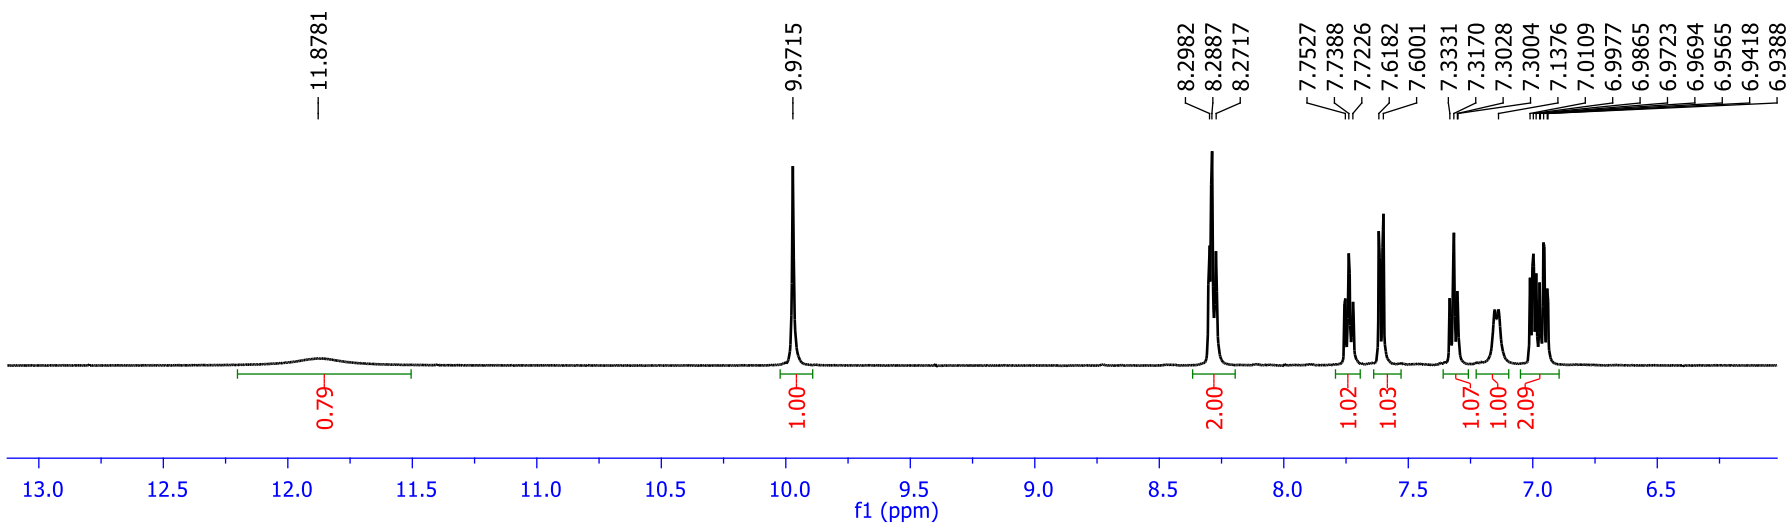



153.14  
152.73  
146.67  
139.39  
137.96  
132.98  
128.55  
124.60  
122.14  
117.89  
113.13  
112.39

40.60  
40.39  
40.19  
39.98  
39.77  
39.56  
39.35  
29.43

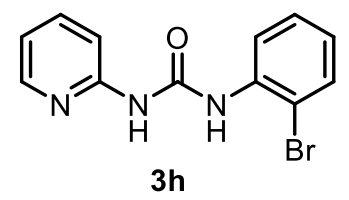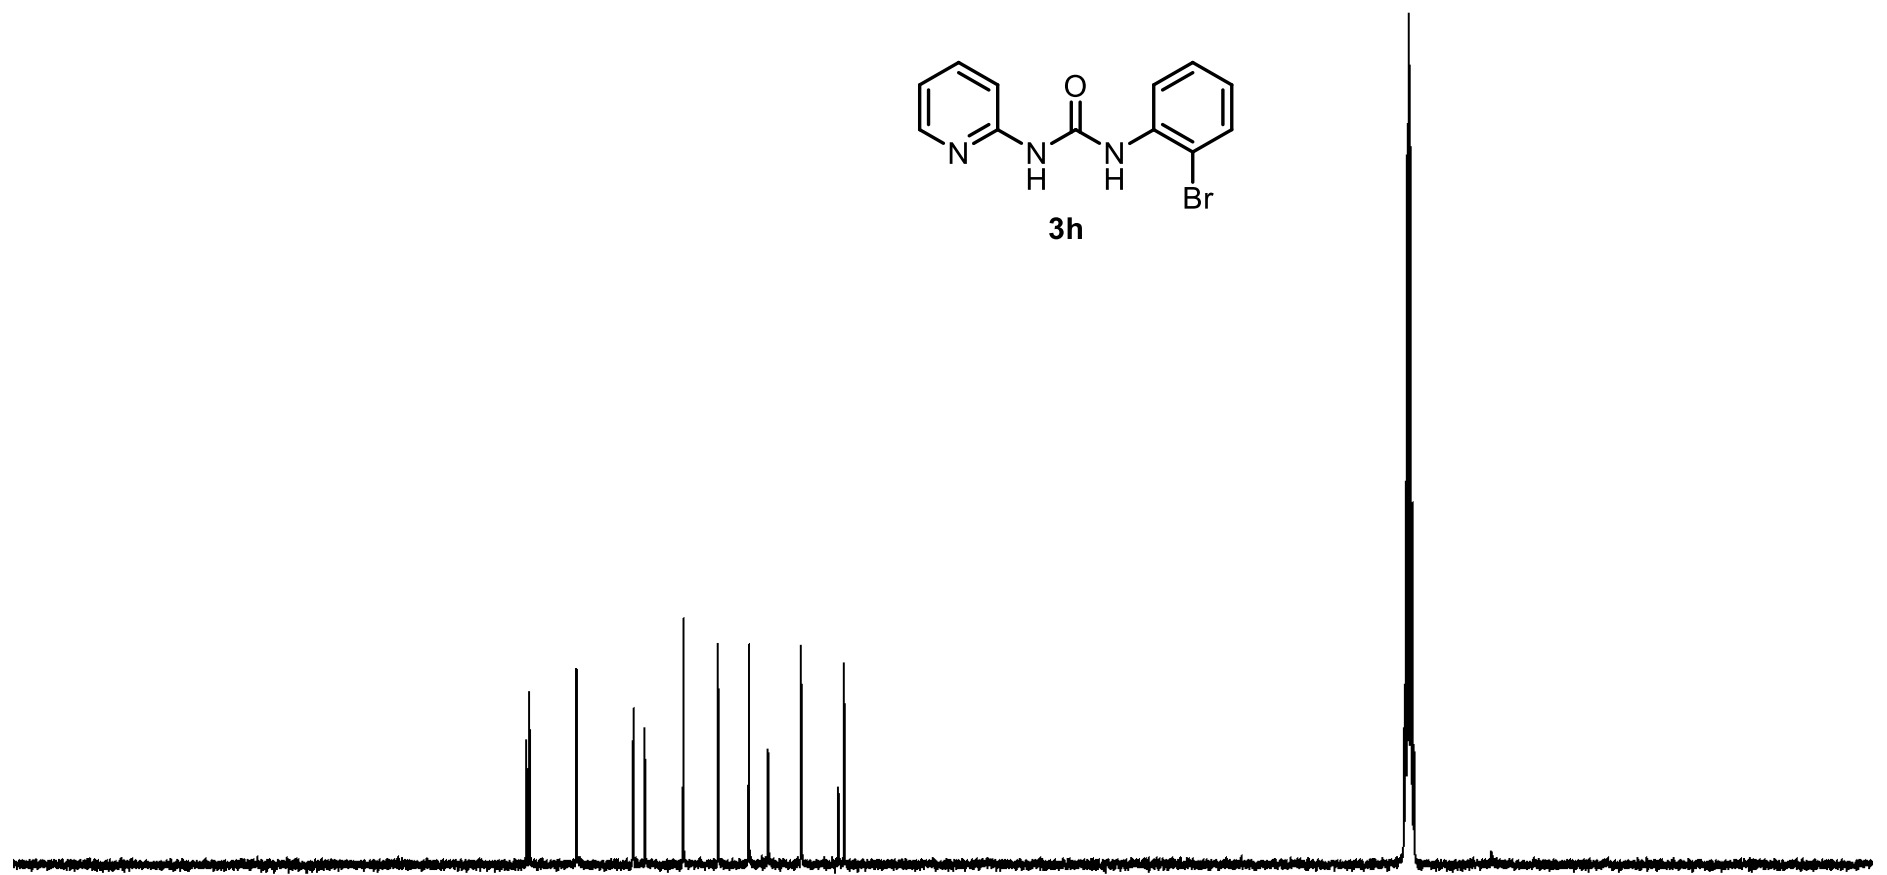

200 180 160 140 120 100 80 60 40 20 0 ppm

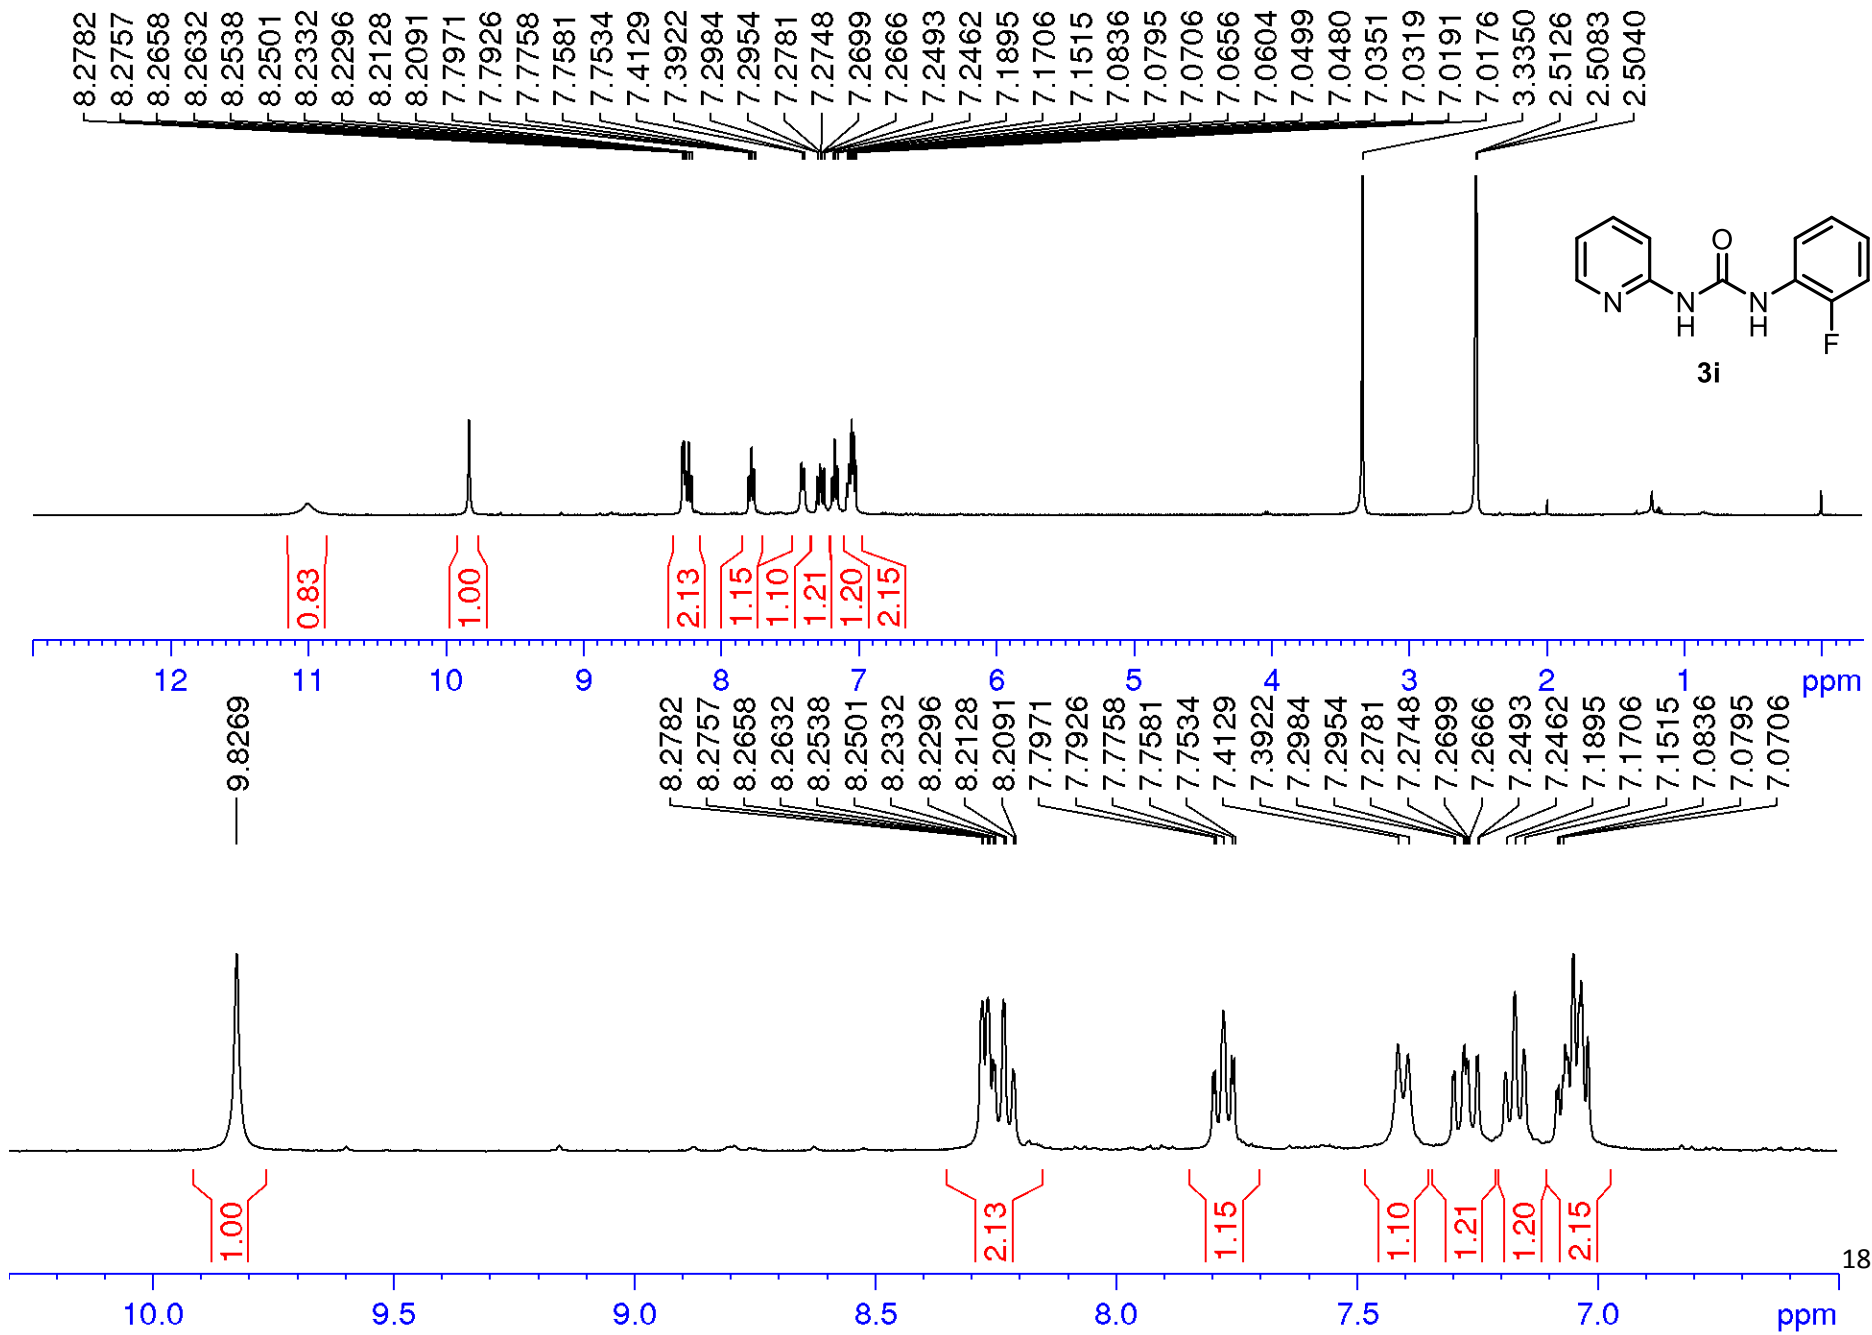

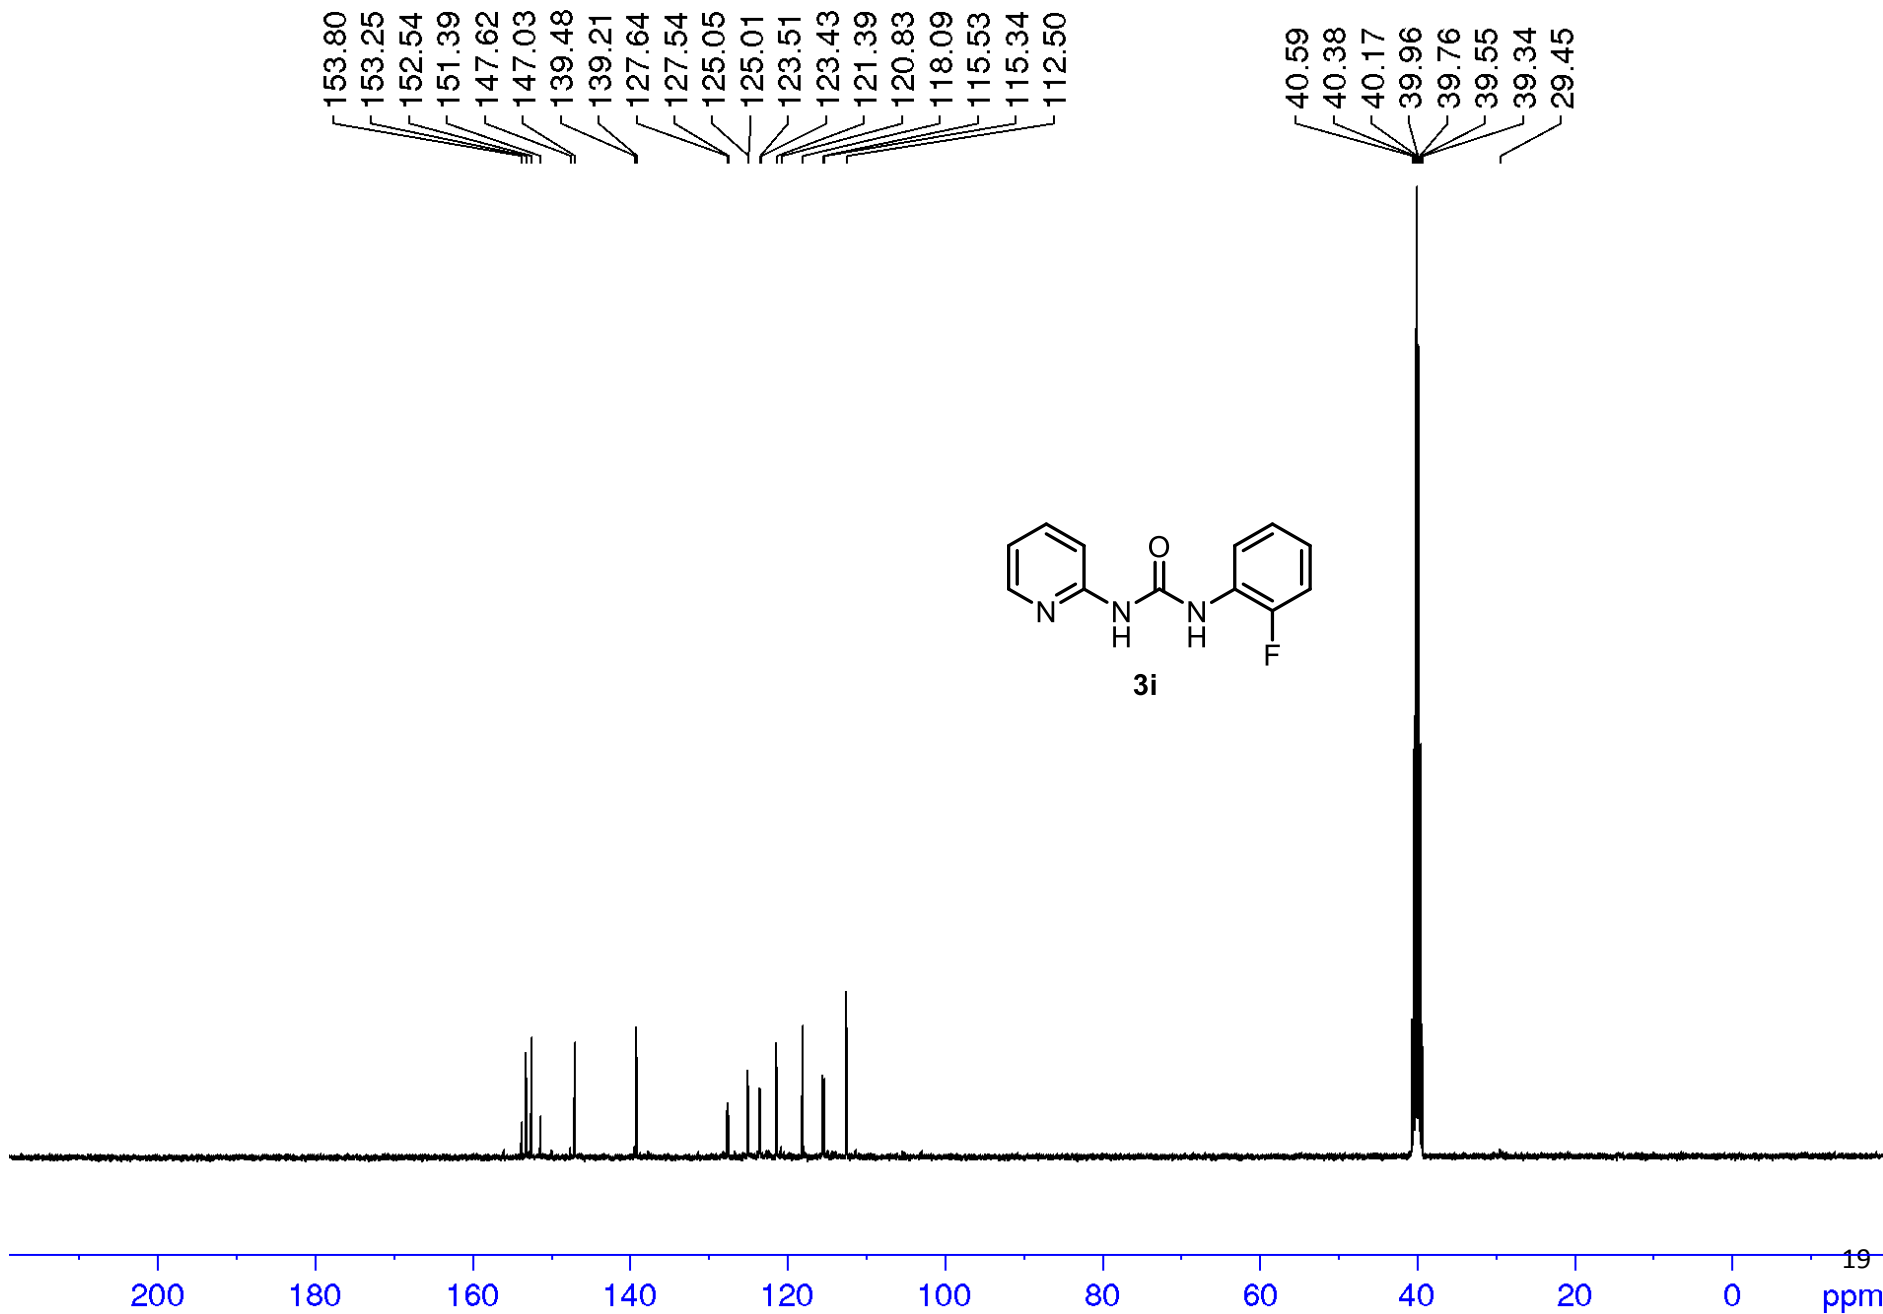

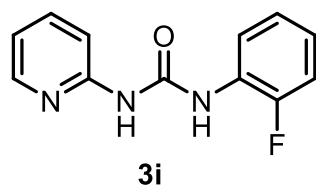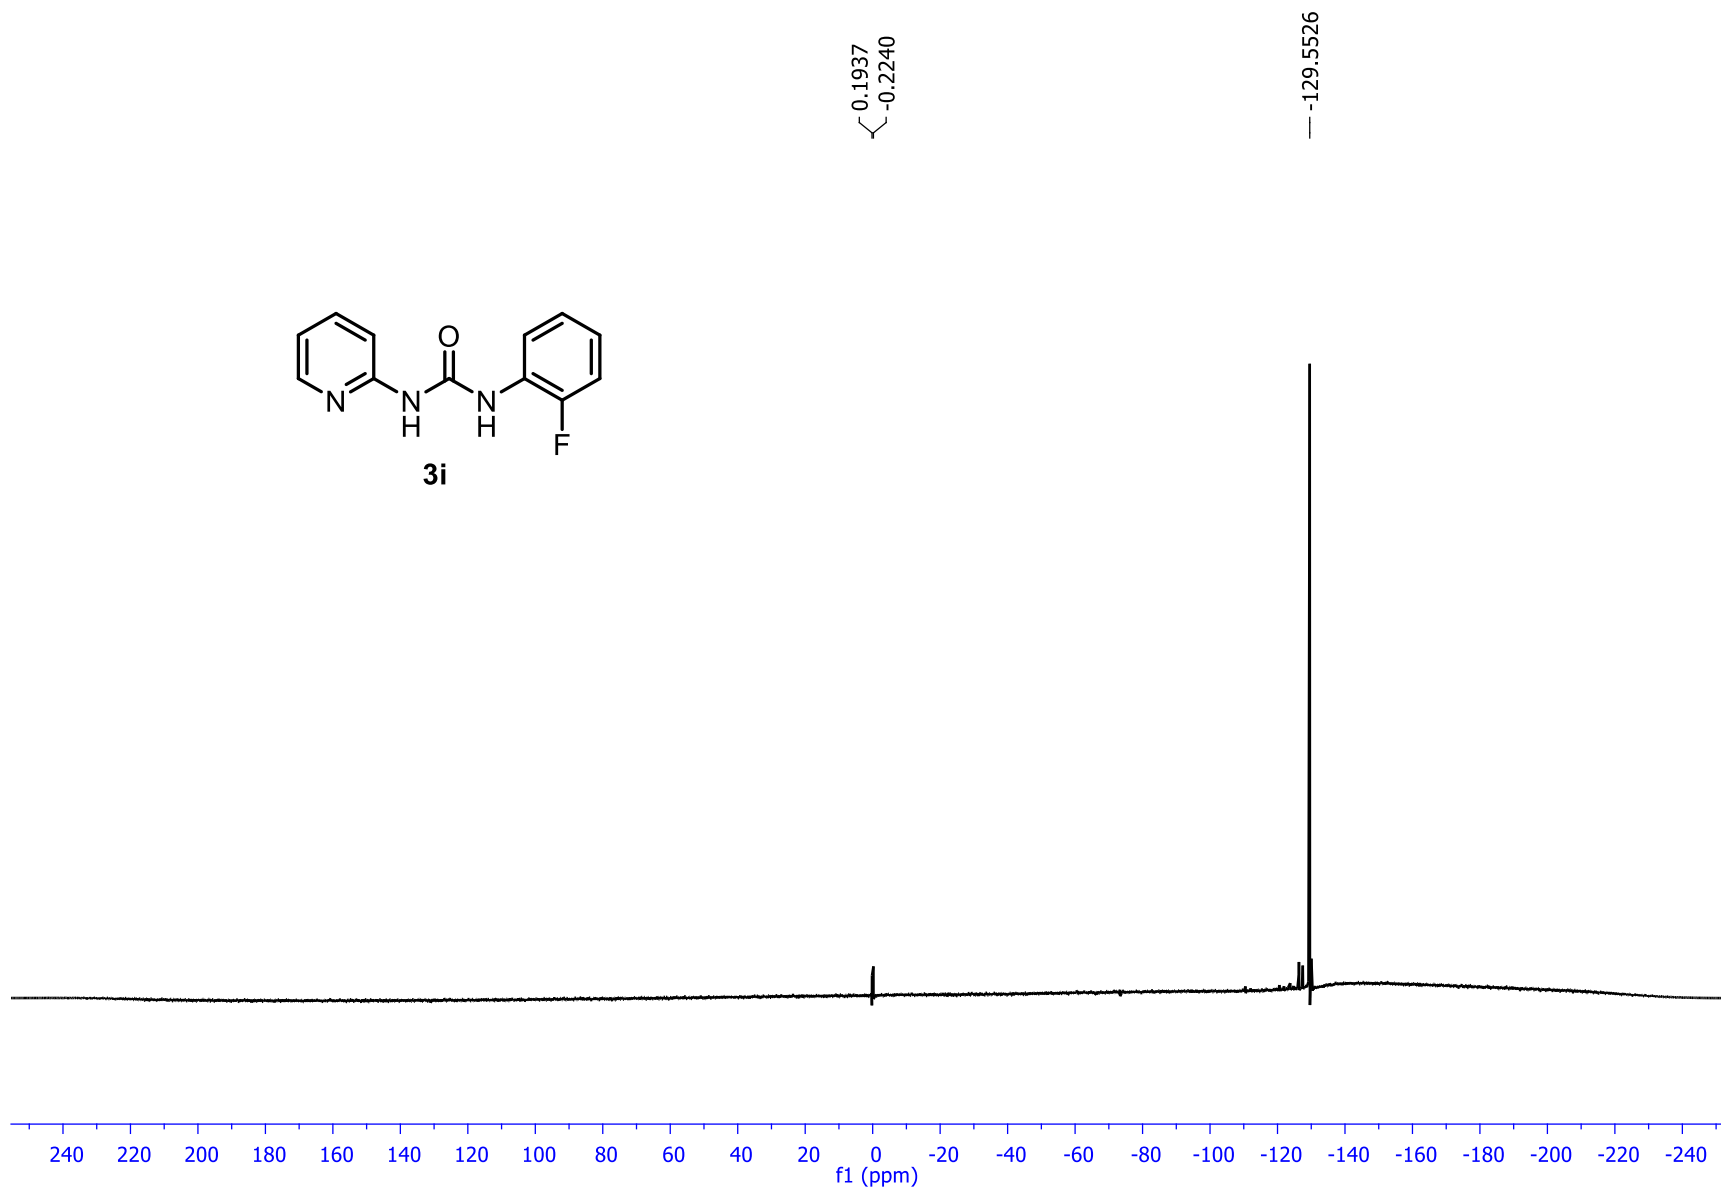

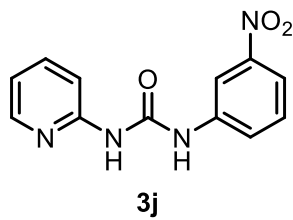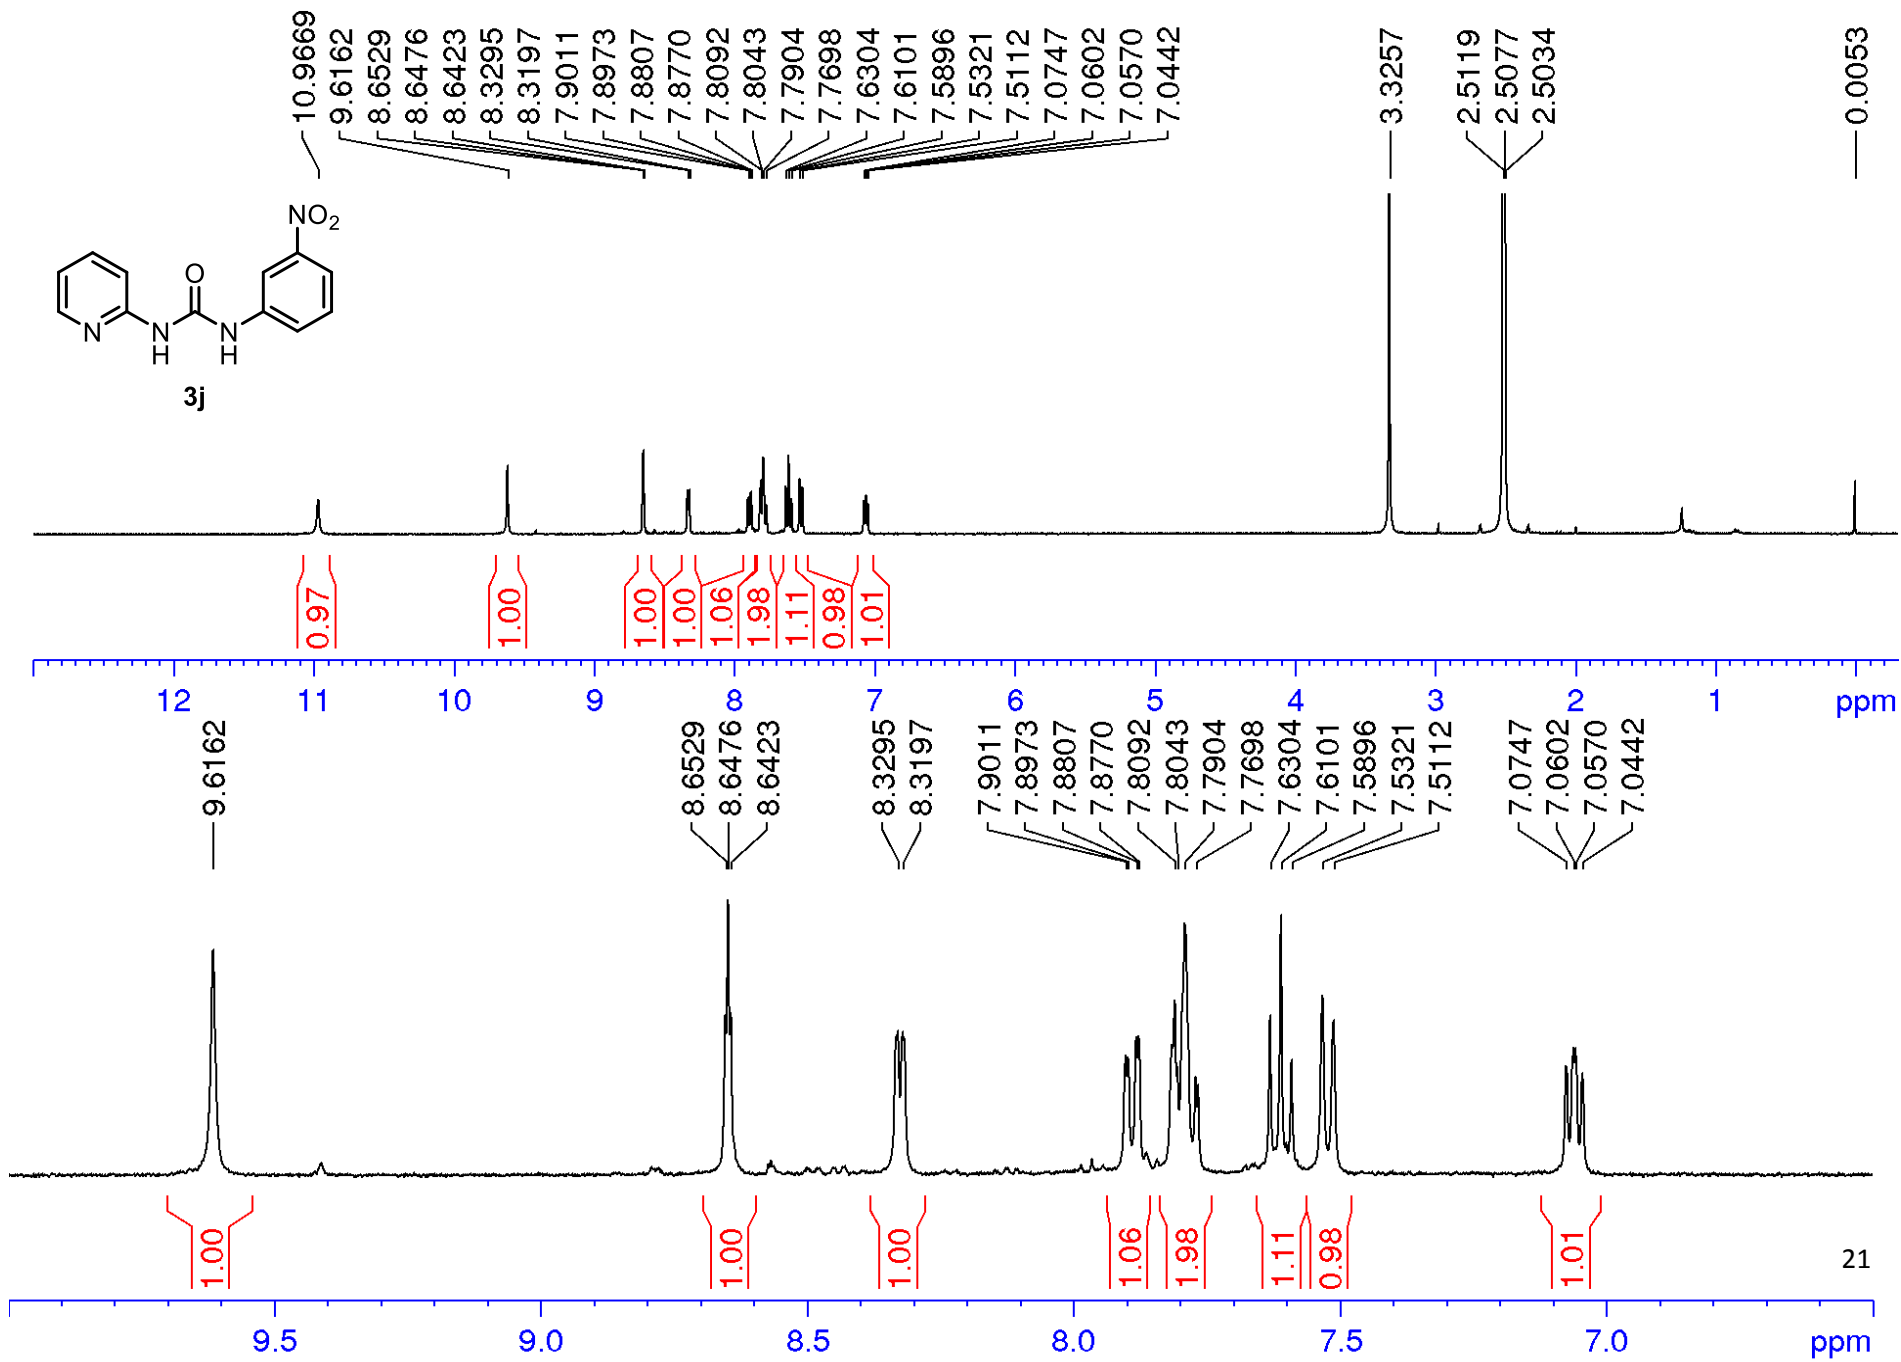

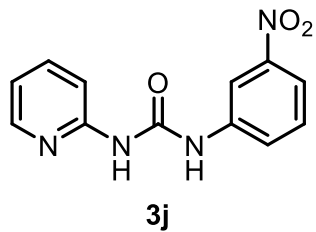

- 152.4652
- 152.1772
- 148.1459
- 146.9640
- 140.2850
- 138.6825
- 130.1379
- 124.9415
- 117.8667
- 116.9763
- 112.6650
- 112.0408

- 40.0999
- 39.8906
- 39.6818
- 39.1791
- 39.2644
- 39.0557
- 38.8469

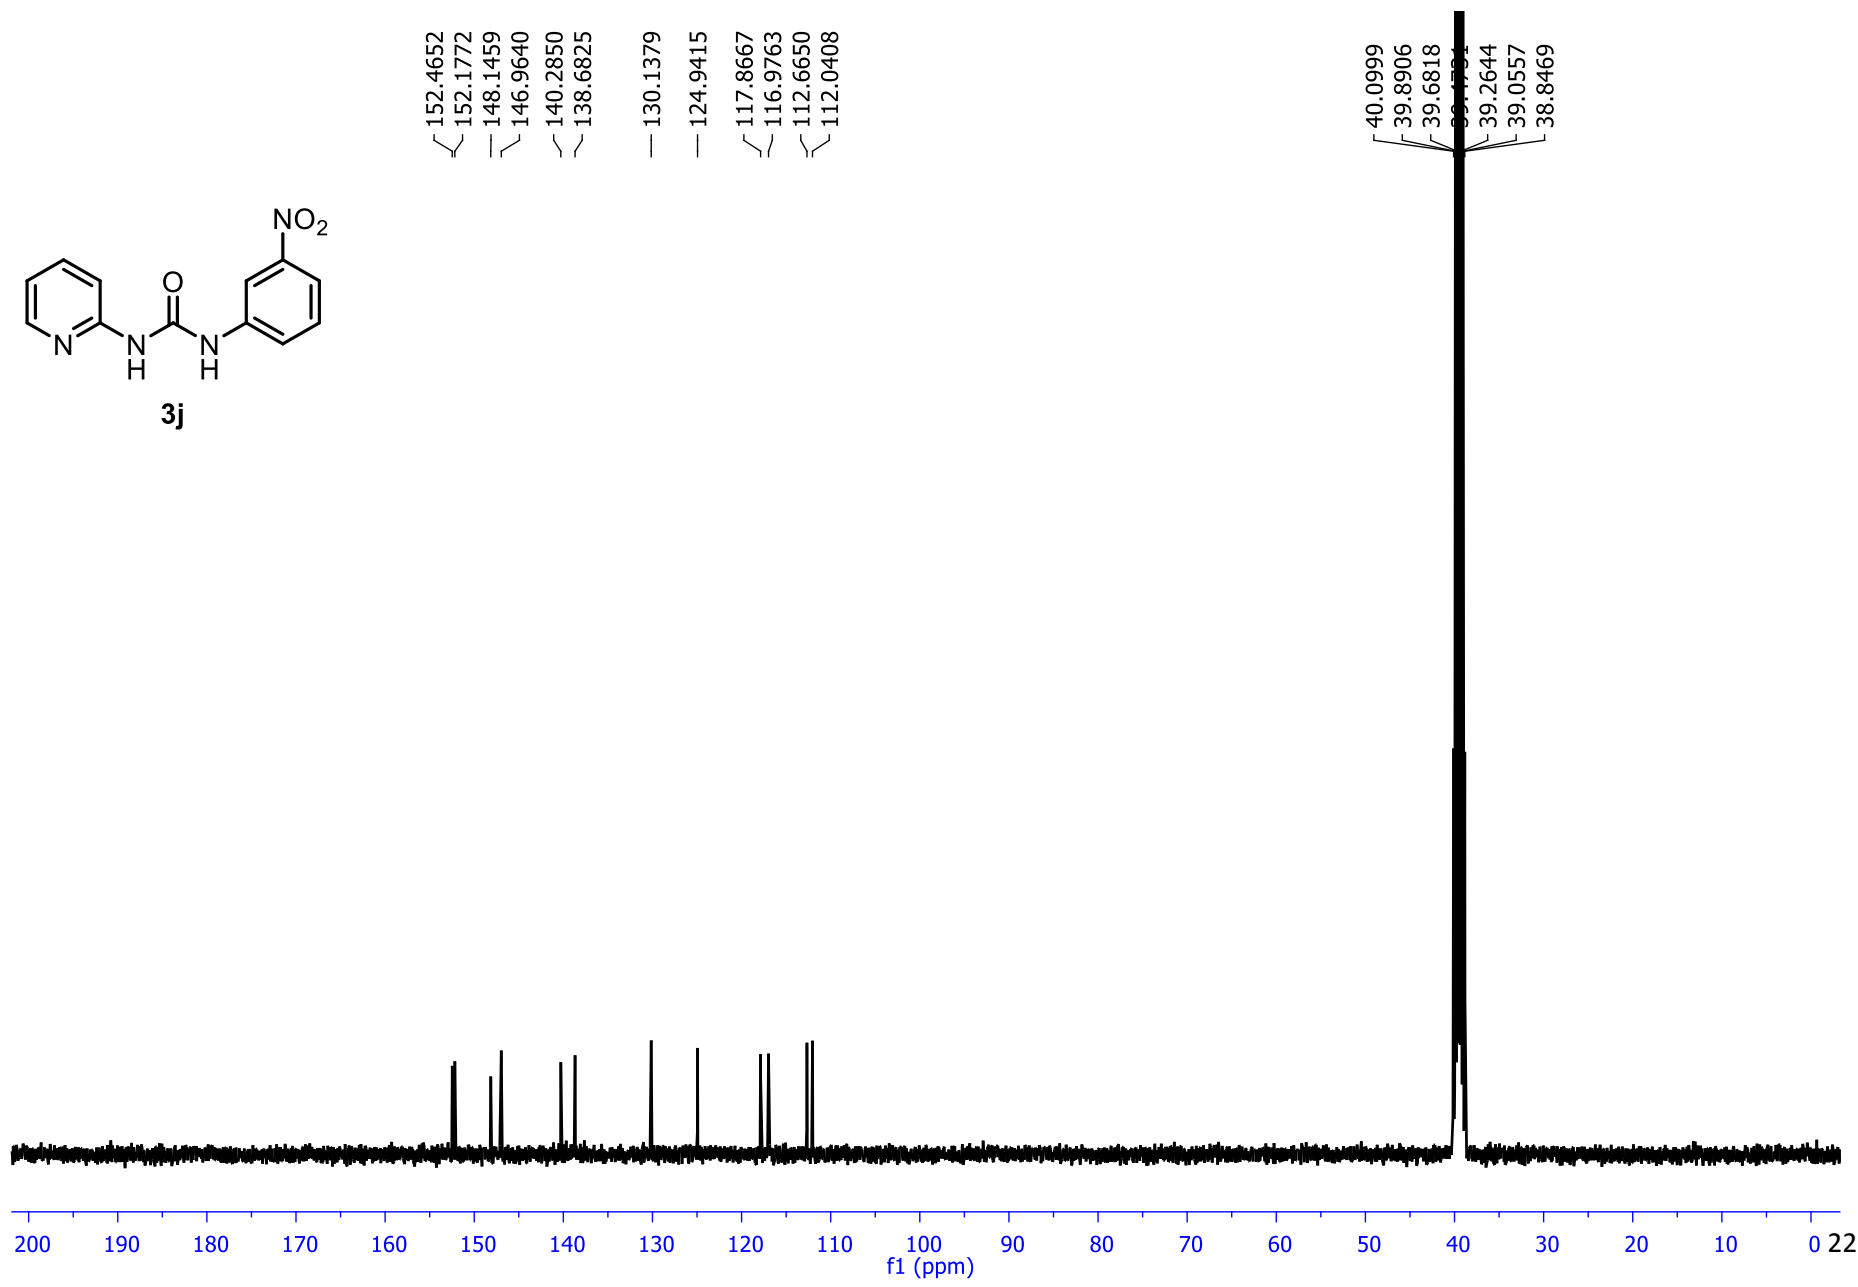

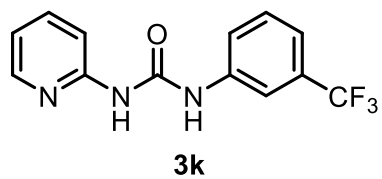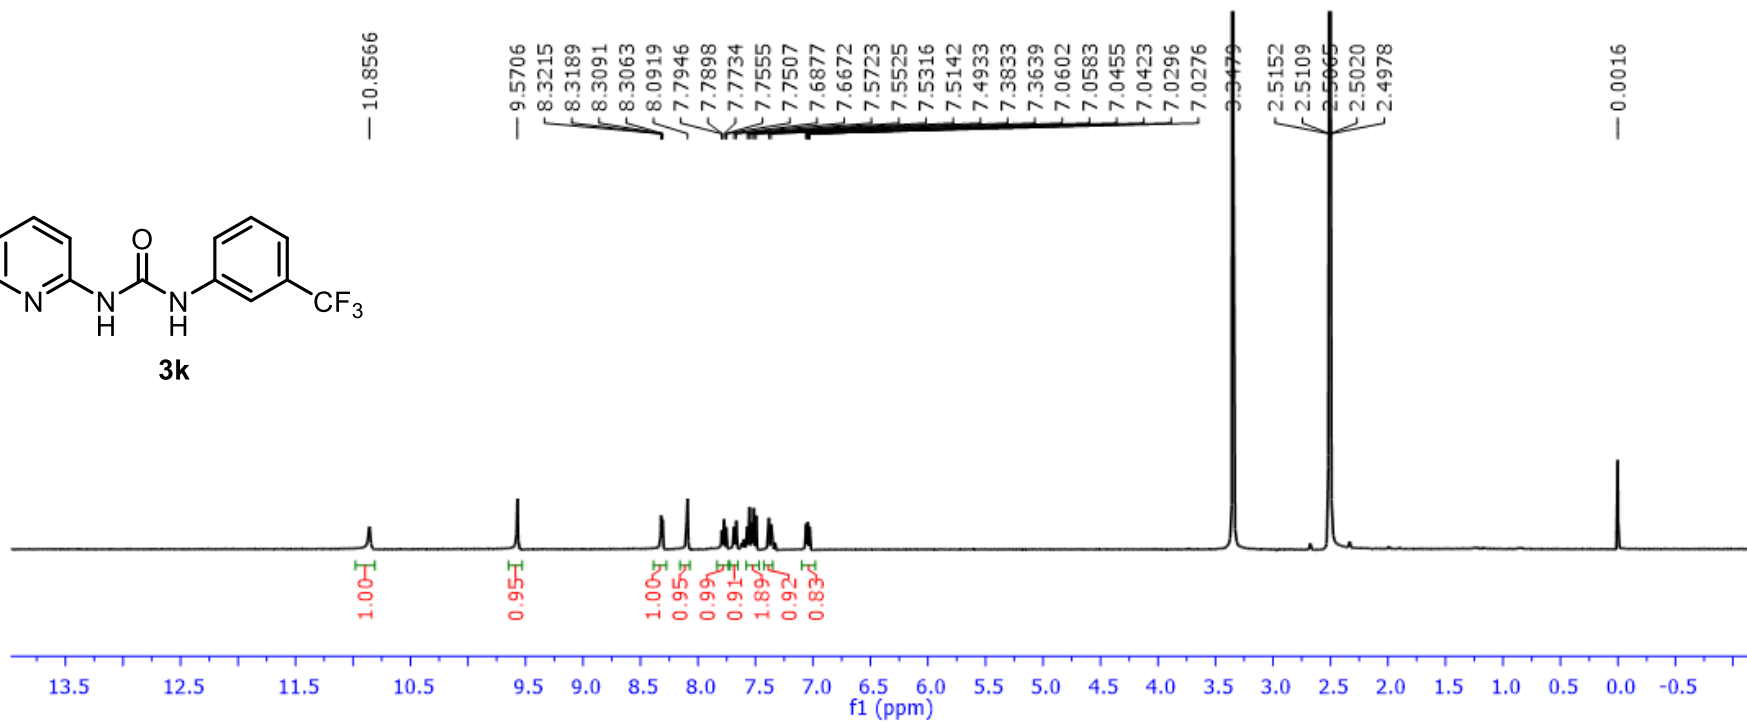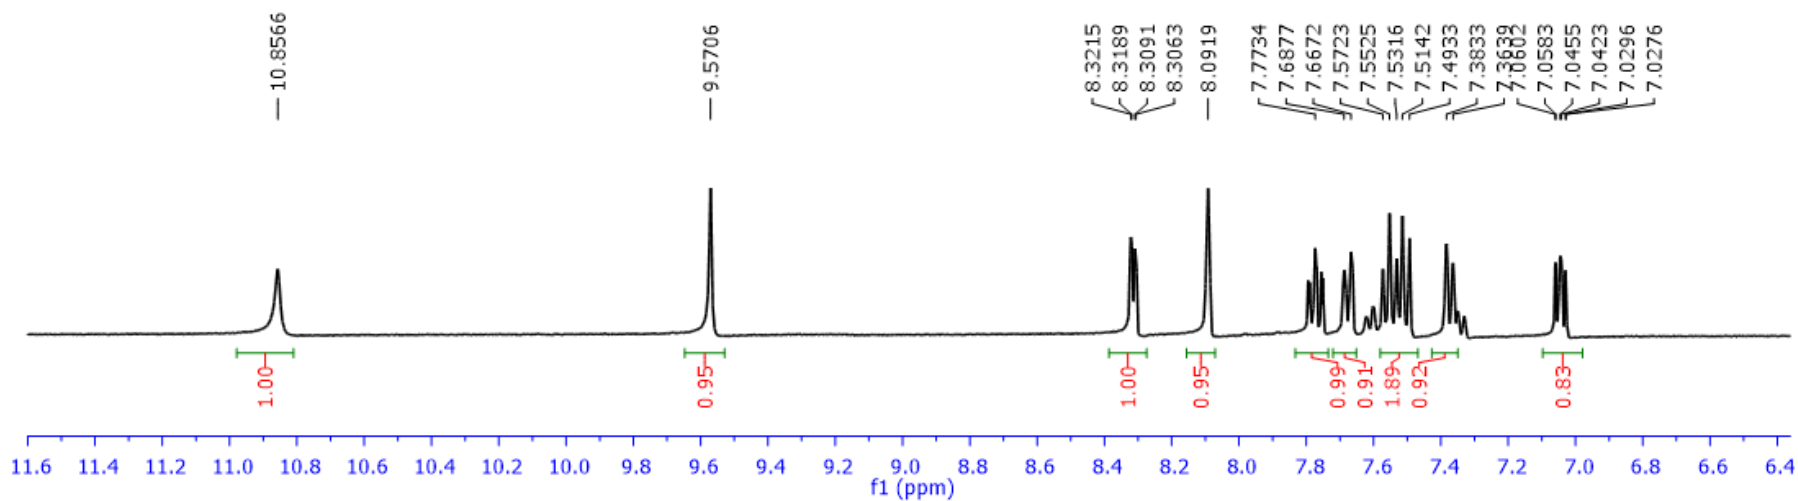

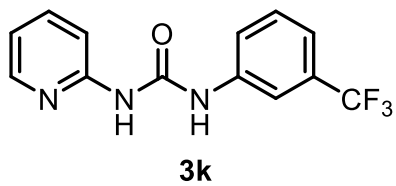

— 152.9508  
— 147.5138  
— 139.2160  
} 130.5687  
} 123.0273  
} 118.3157  
} 112.5411

40.5996  
40.5097  
40.4324  
40.3426  
40.2655  
40.1760  
40.0986  
40.0091  
39.8423  
39.6754  
39.5089

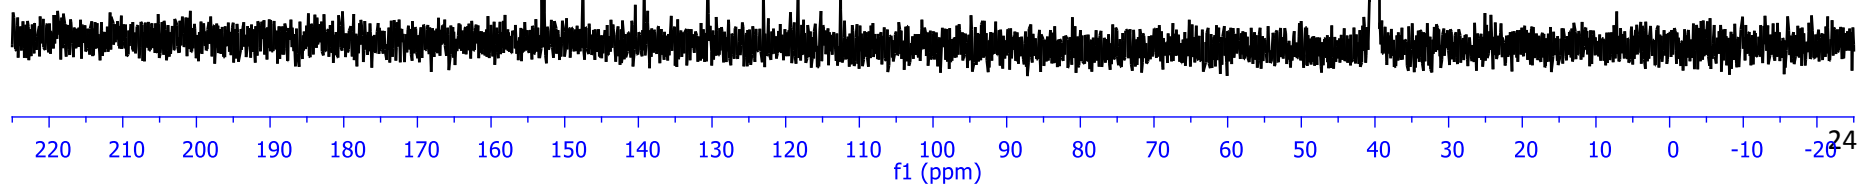



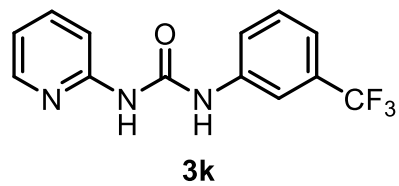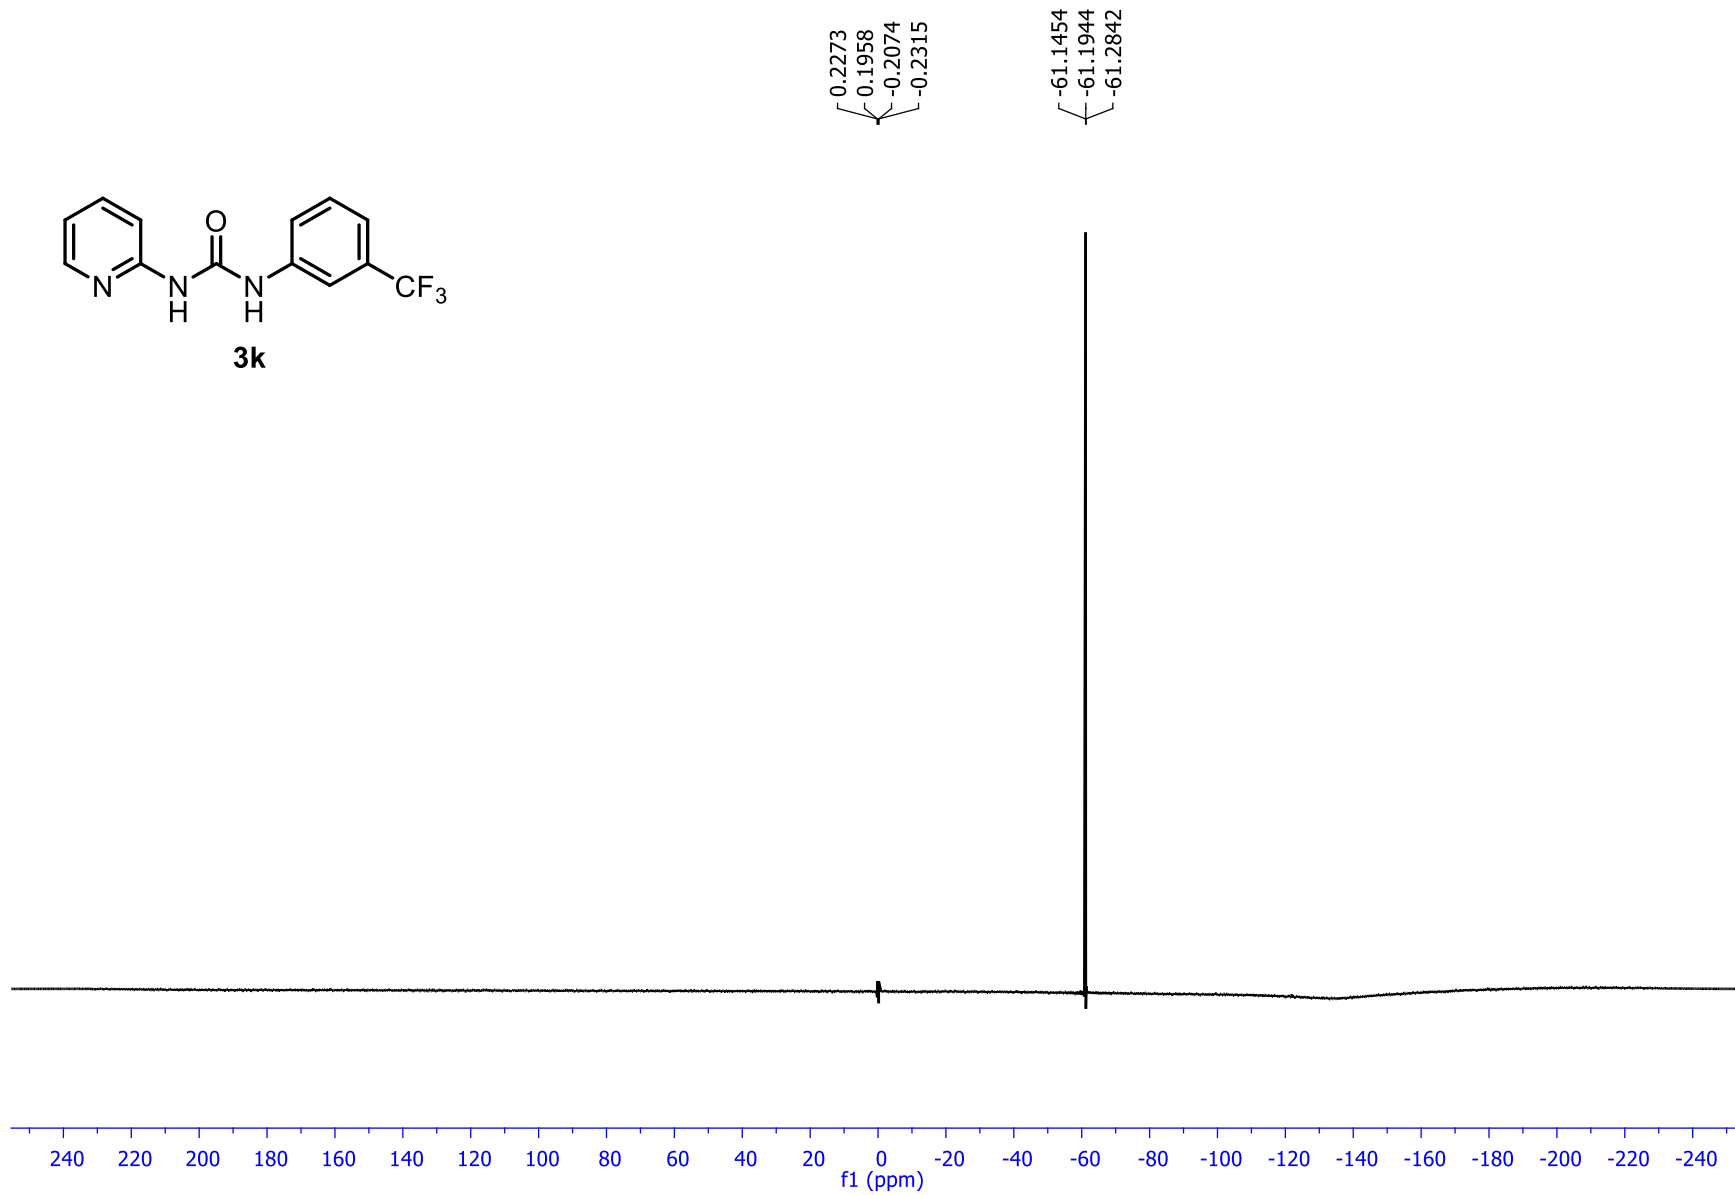

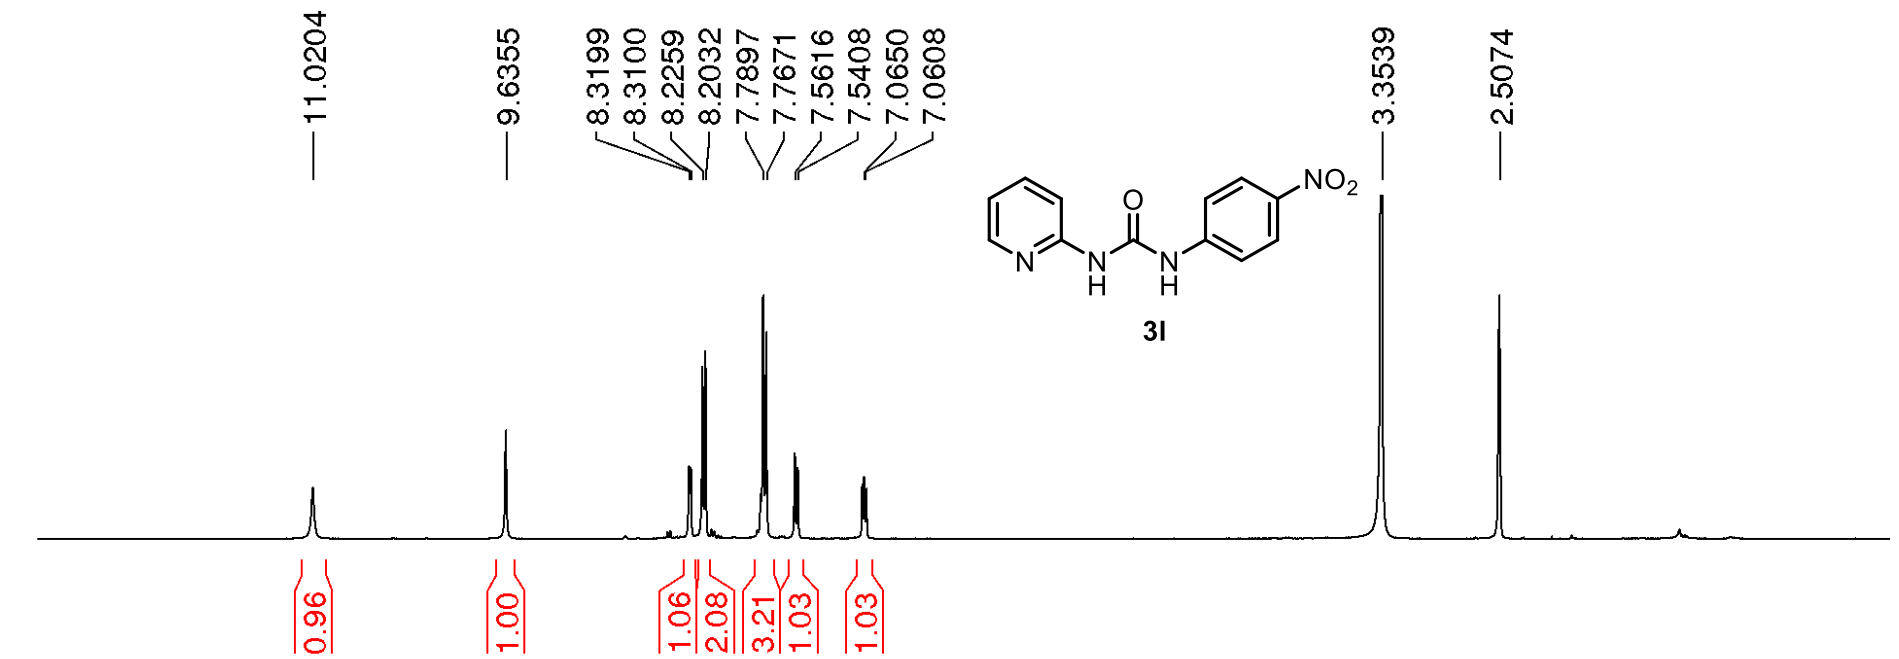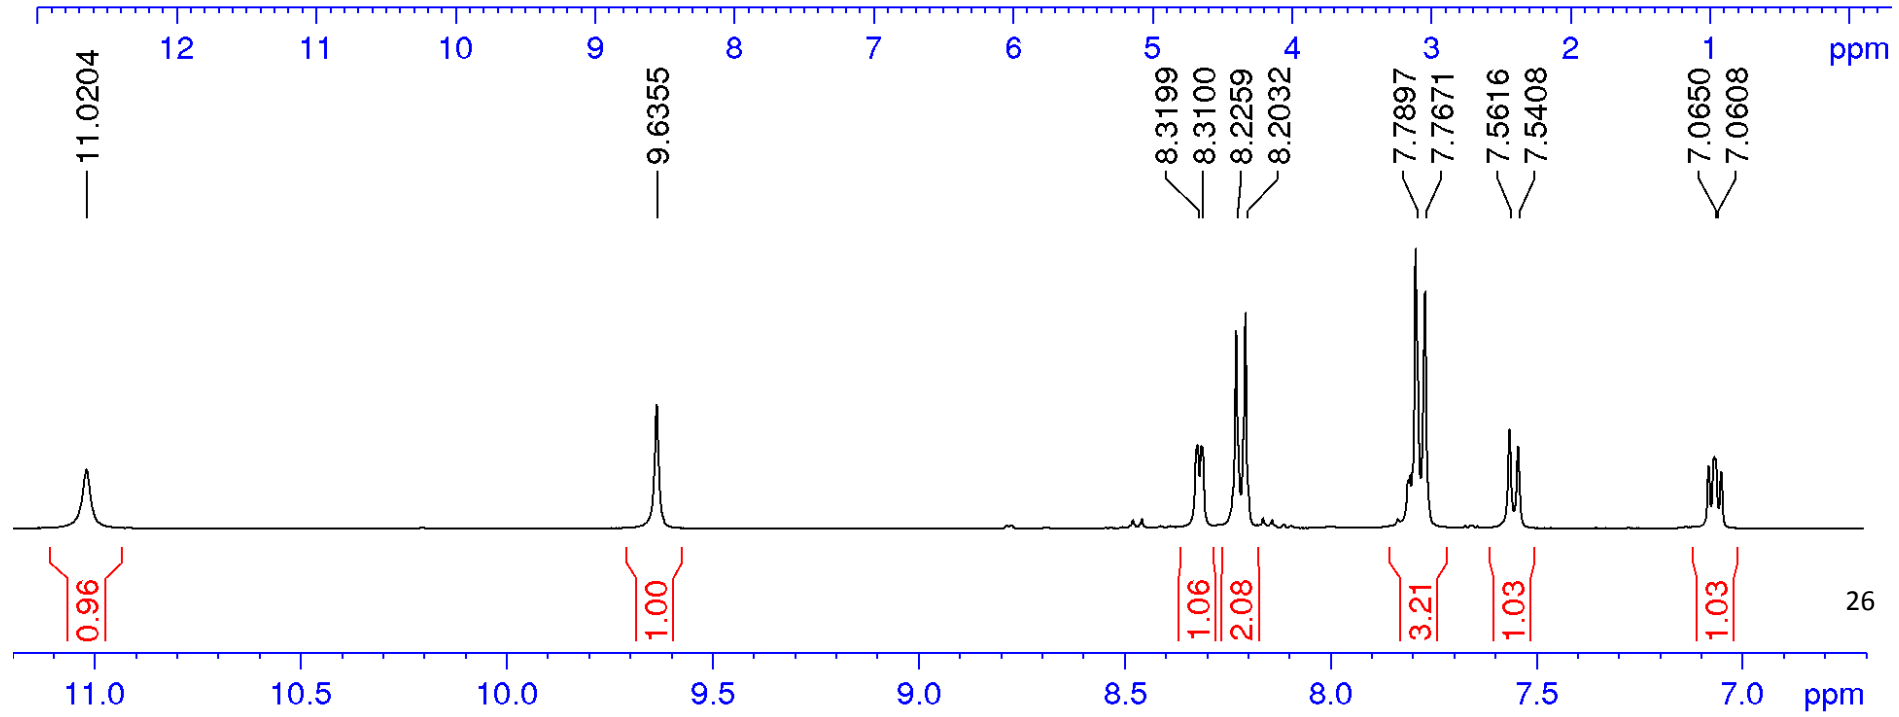

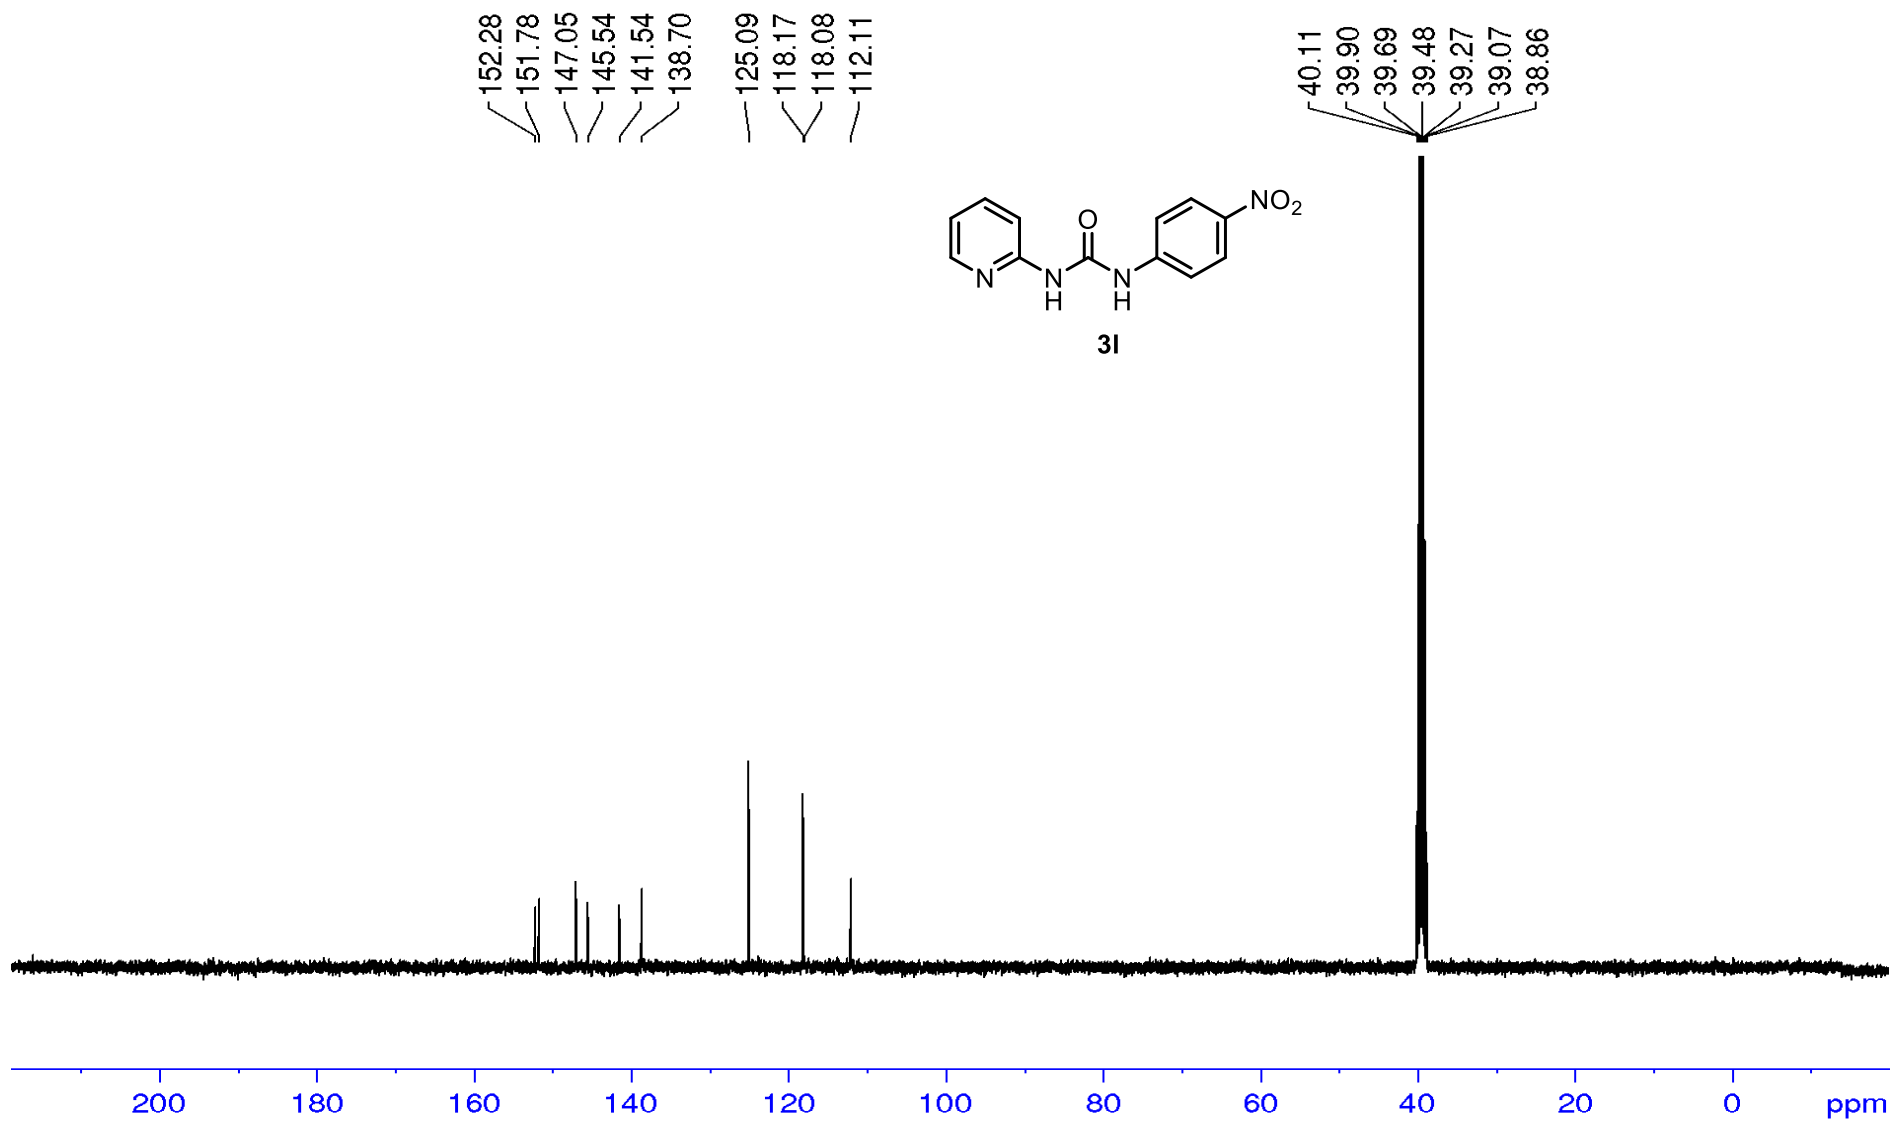

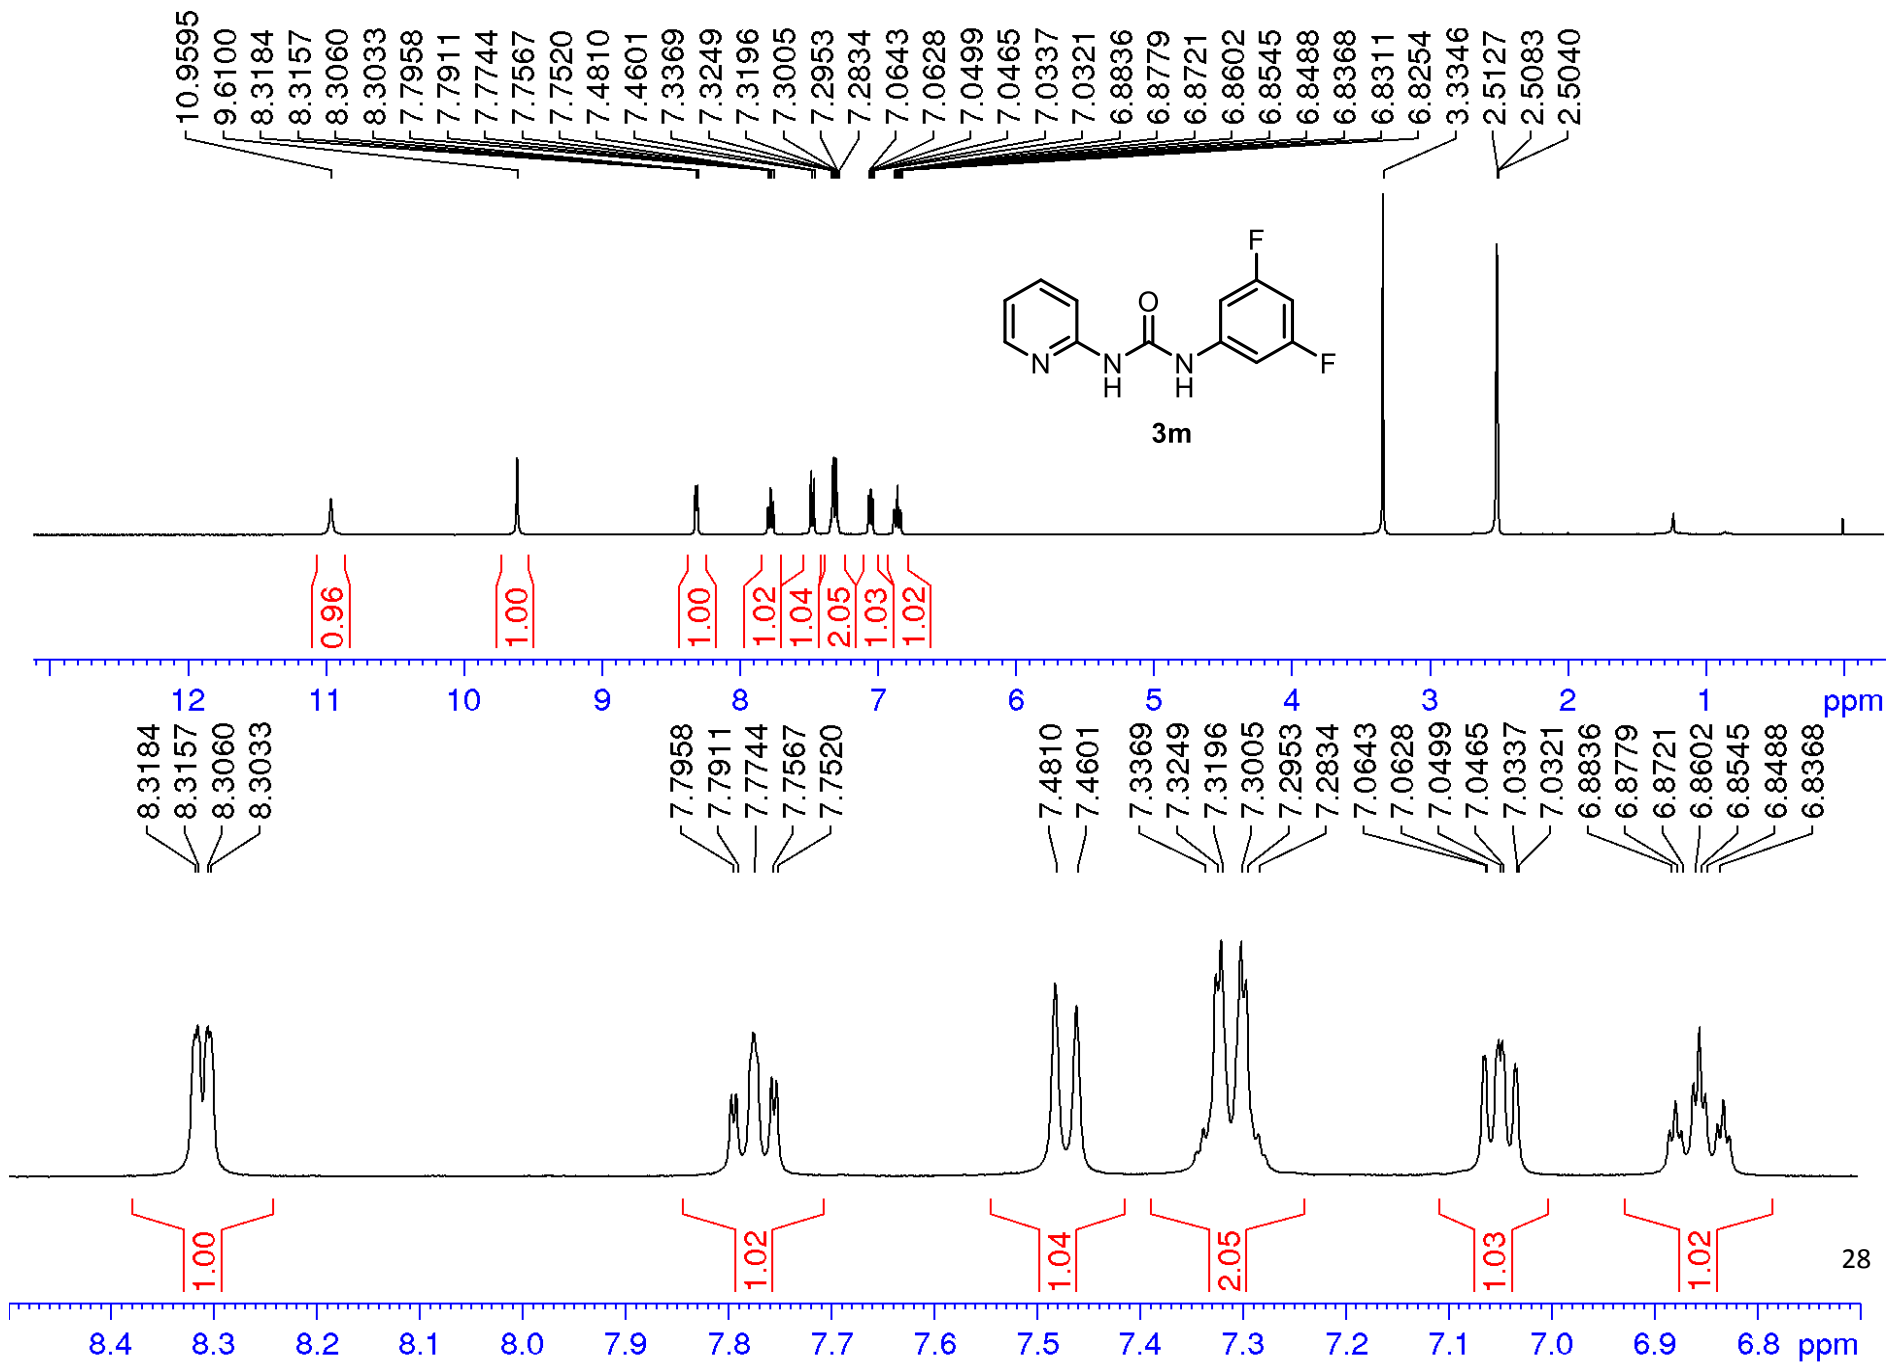

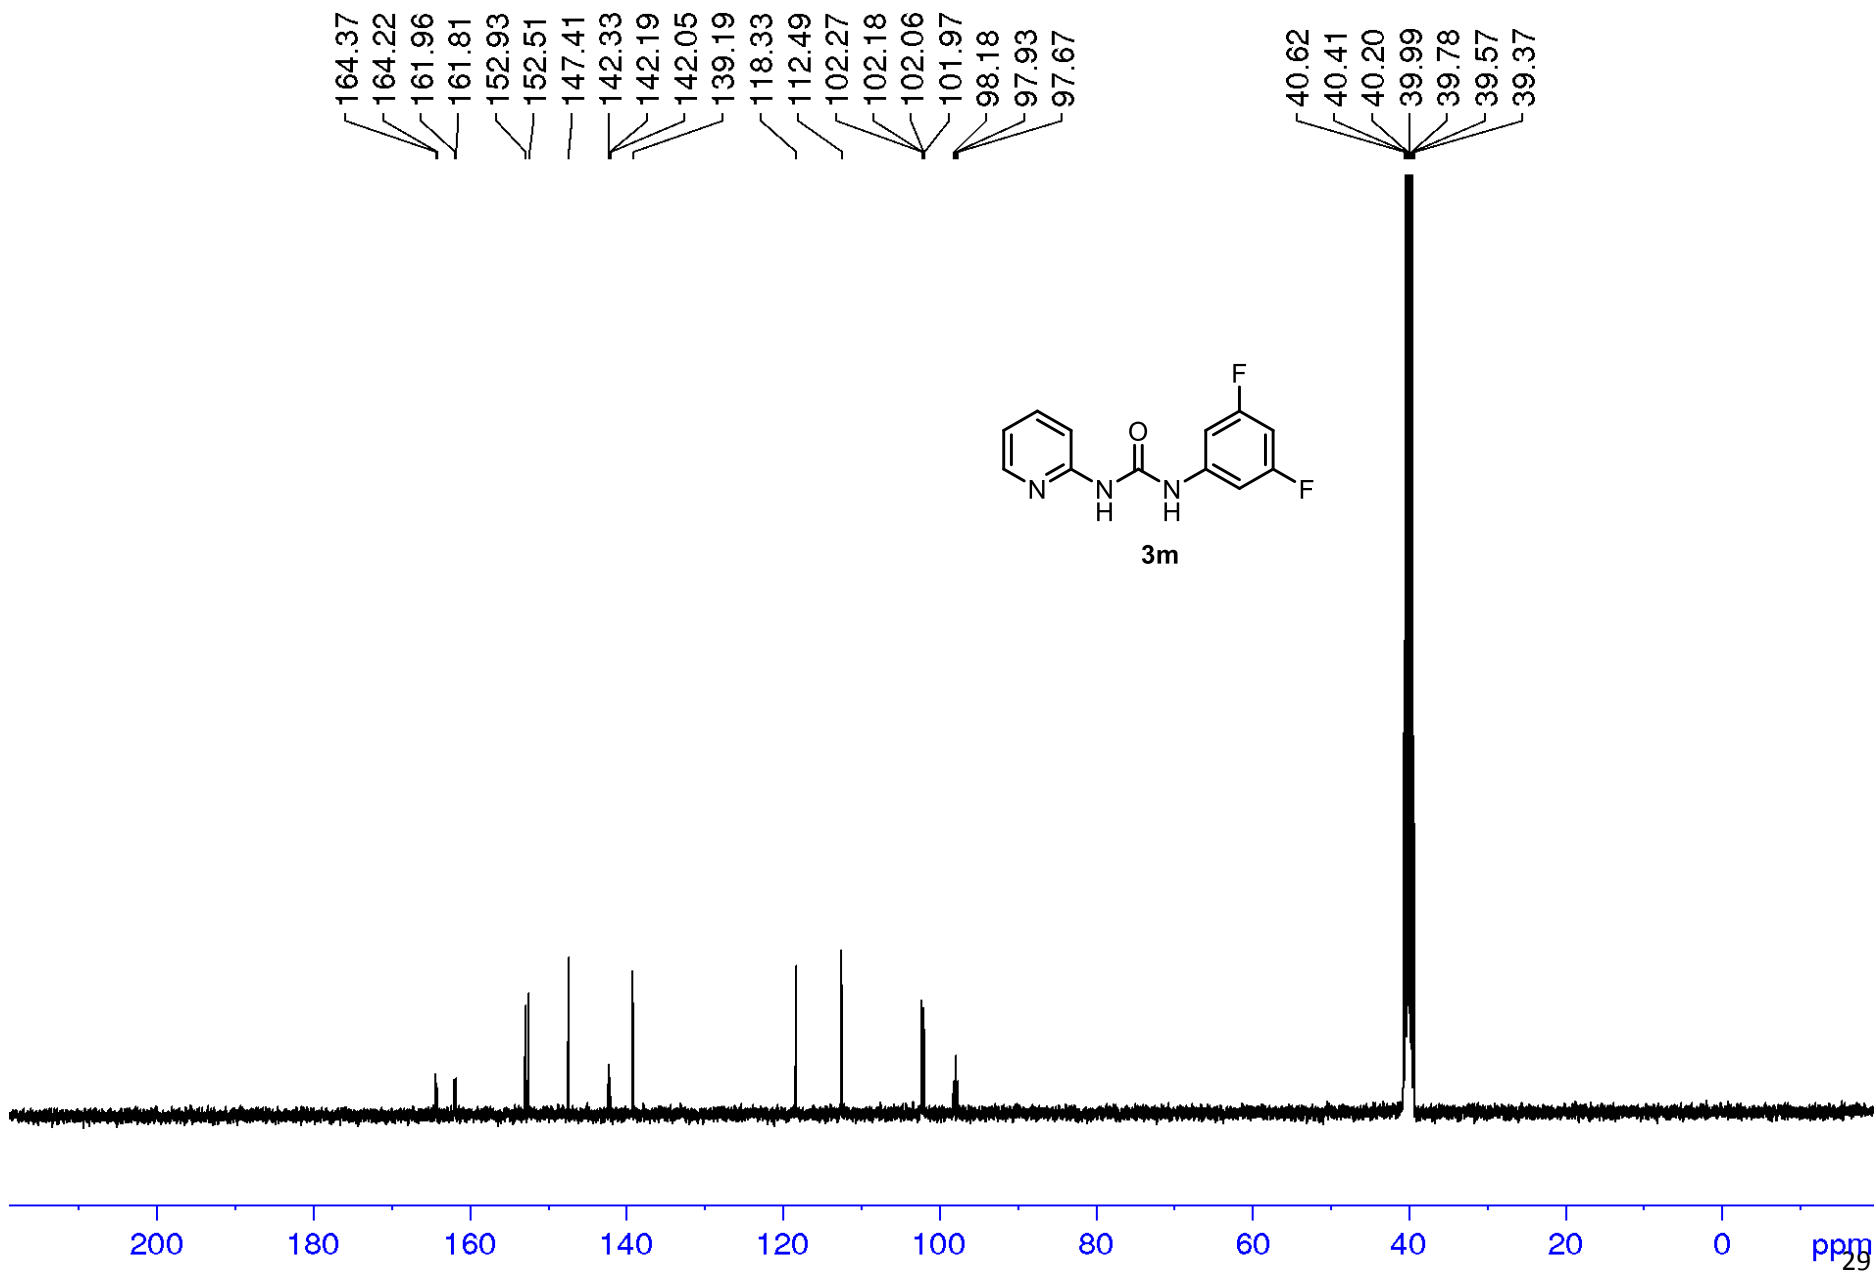

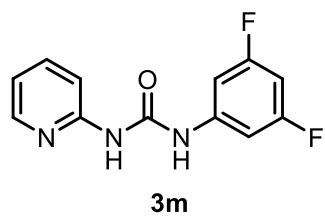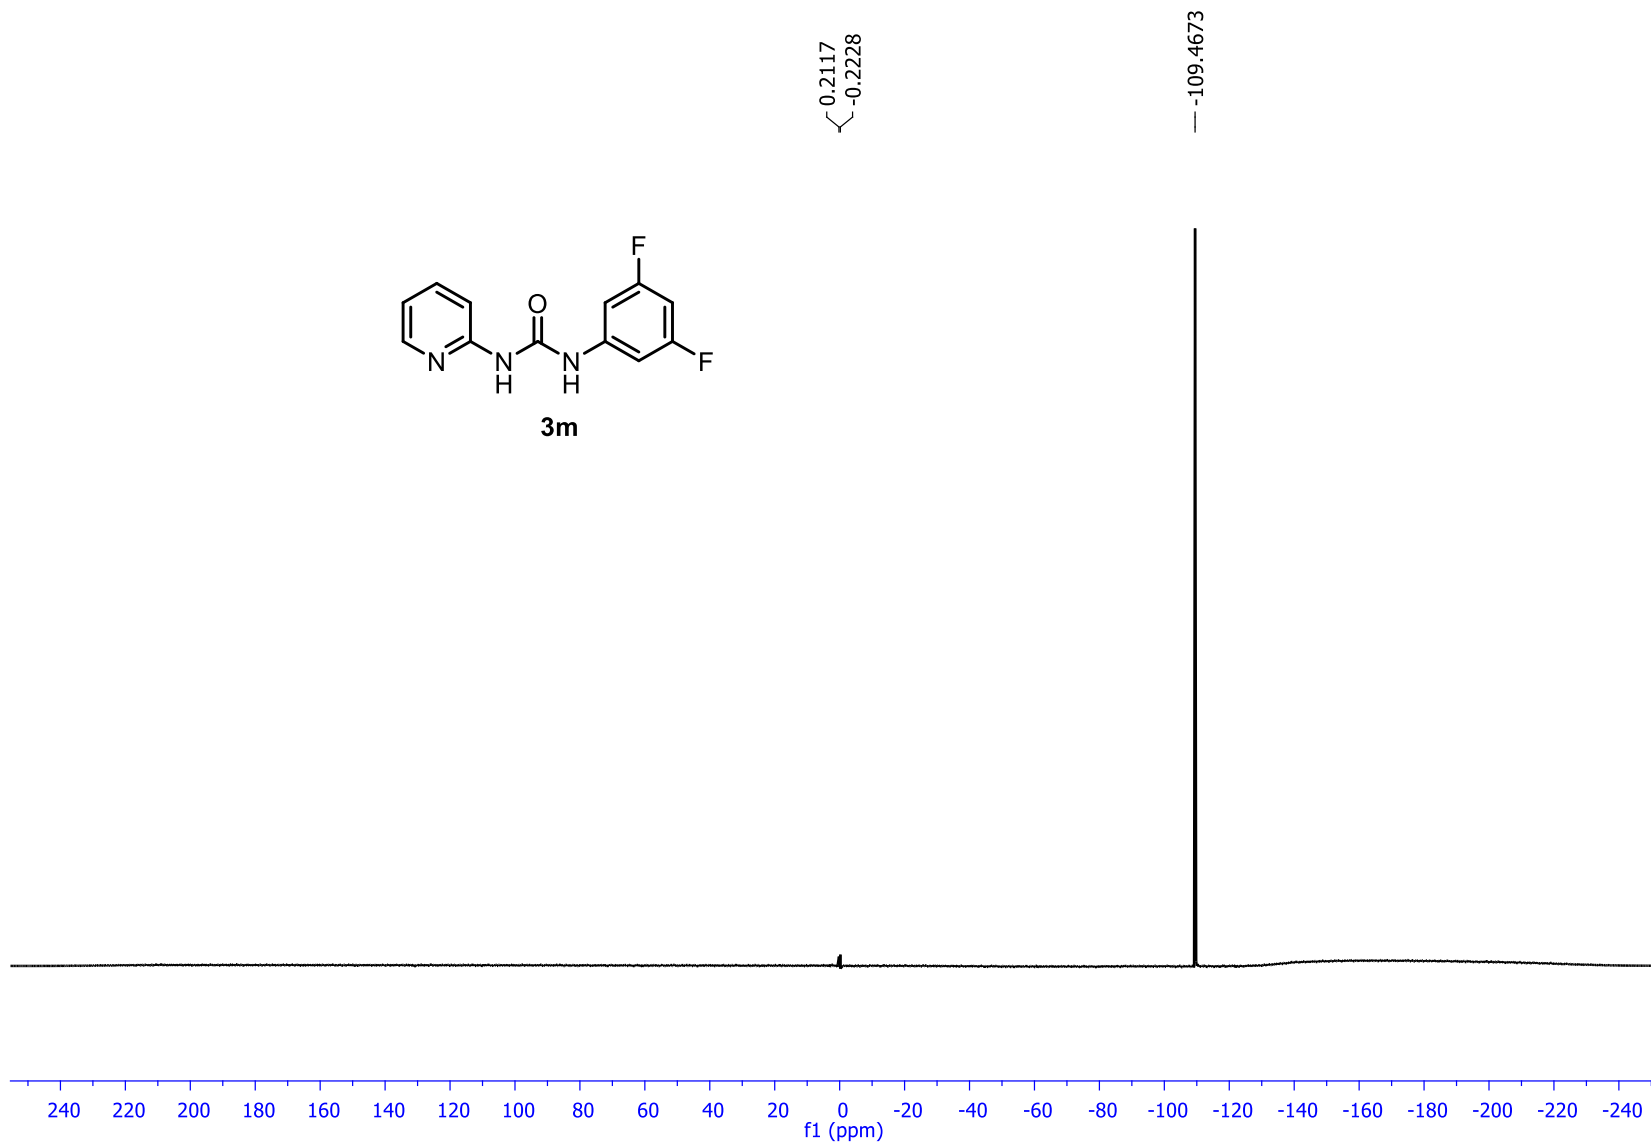

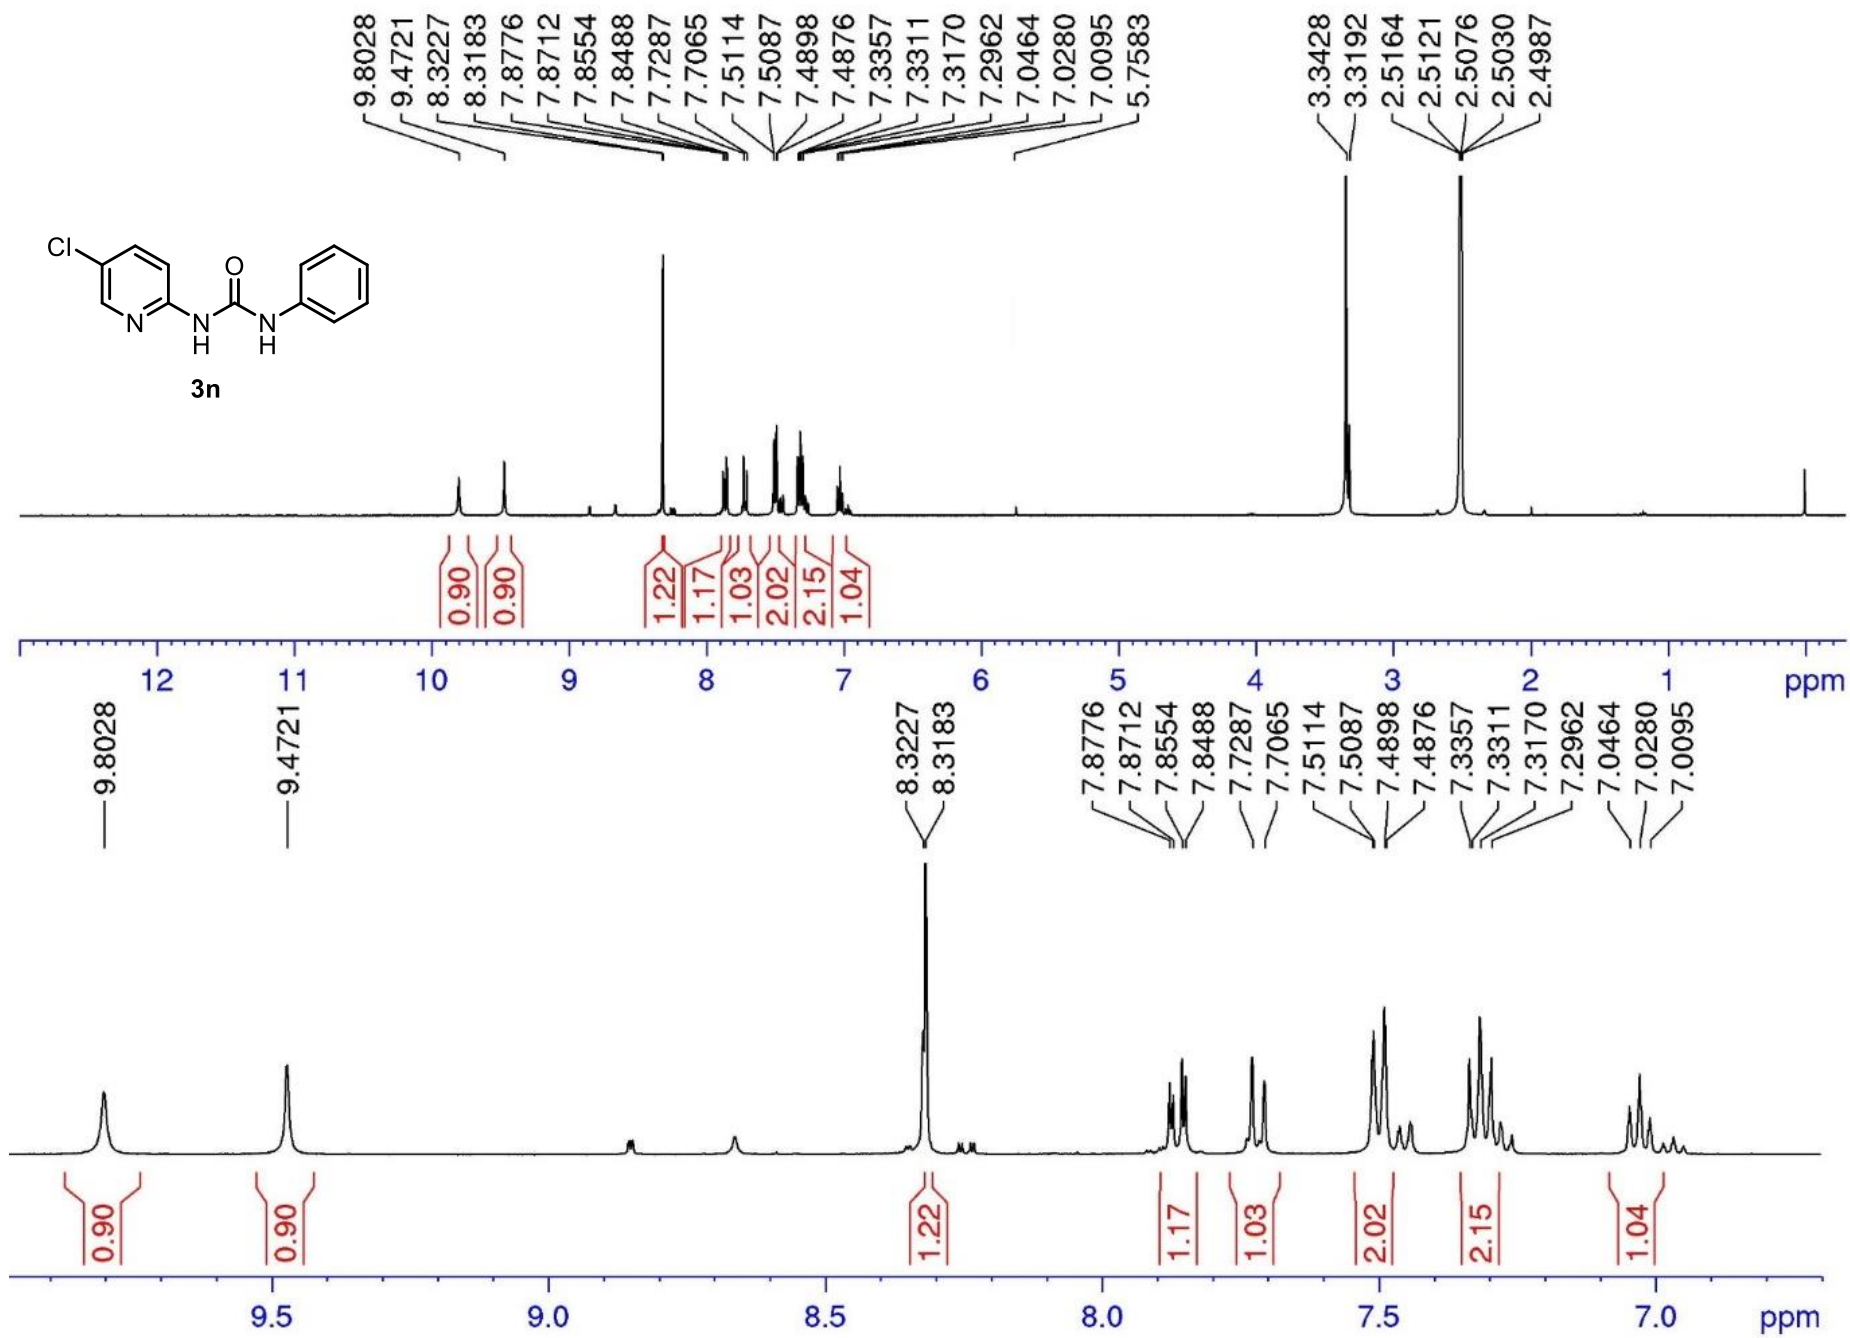

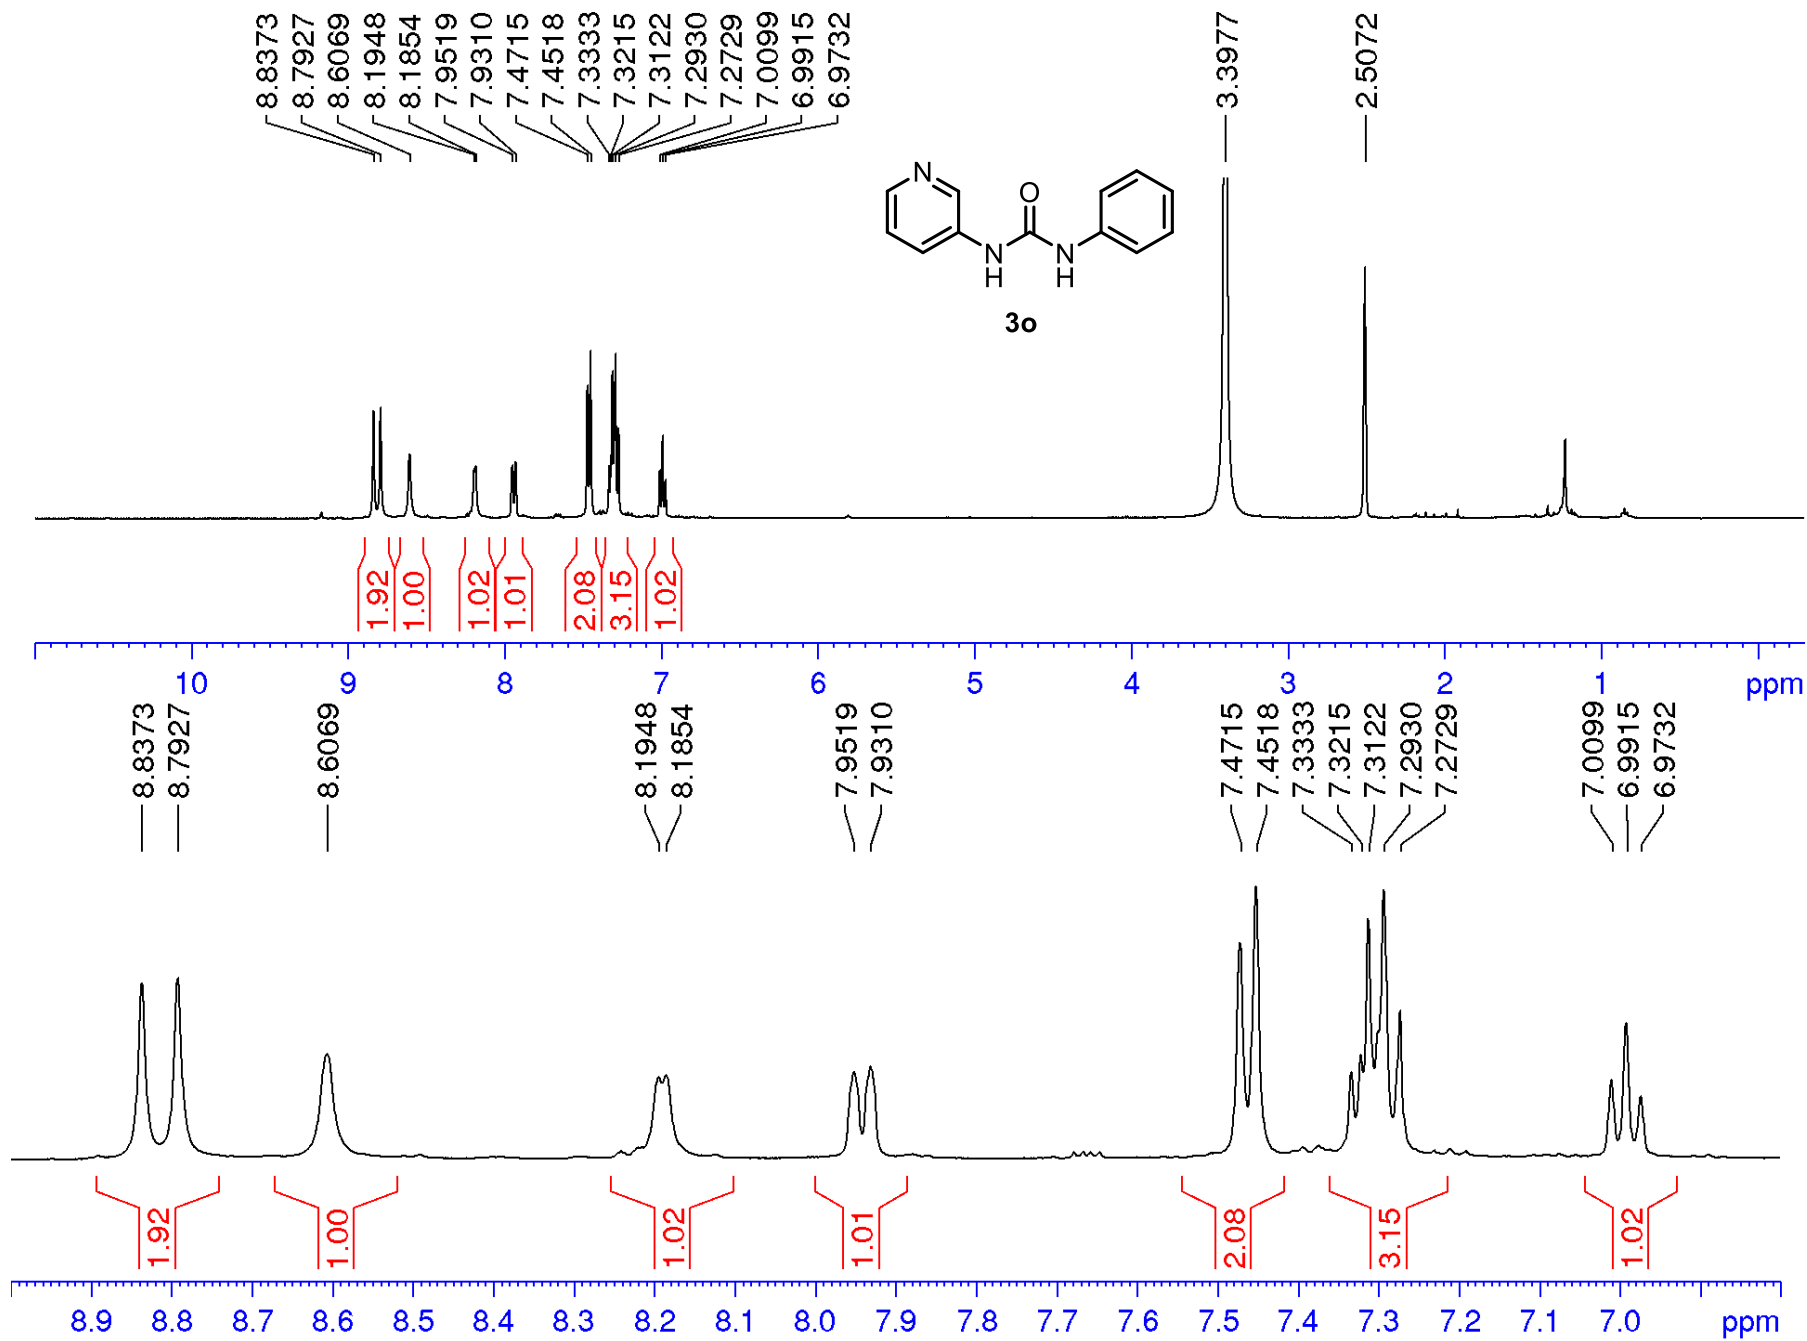



152.55  
142.81  
140.02  
139.35  
136.39  
128.77  
125.17  
123.58  
122.10  
118.39

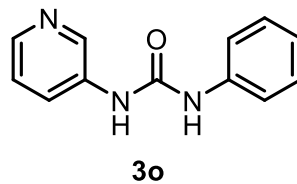

40.07  
39.86  
39.65  
39.44  
39.24  
39.03  
38.82

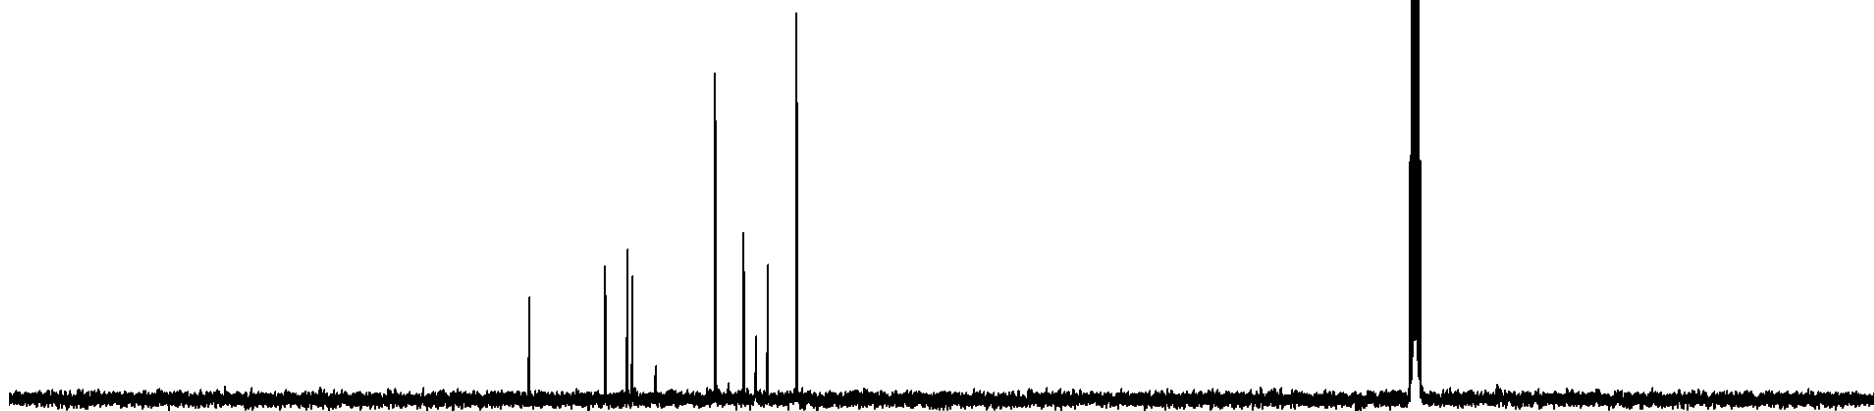

200 180 160 140 120 100 80 60 40 20 0 ppm

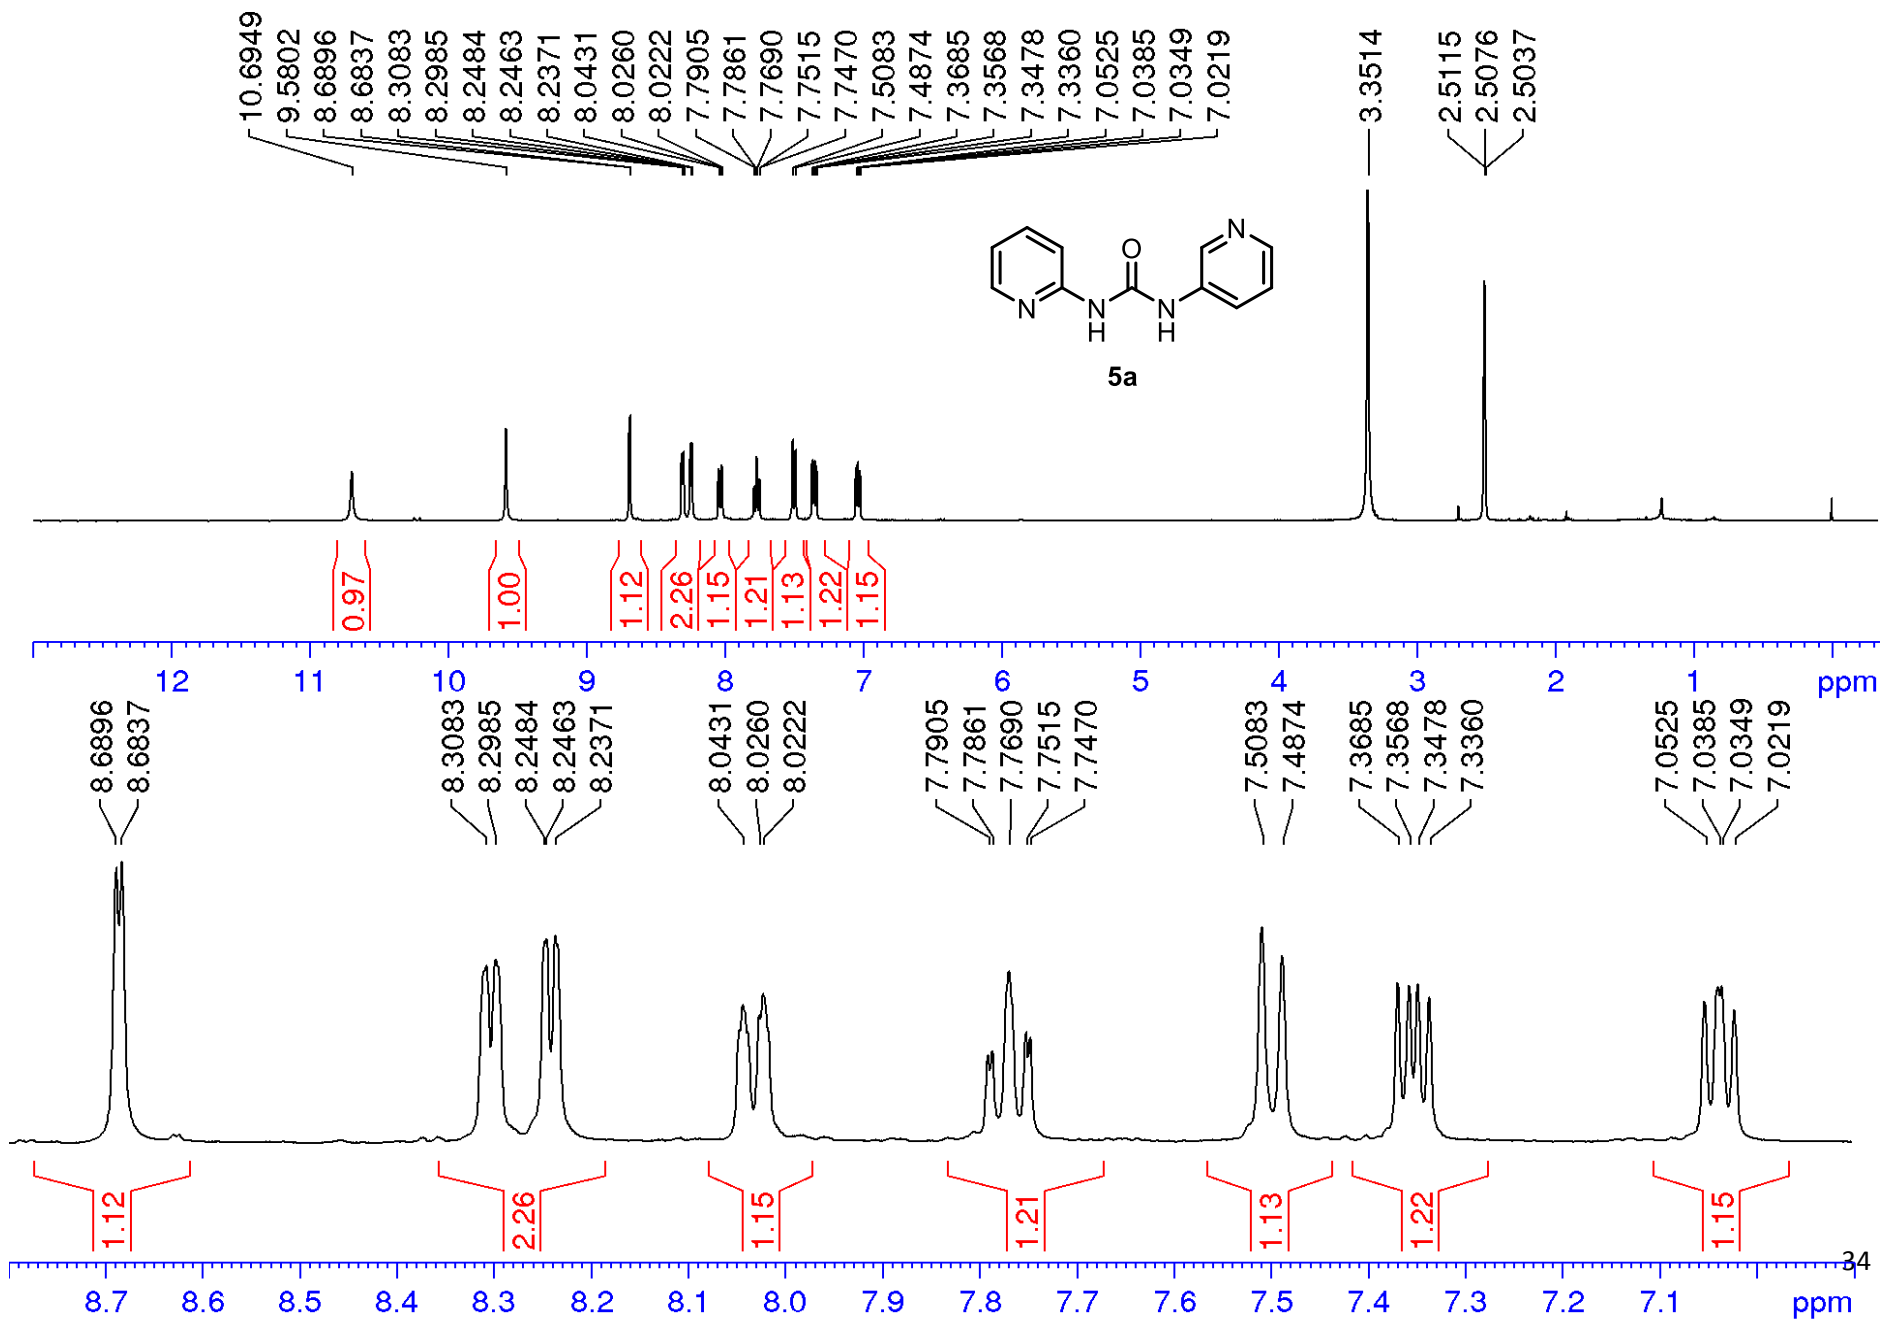

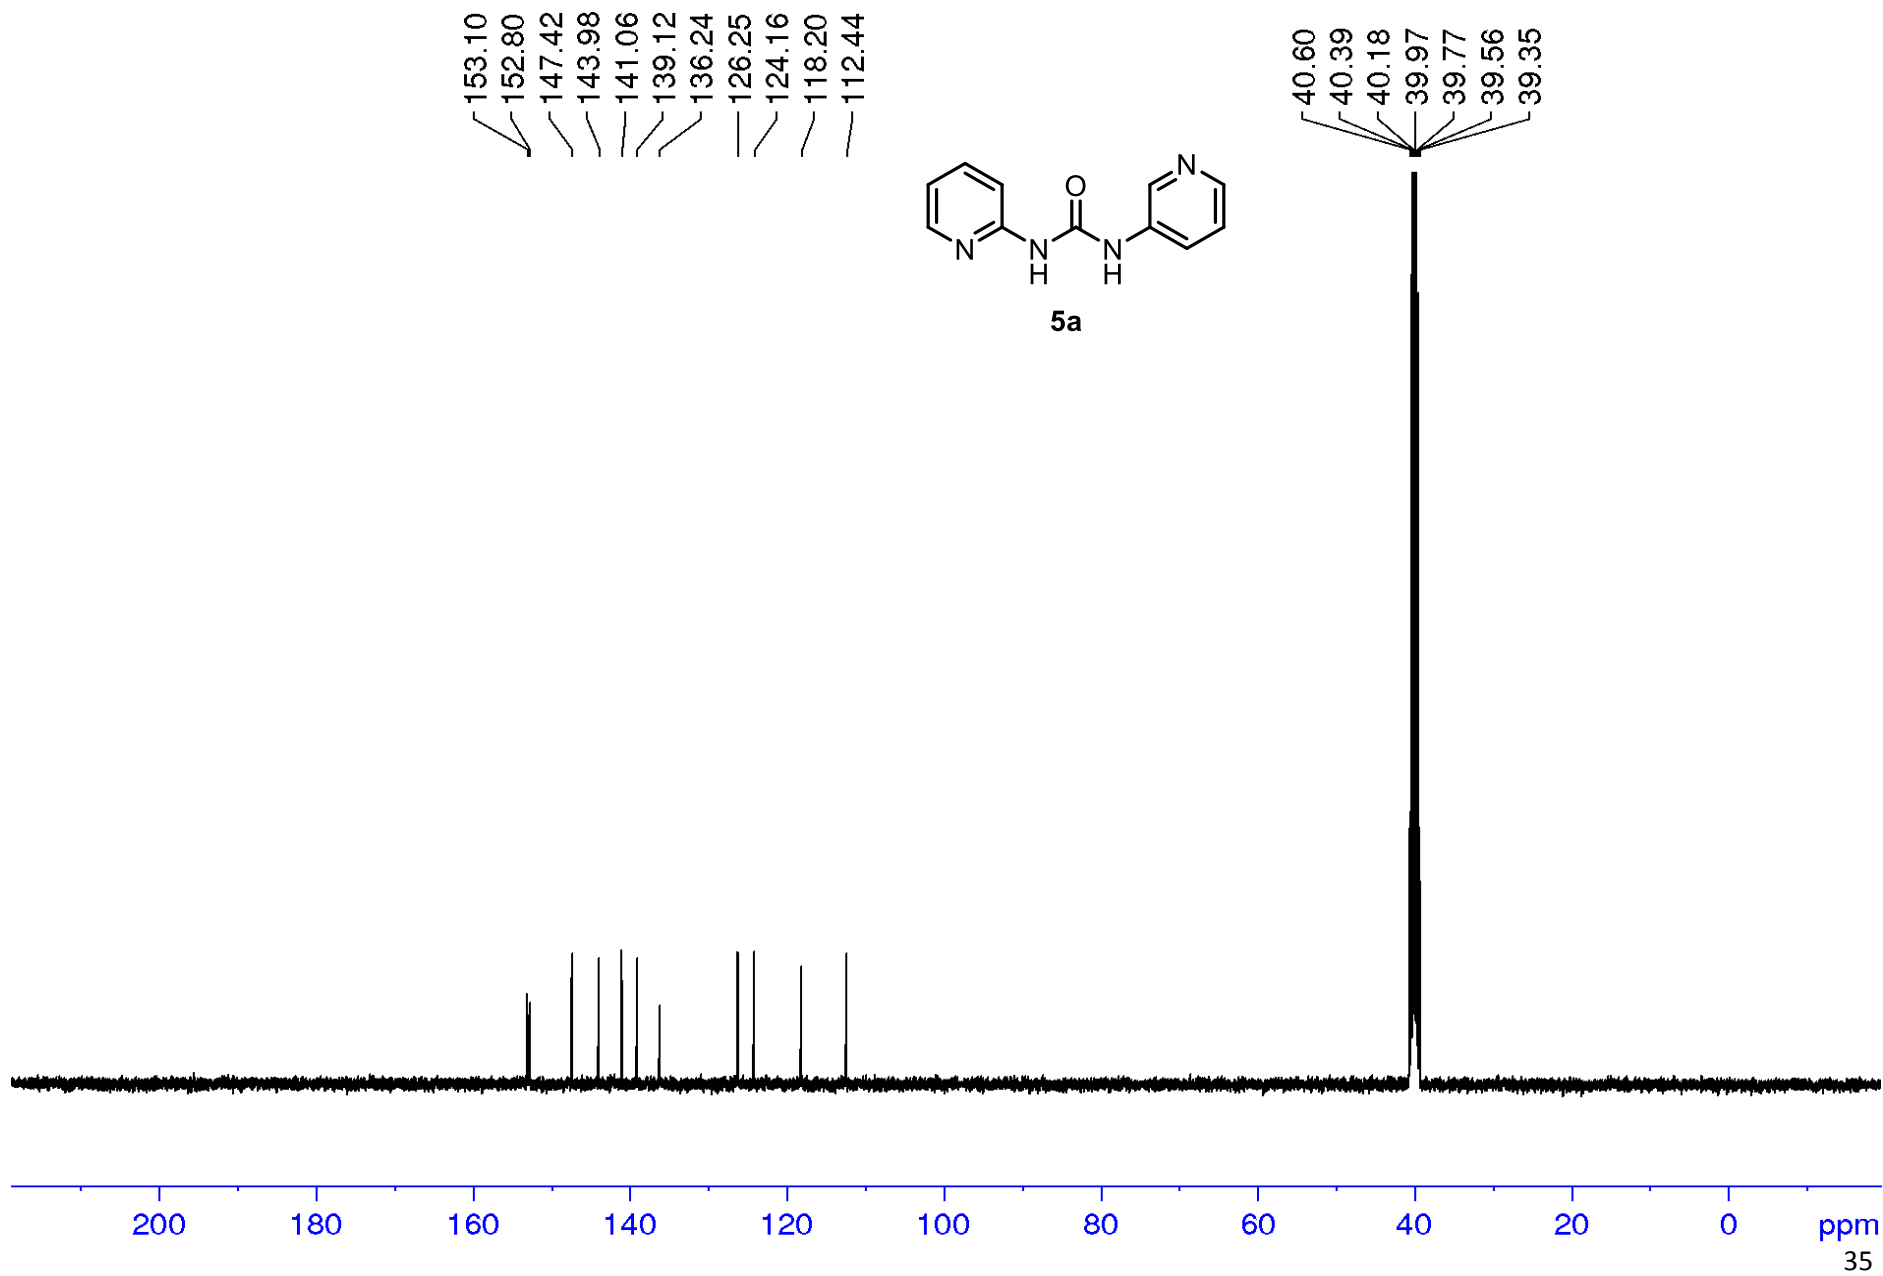

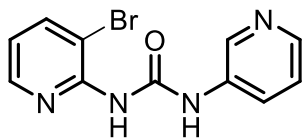

**5b**

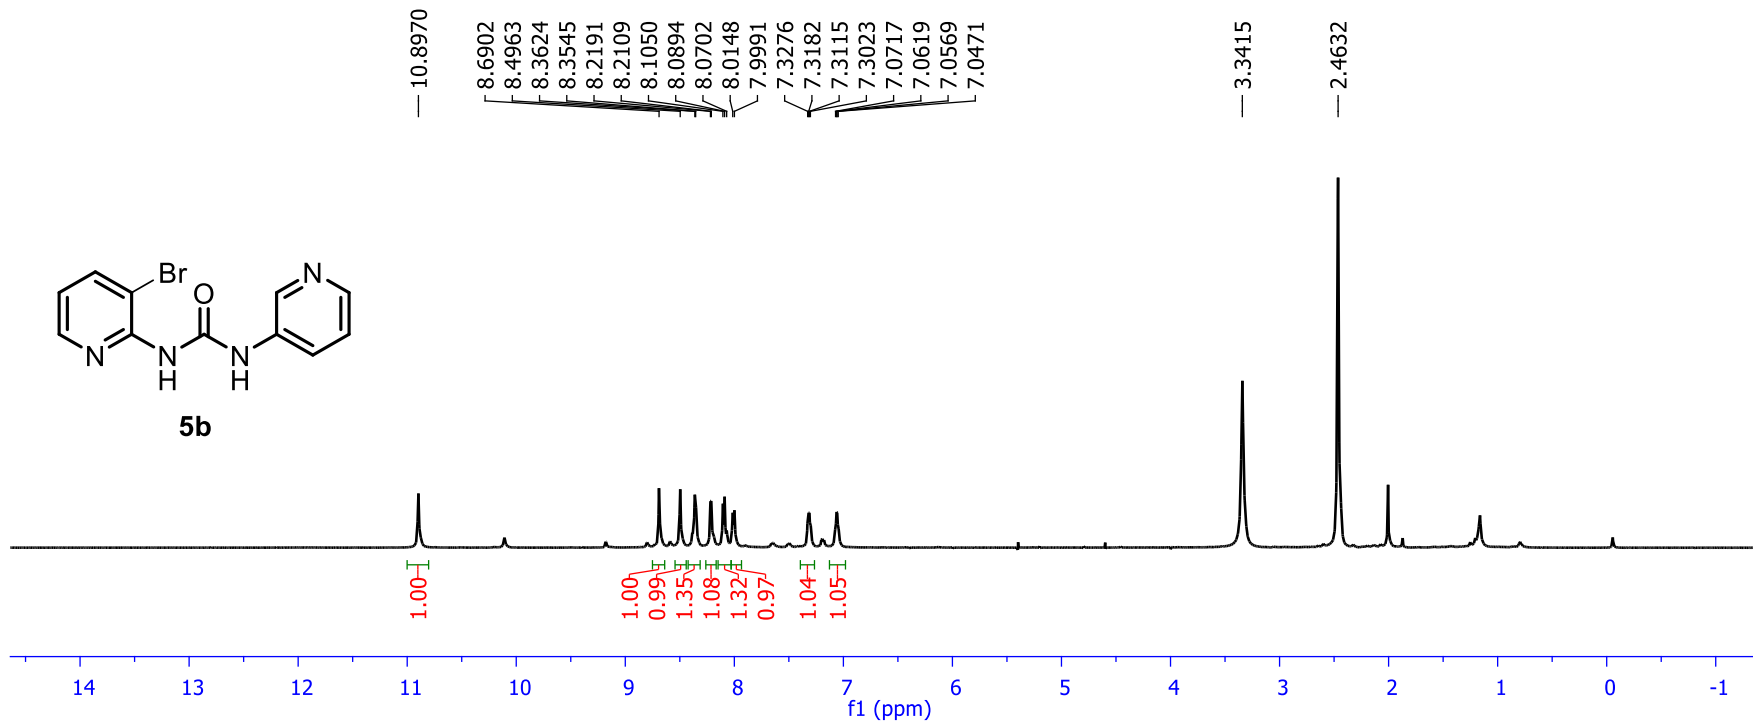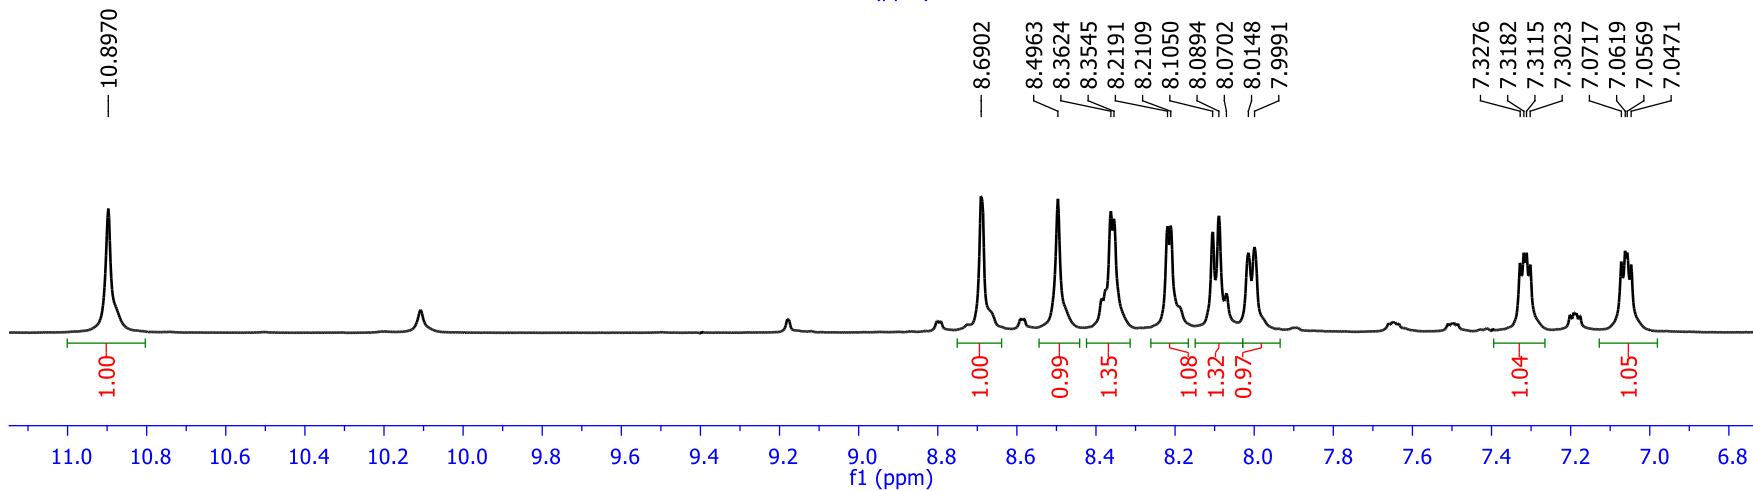

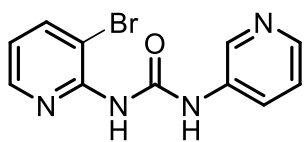

5b

152.0480  
149.7096  
146.5857  
144.3506  
142.9139  
141.5052  
136.0196  
126.7215  
124.1934  
120.6244  
109.8184

40.6174  
40.5246  
40.4518  
40.3599  
40.2853  
40.1930  
40.0265  
39.8594  
39.6929  
39.5262

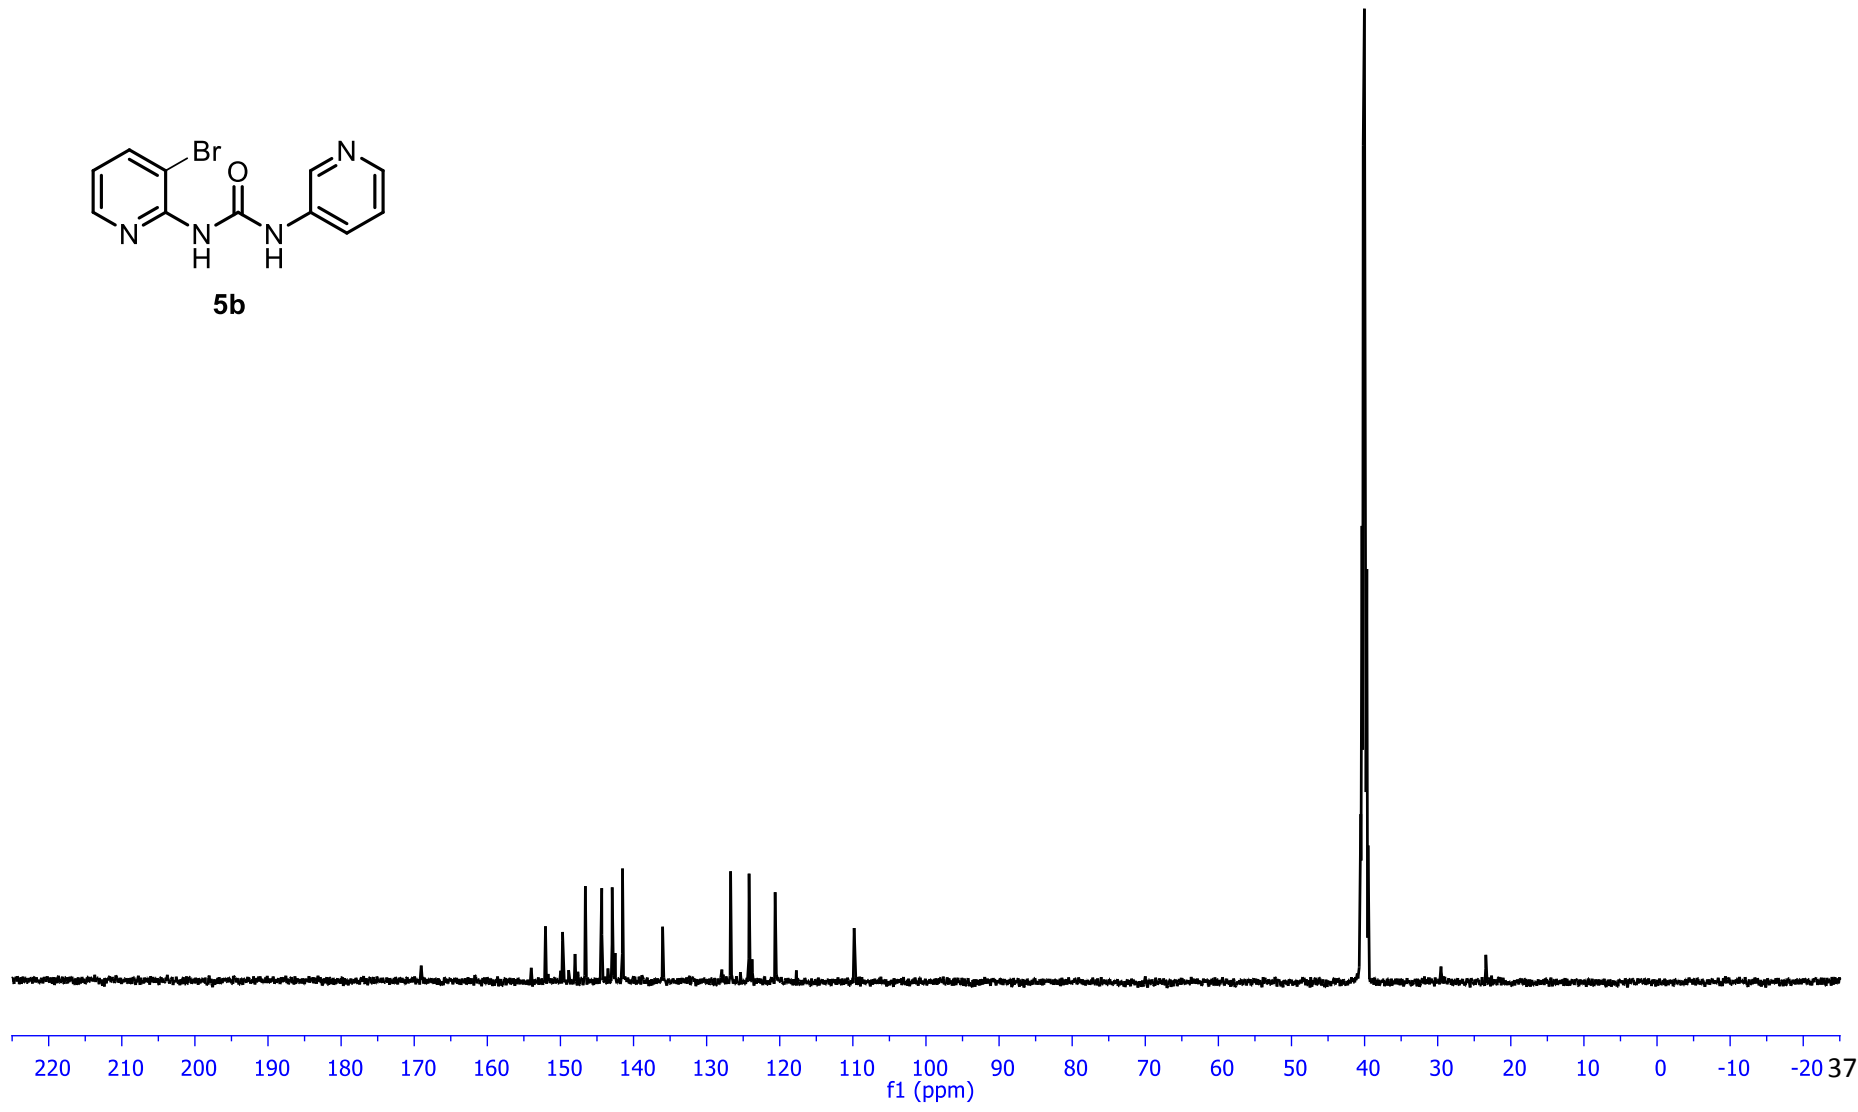

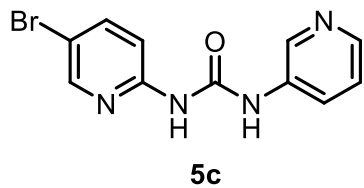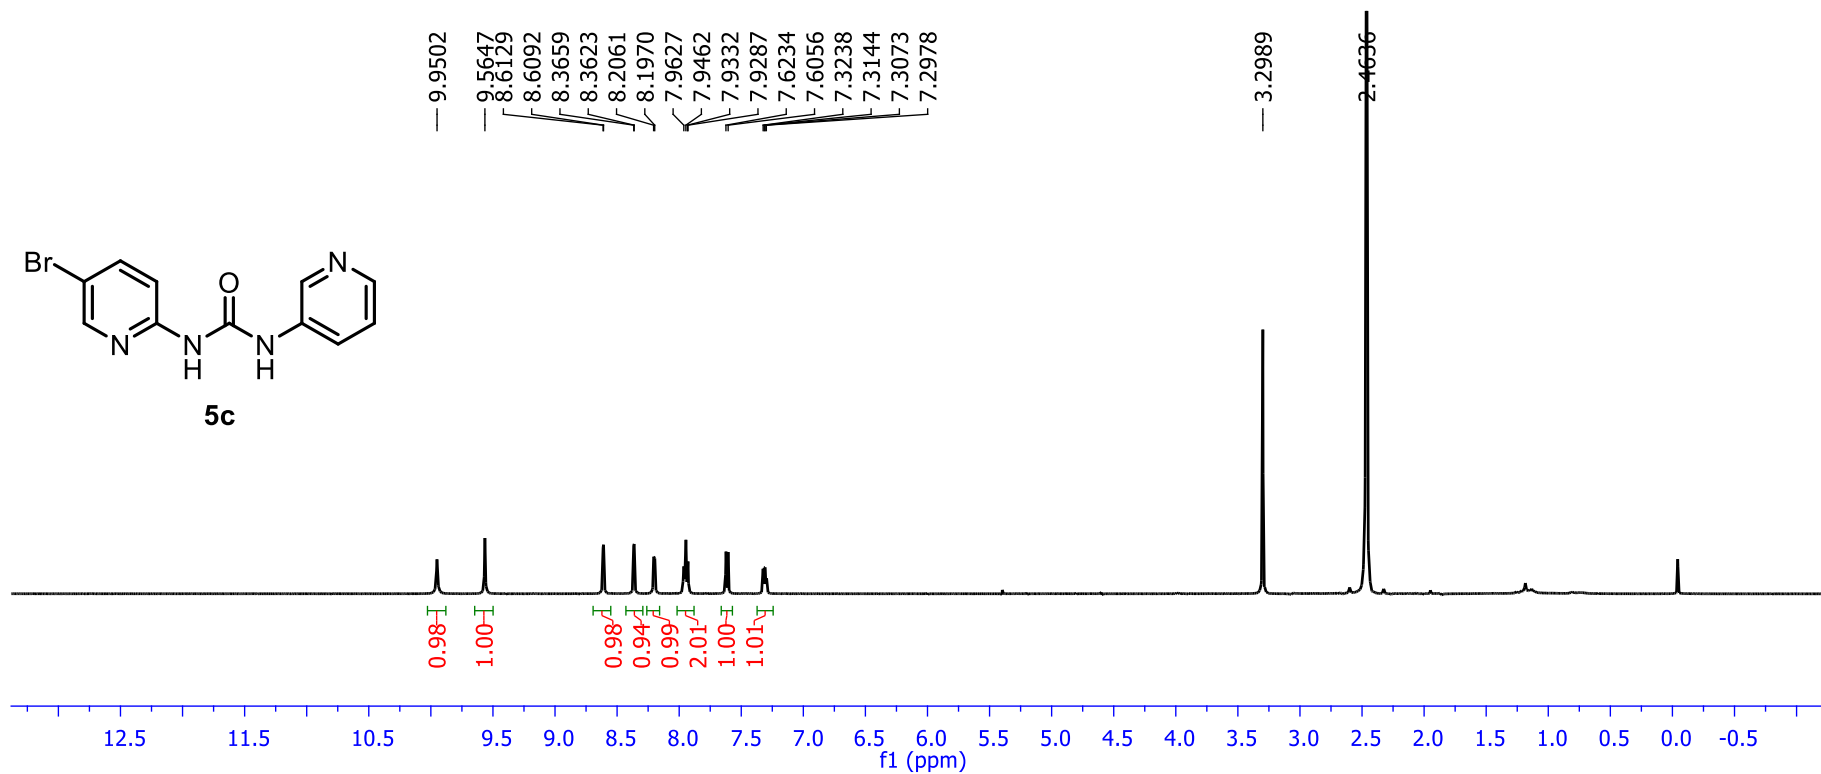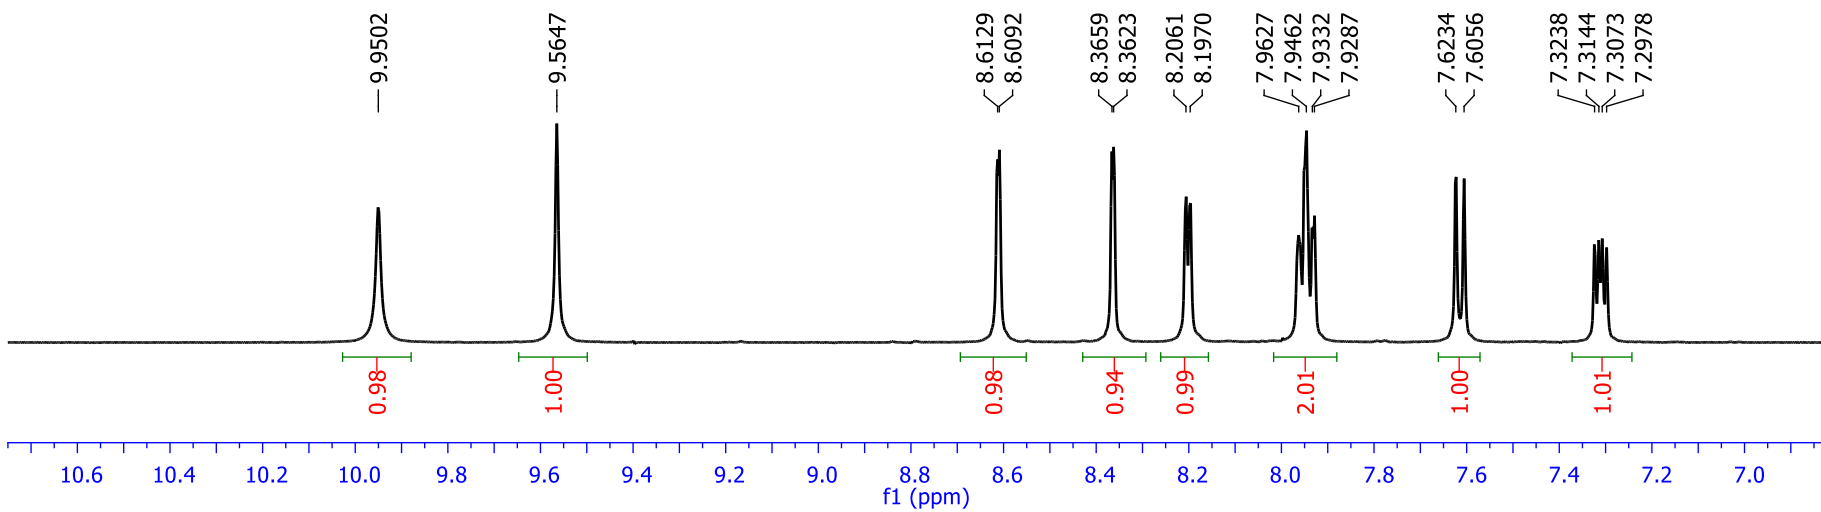

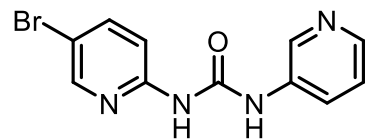

5c

152.5285  
152.0308  
148.3426  
144.1450  
141.4202  
141.0423  
136.1457  
126.2499  
124.2345  
114.2530  
112.3918

40.6330  
40.5407  
40.4663  
40.3740  
40.2989  
40.2076  
40.1331  
40.0404  
39.8740  
39.7068  
39.5404

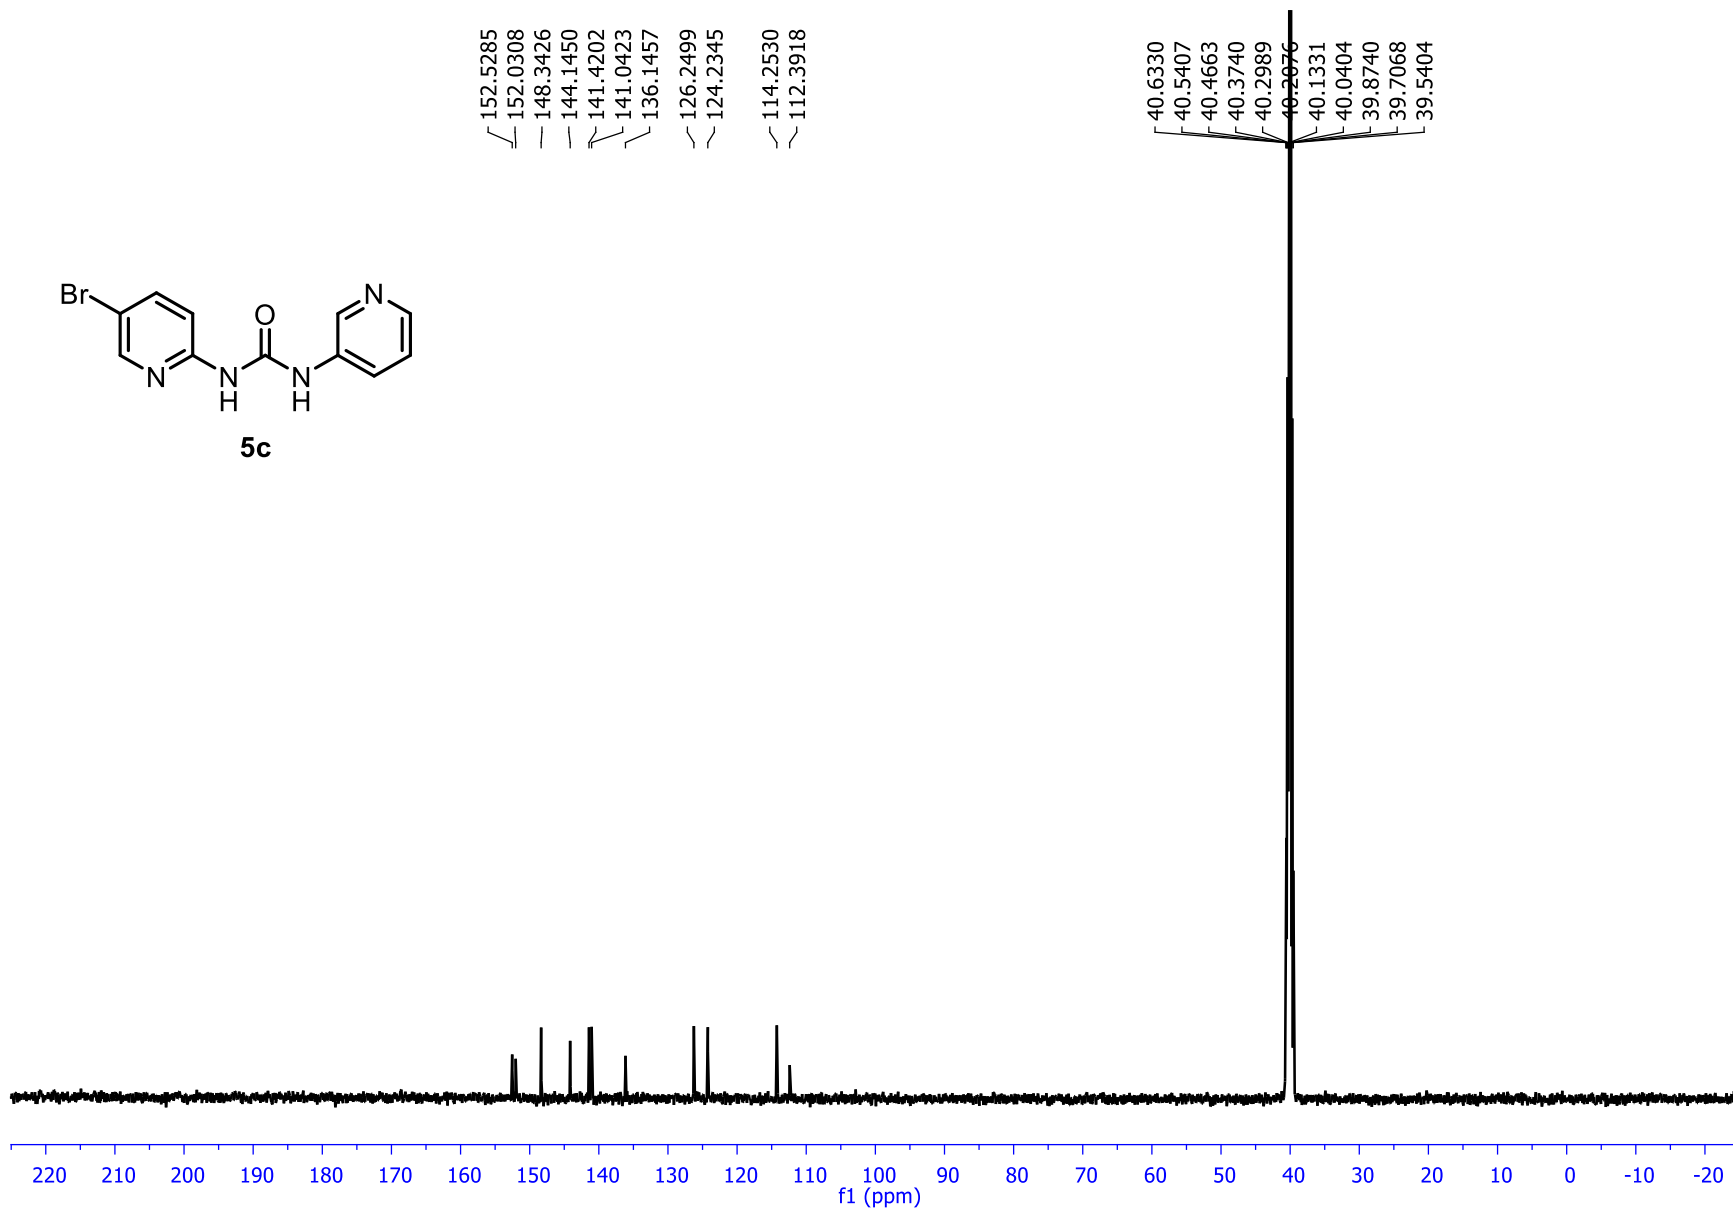

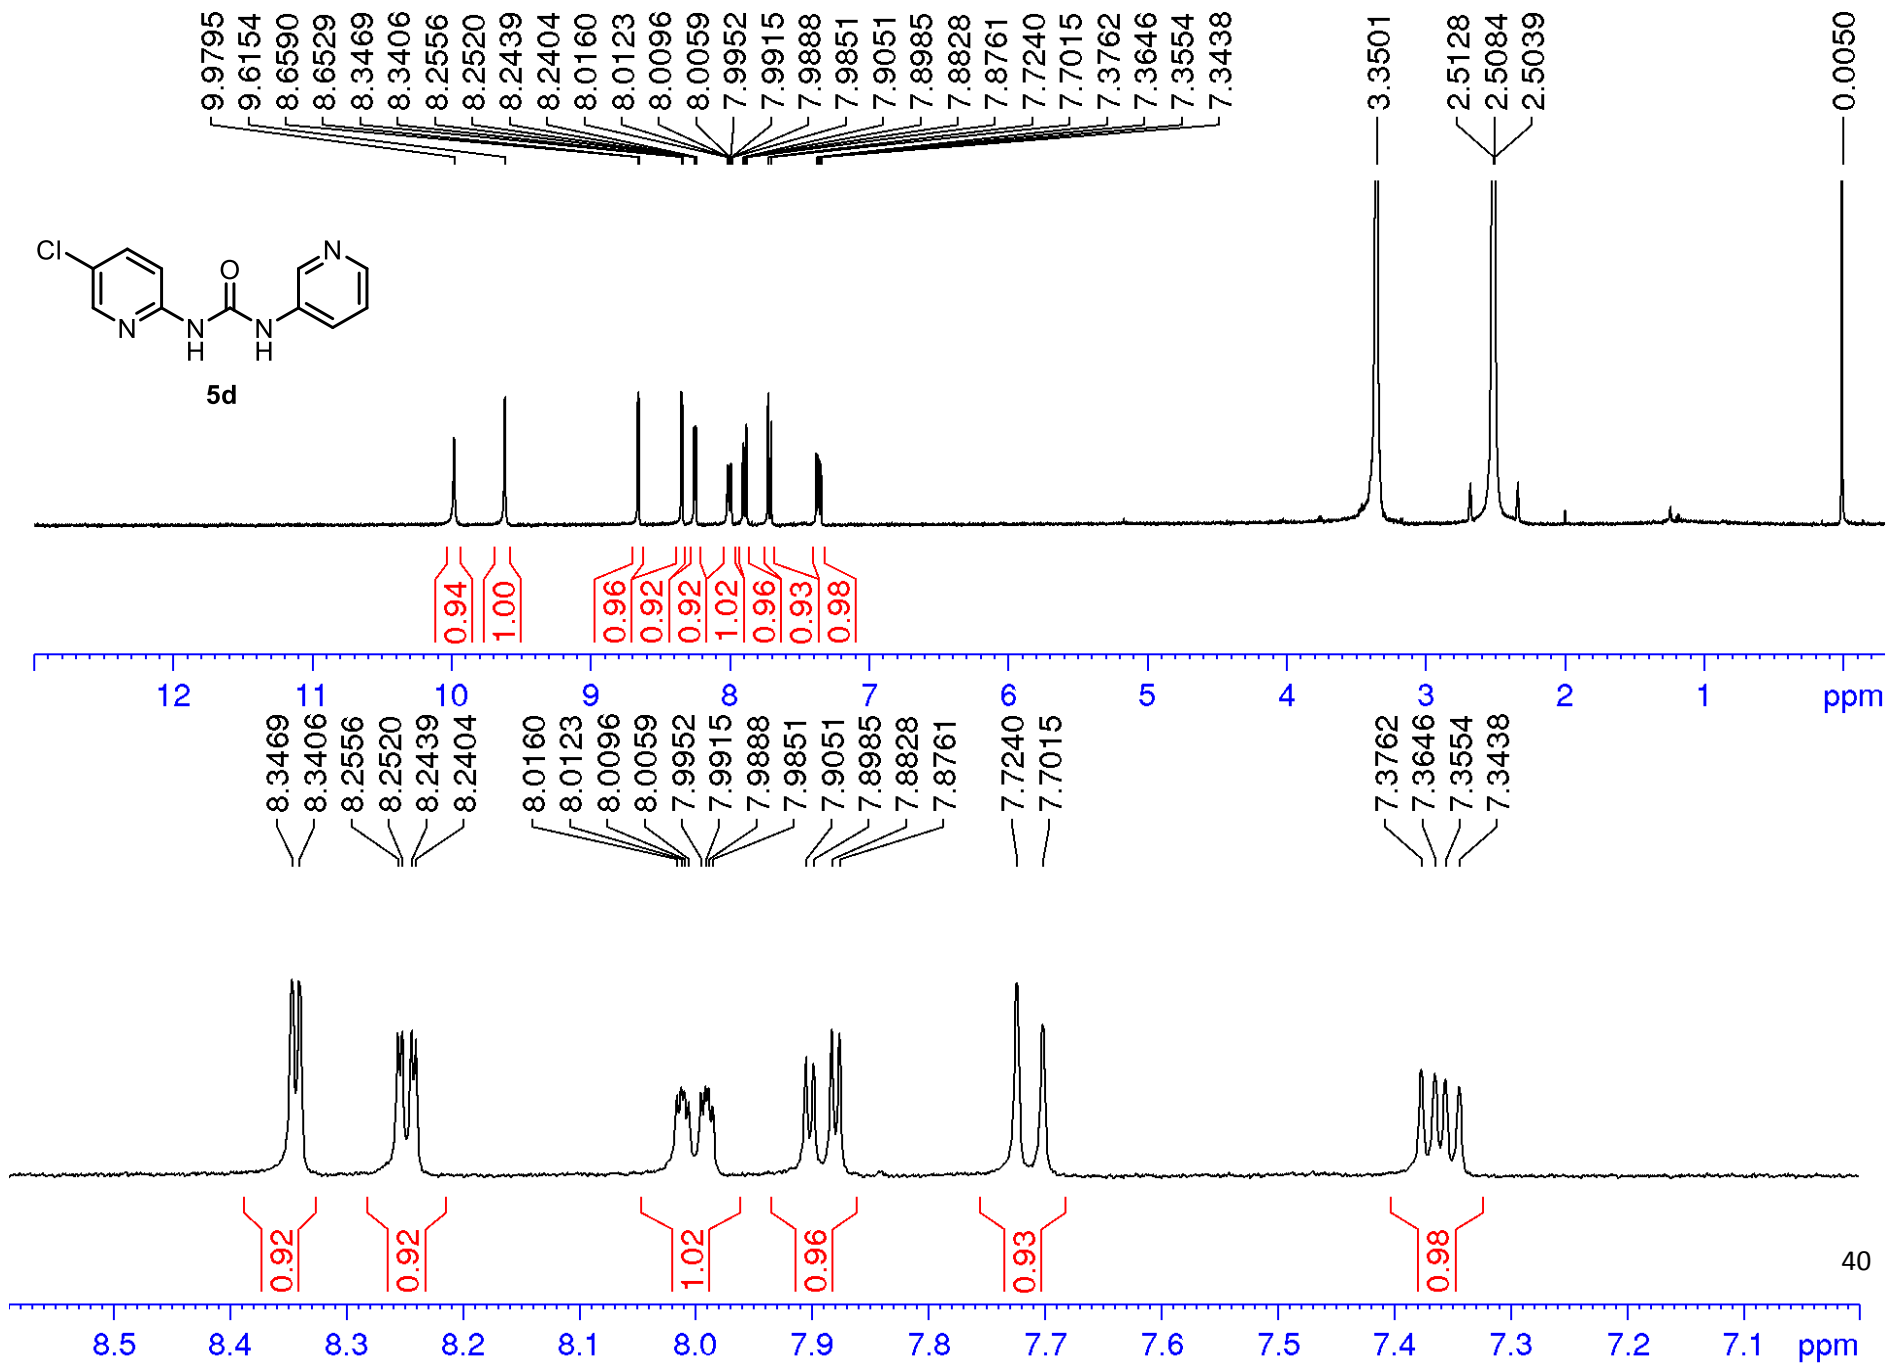



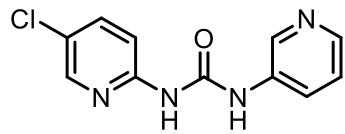

5d

152.5437  
151.7302  
146.1514  
144.1309  
141.0128  
138.7954  
136.1530  
126.2739  
124.2596  
113.7034

40.5635  
40.4743  
40.3975  
40.3071  
40.2304  
40.1487  
40.0649  
39.9735  
39.8070  
39.6398  
39.4732

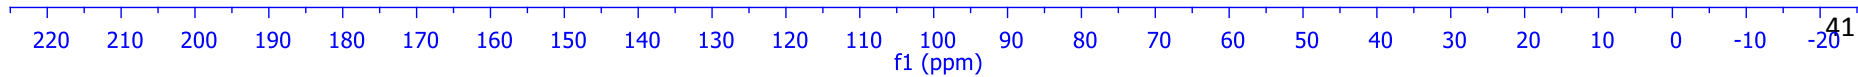

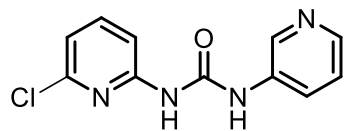

5e

9.6214  
9.3768  
8.5686  
8.2044  
8.1965  
7.9200  
7.9041  
7.7673  
7.7522  
7.7421  
7.7203  
7.3110  
7.3046  
7.2952  
7.0836  
7.0694  
3.3120  
2.4629

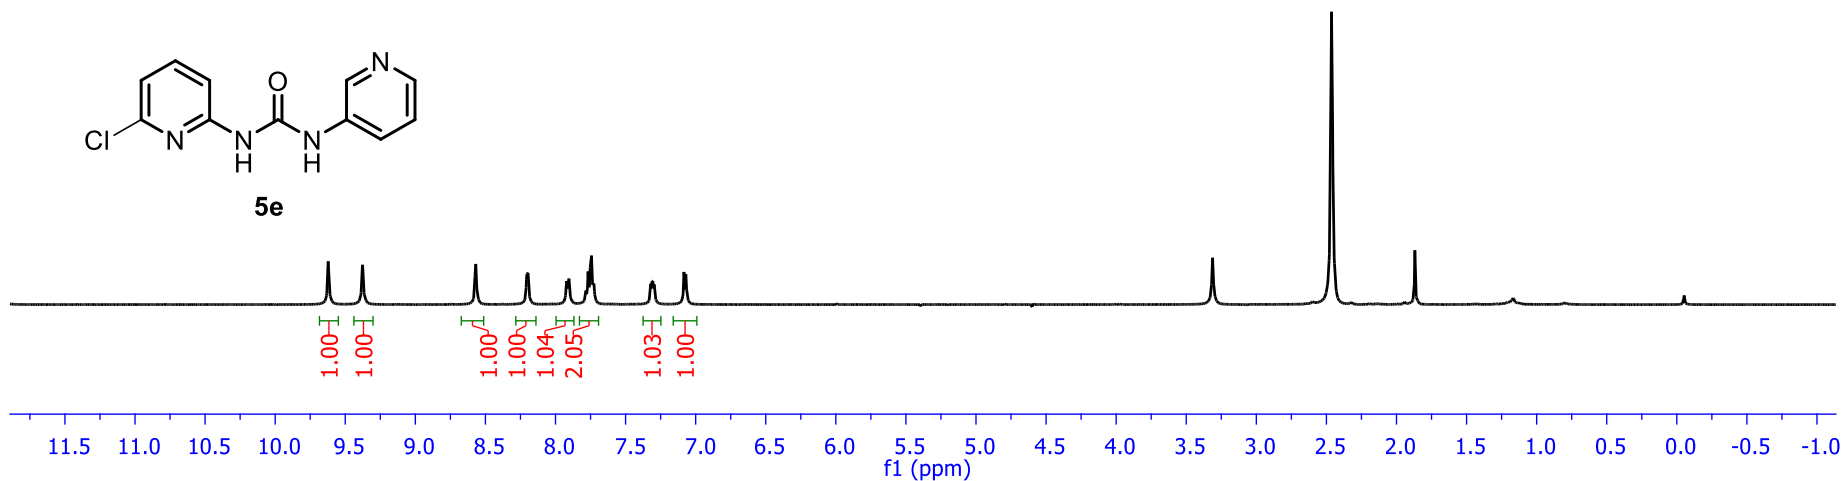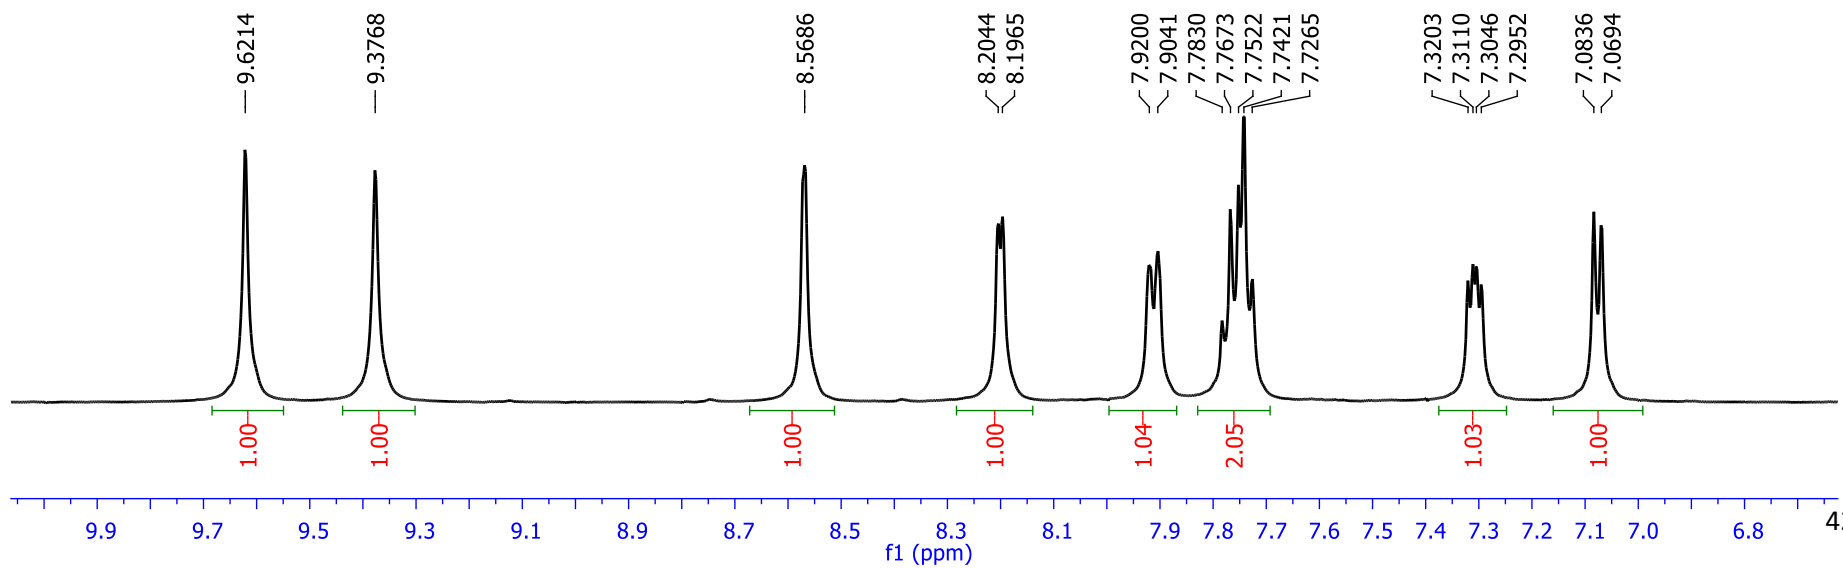

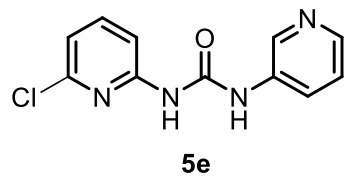

153.1025  
152.3027  
148.1404  
144.1619  
142.1968  
140.8614  
136.0872

126.1394  
124.2591  
118.0537

111.0039

40.6190  
40.5270  
40.4529  
40.3610  
40.2862  
40.1944  
40.1212  
40.0278  
39.8611  
39.6941  
39.5273

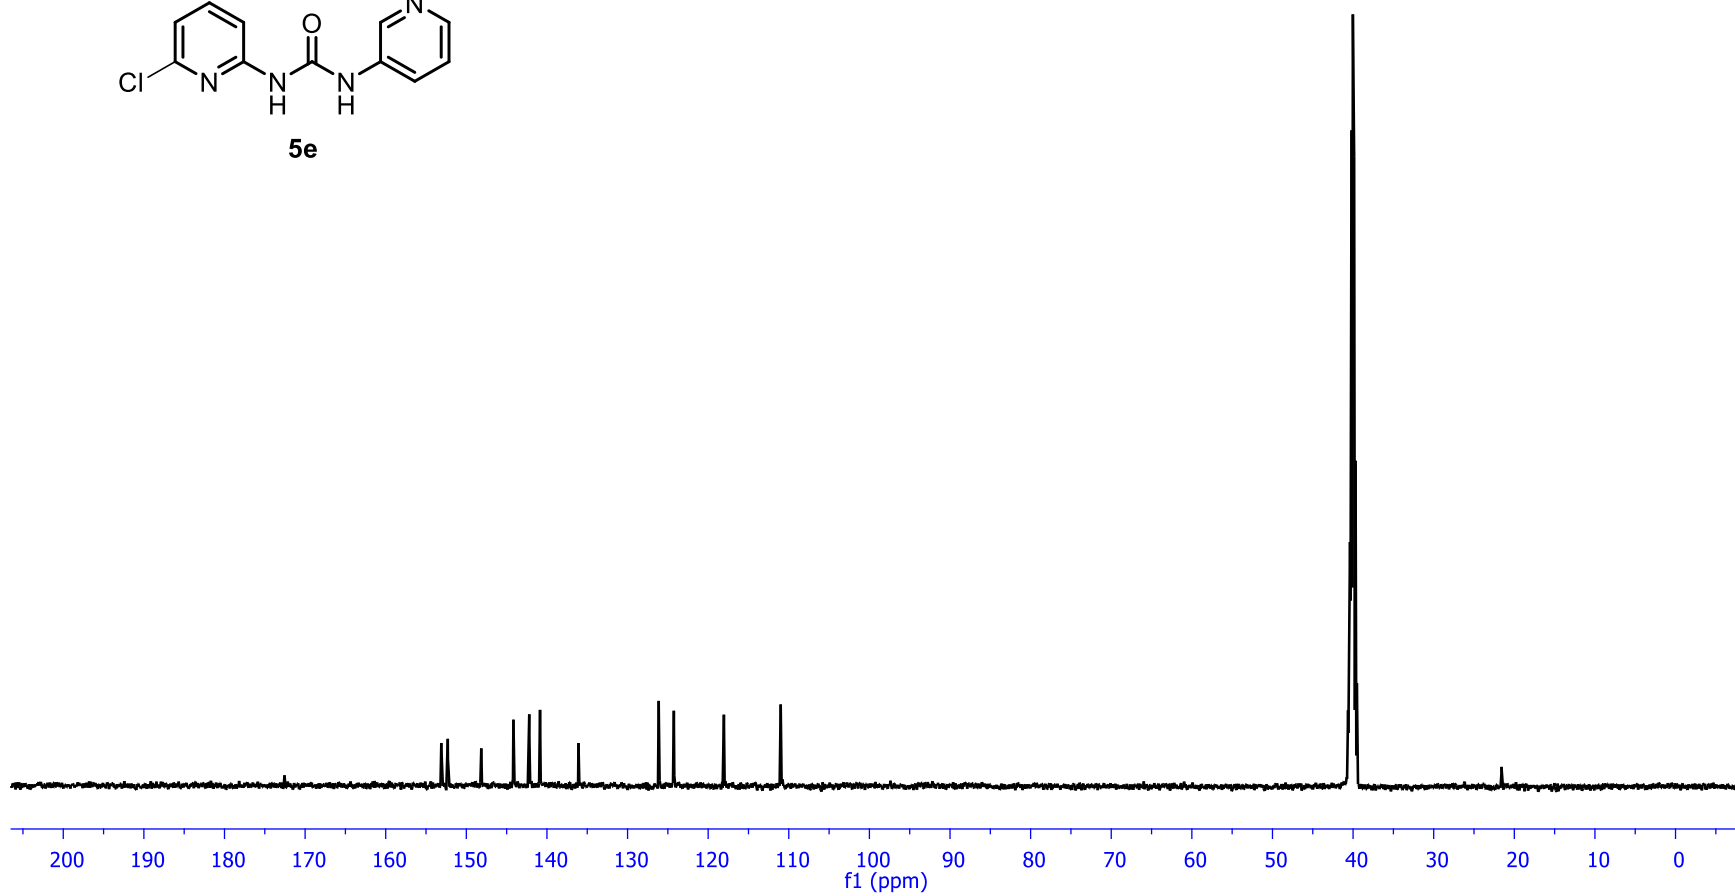

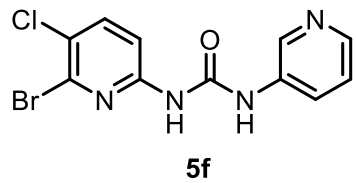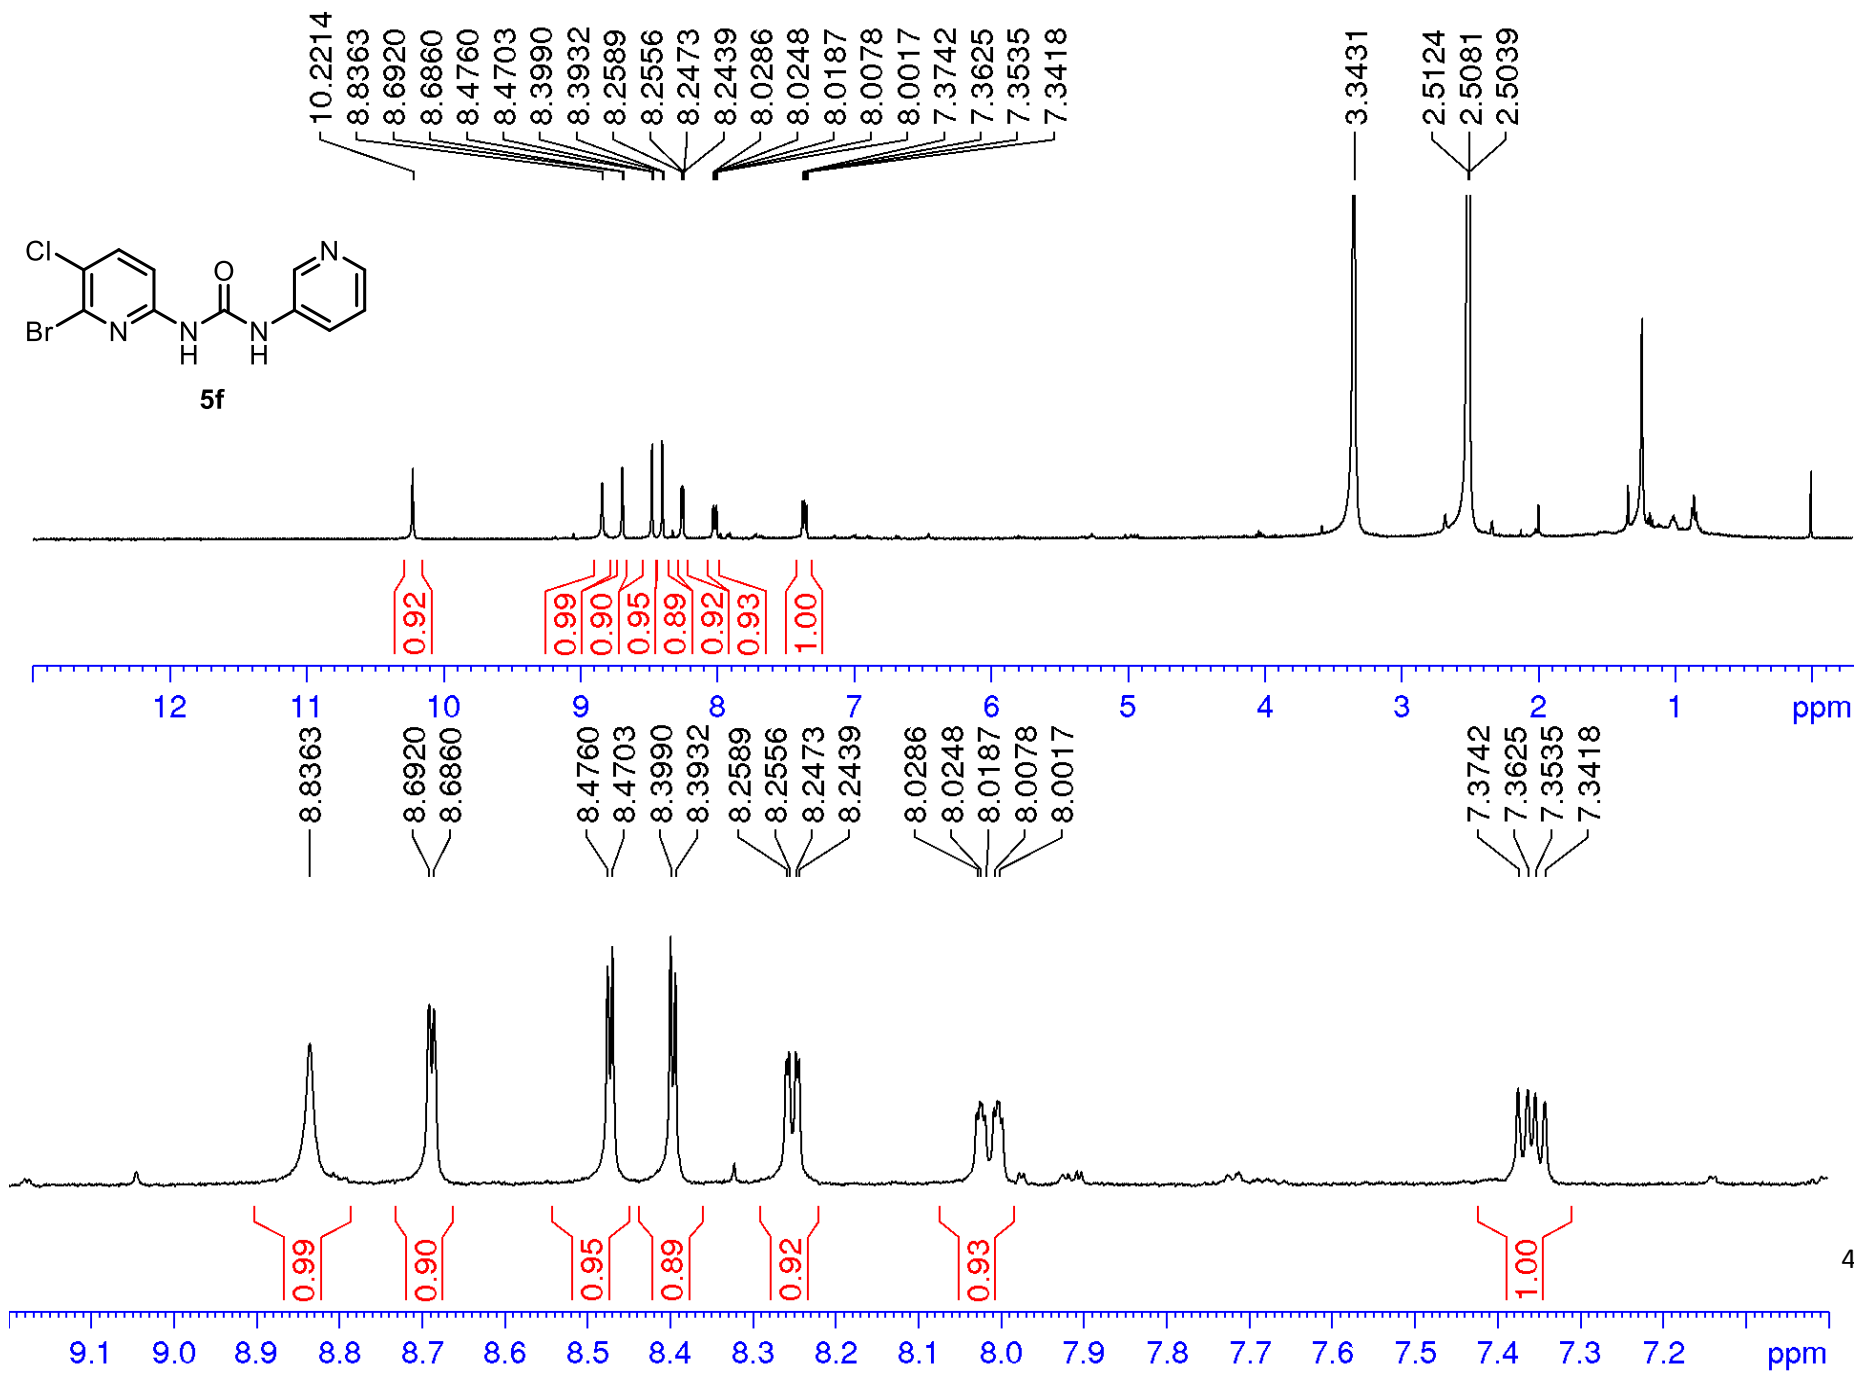

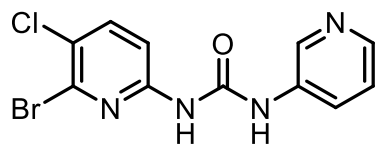

5f

- 151.9155
- 145.2730
- 144.2587
- 141.7452
- 141.2600
- 136.1373
- 126.5611
- 124.2420
- 111.5383

- 40.5064
- 40.4170
- 40.3394
- 40.2497
- 40.1718
- 40.0059
- 39.9159
- 39.7495
- 39.5820
- 39.4157

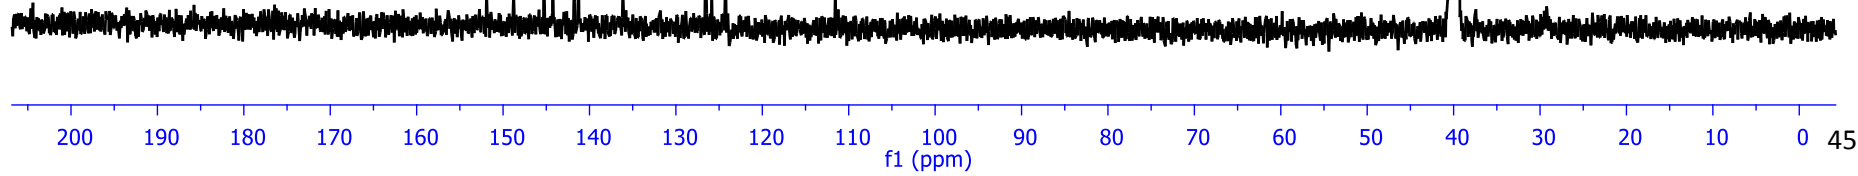

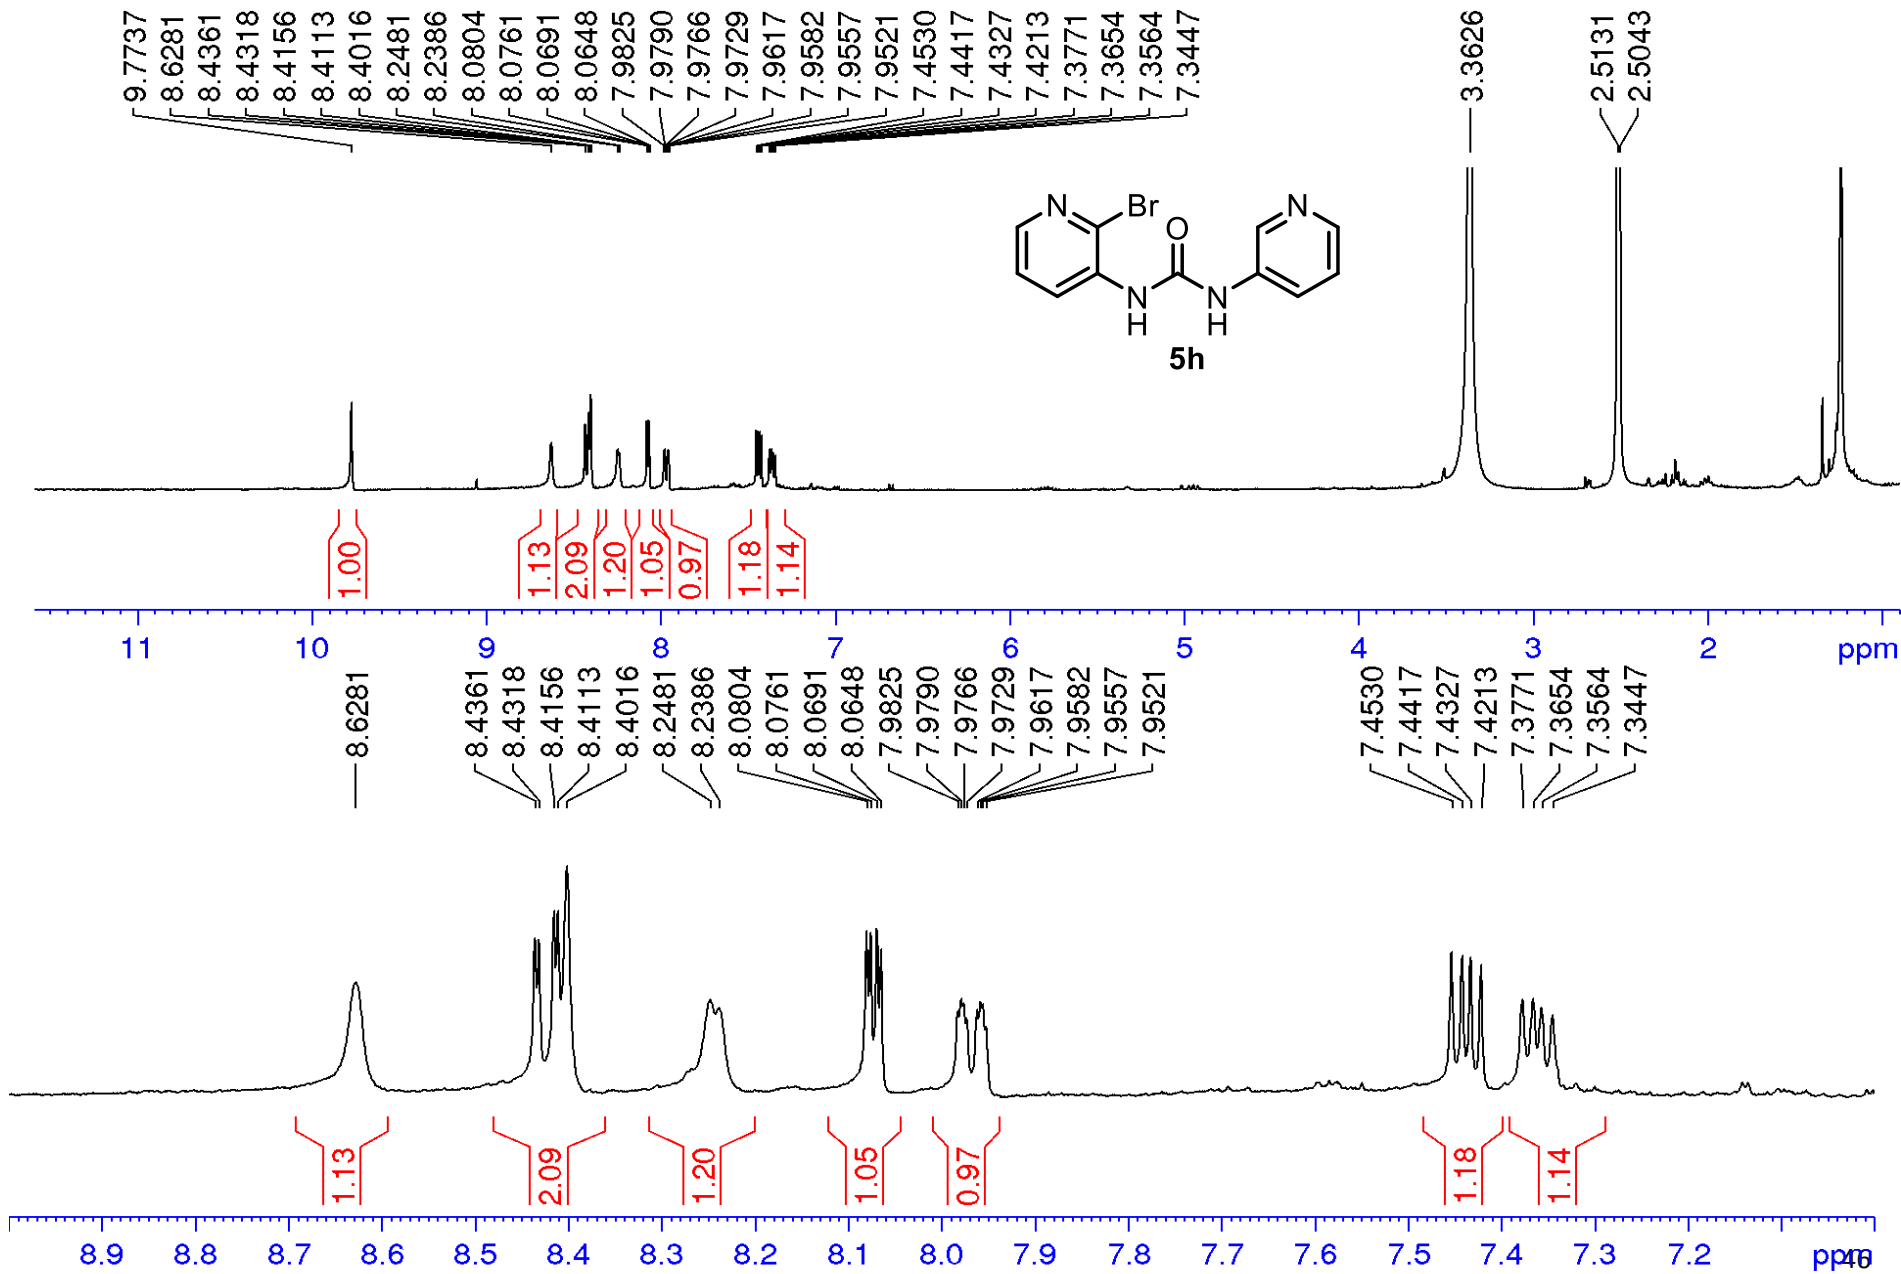

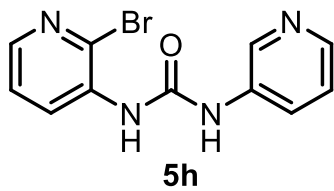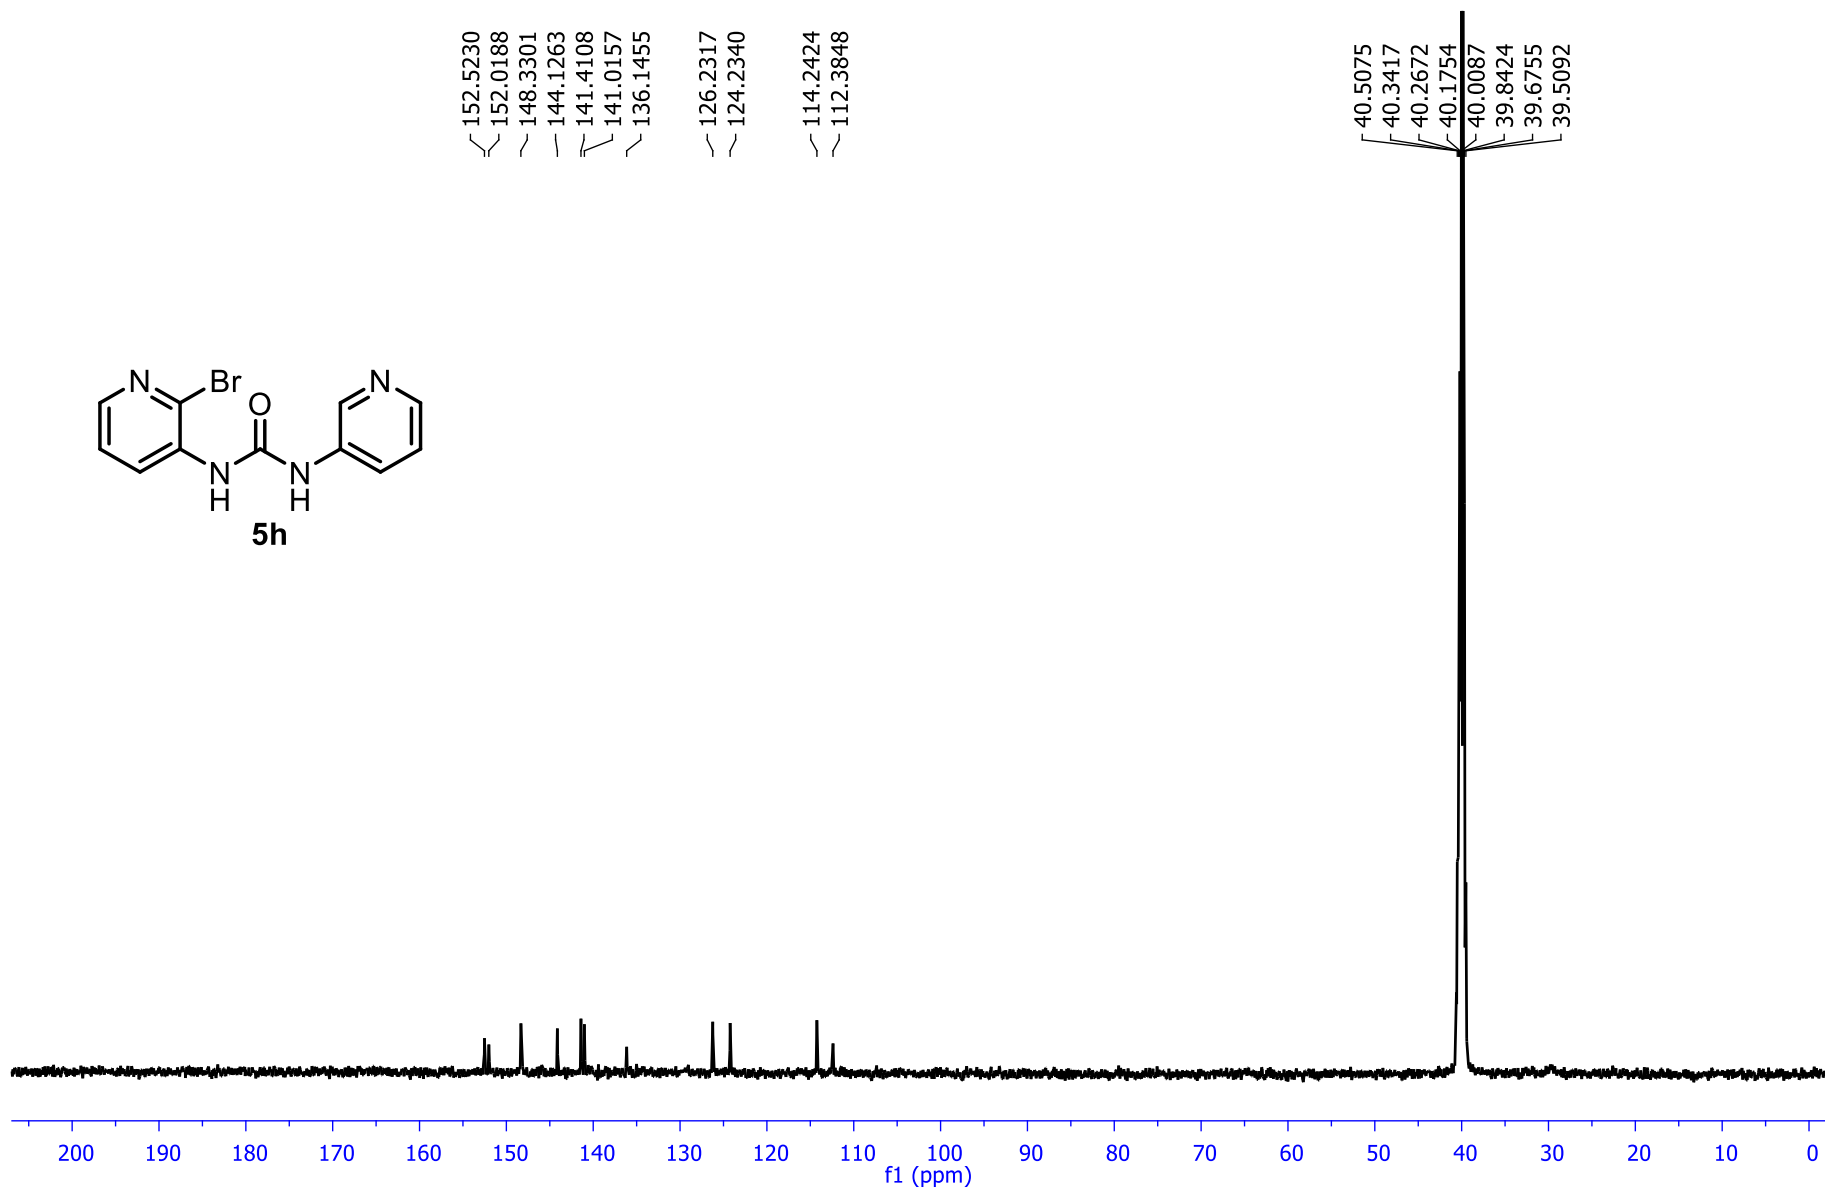

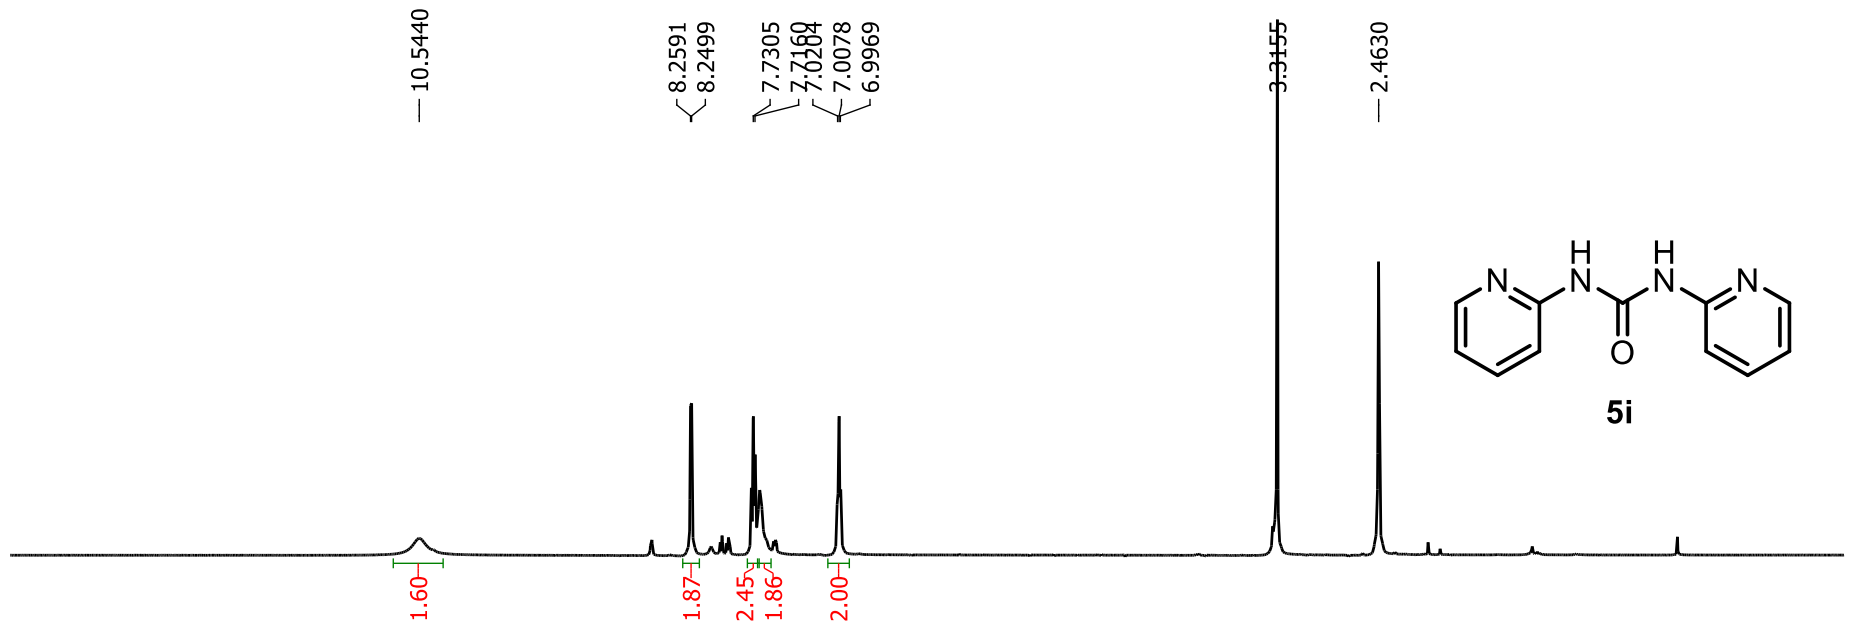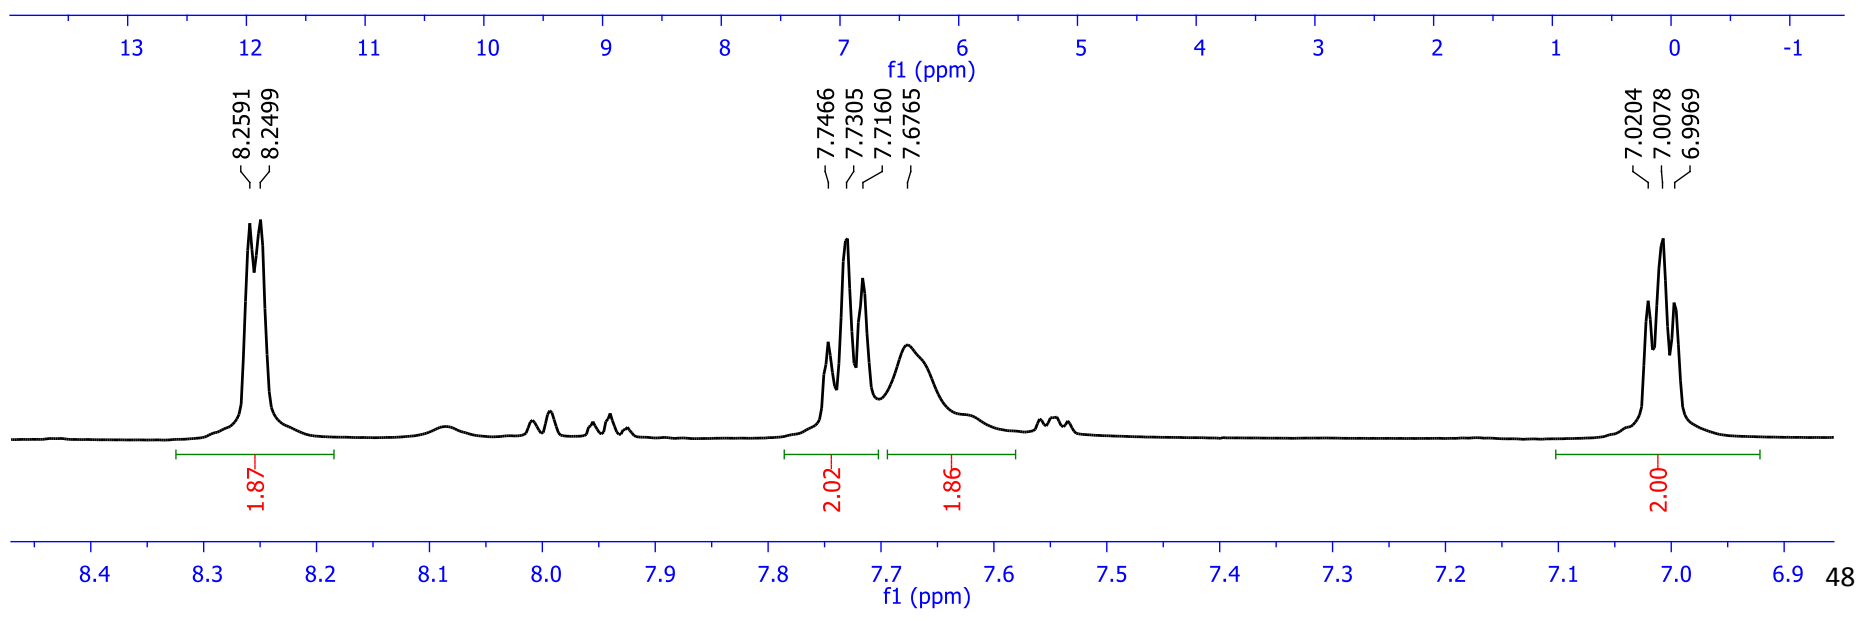



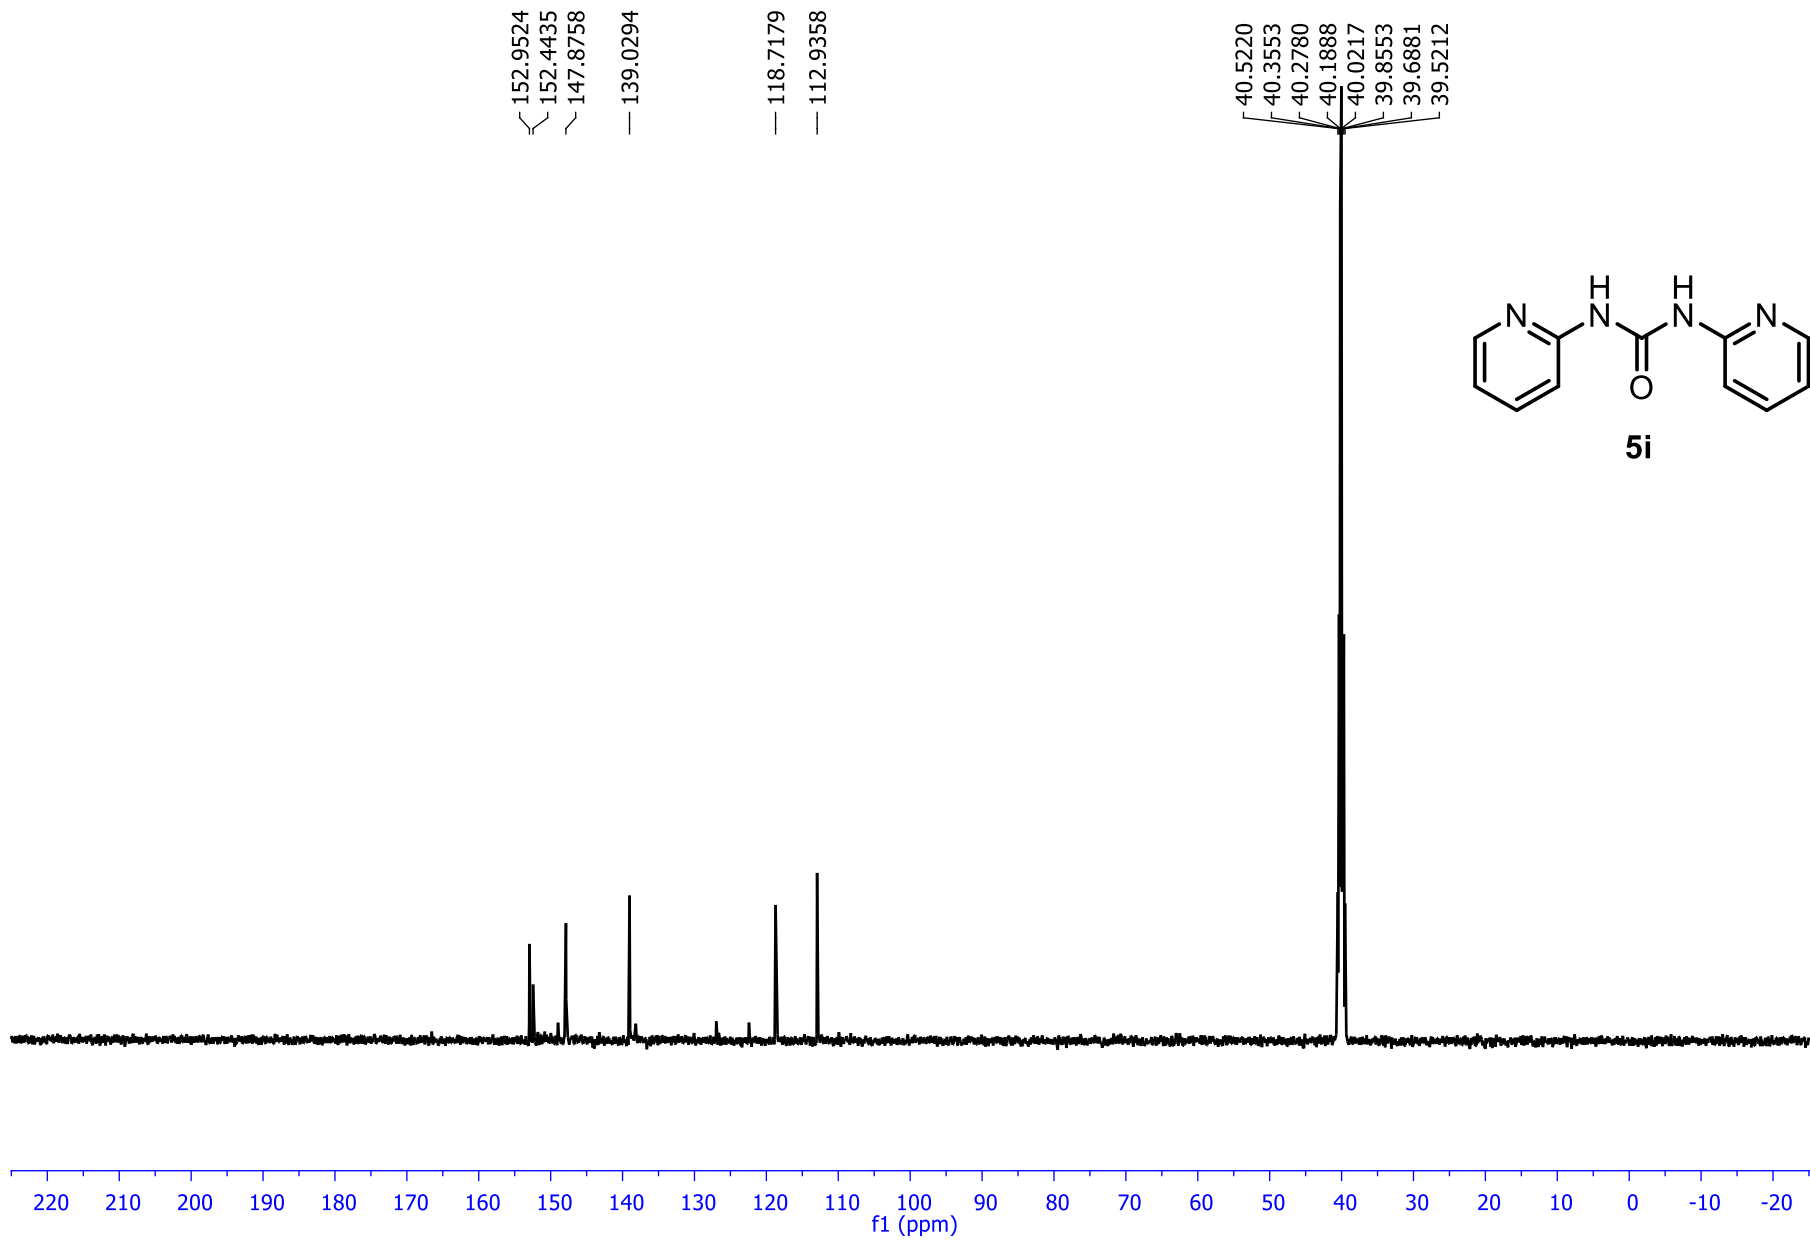

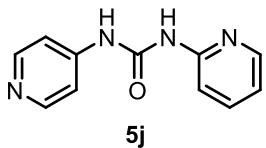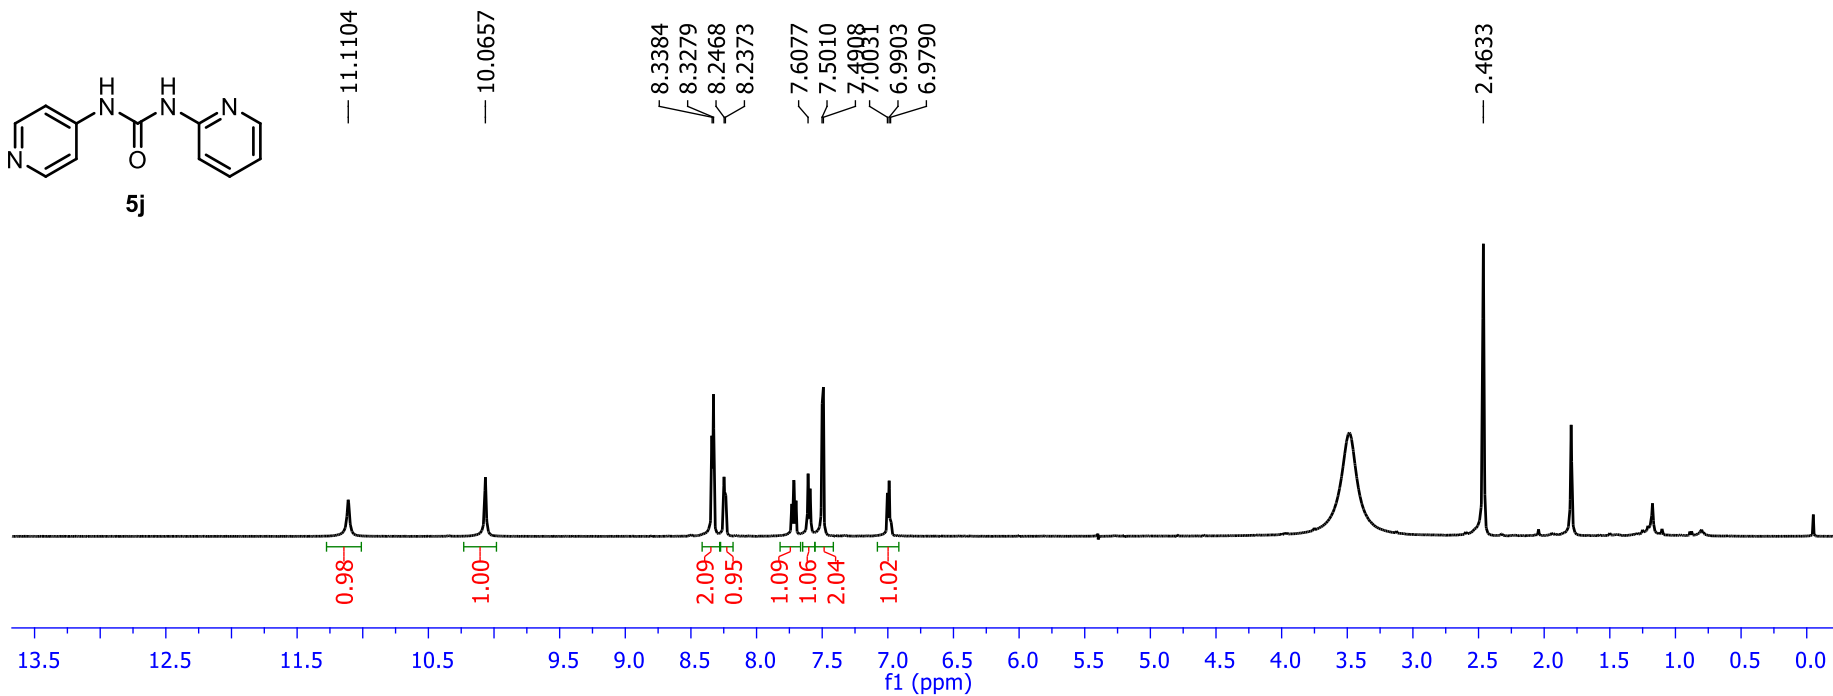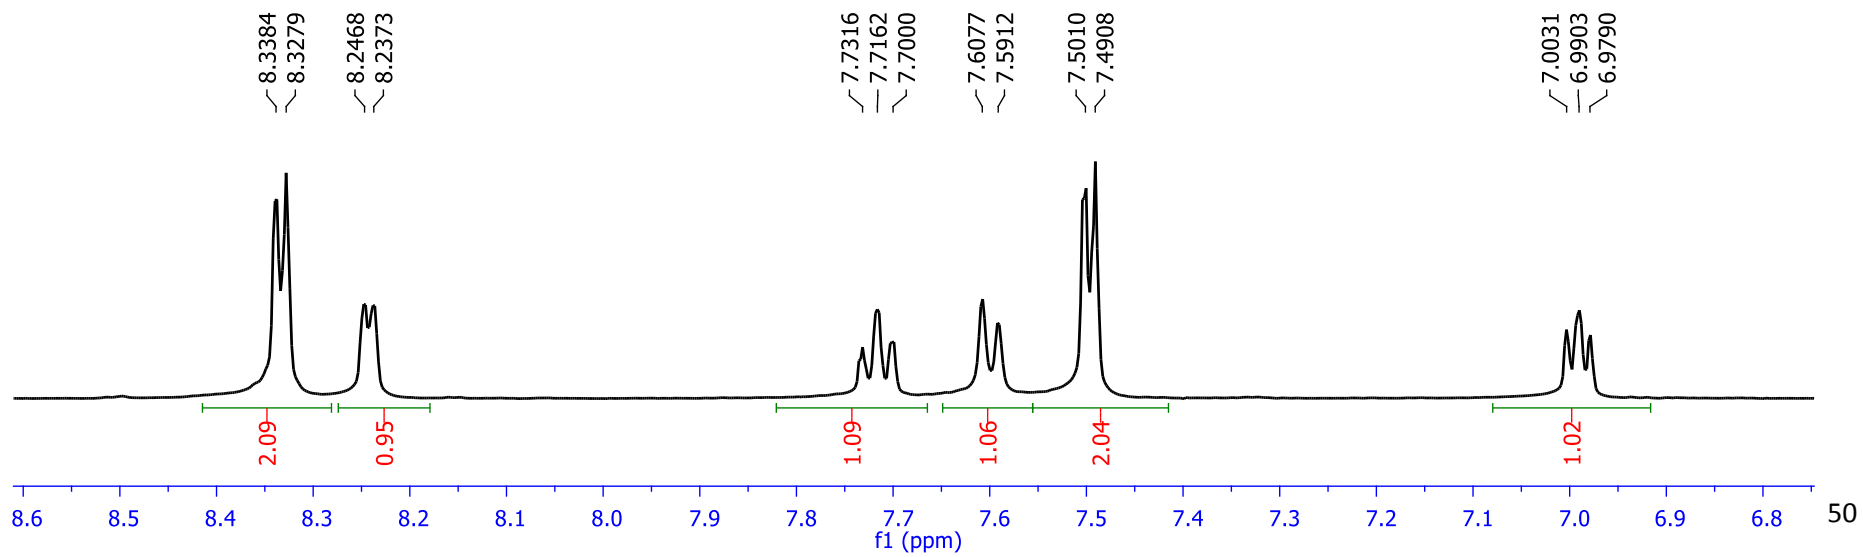

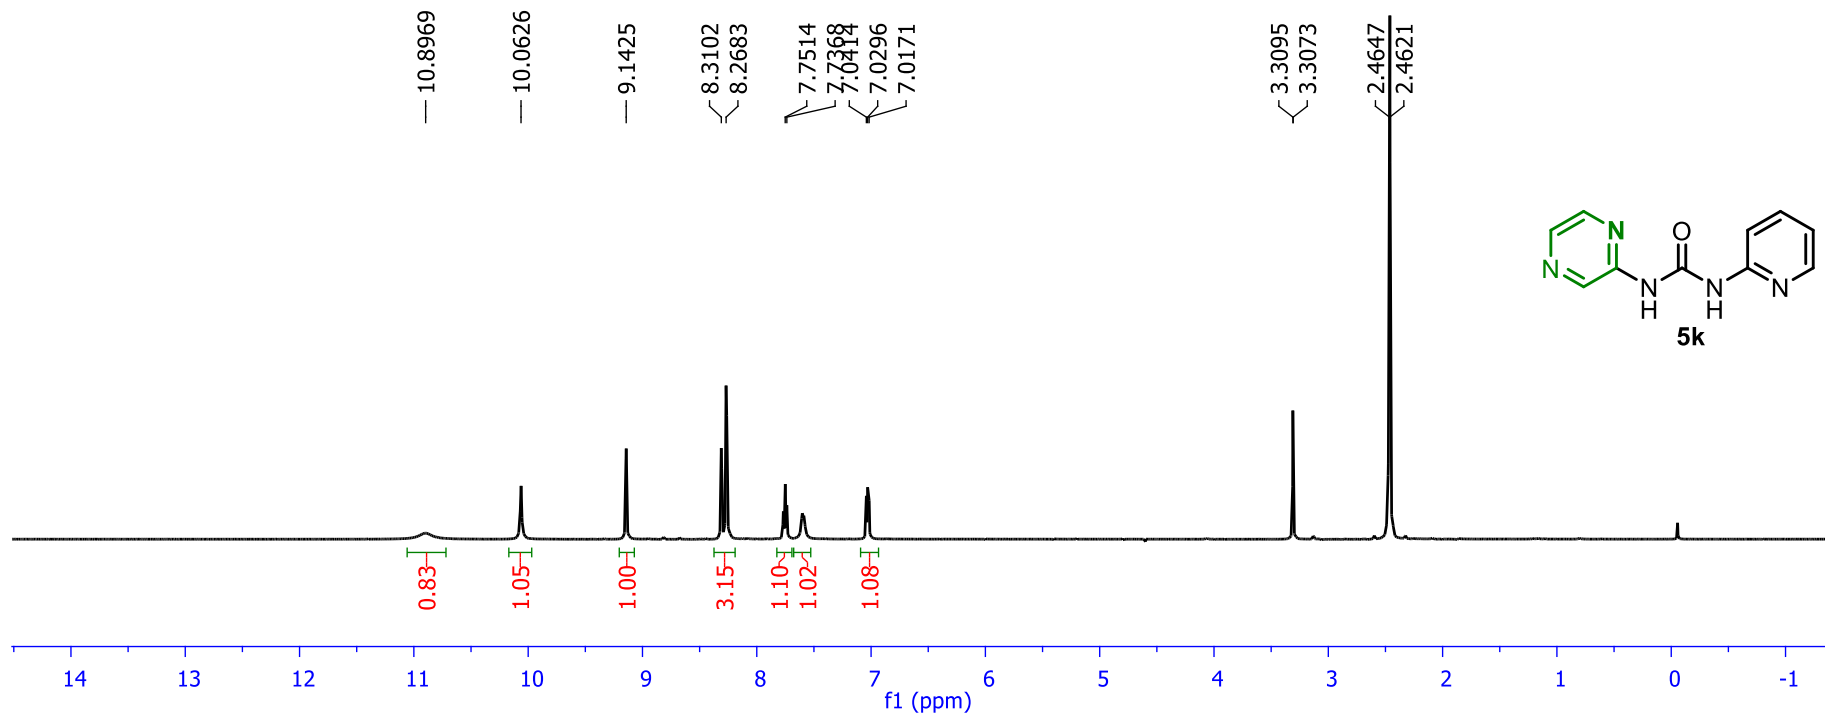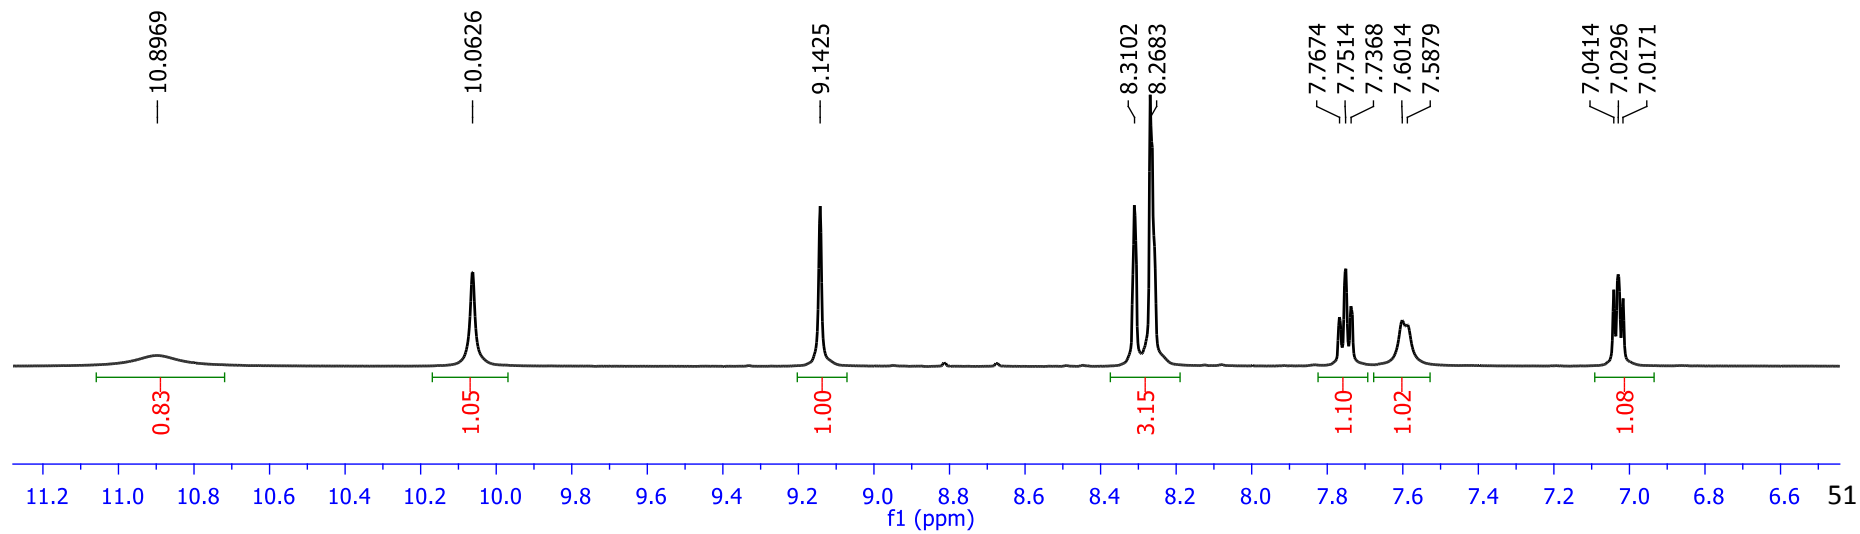

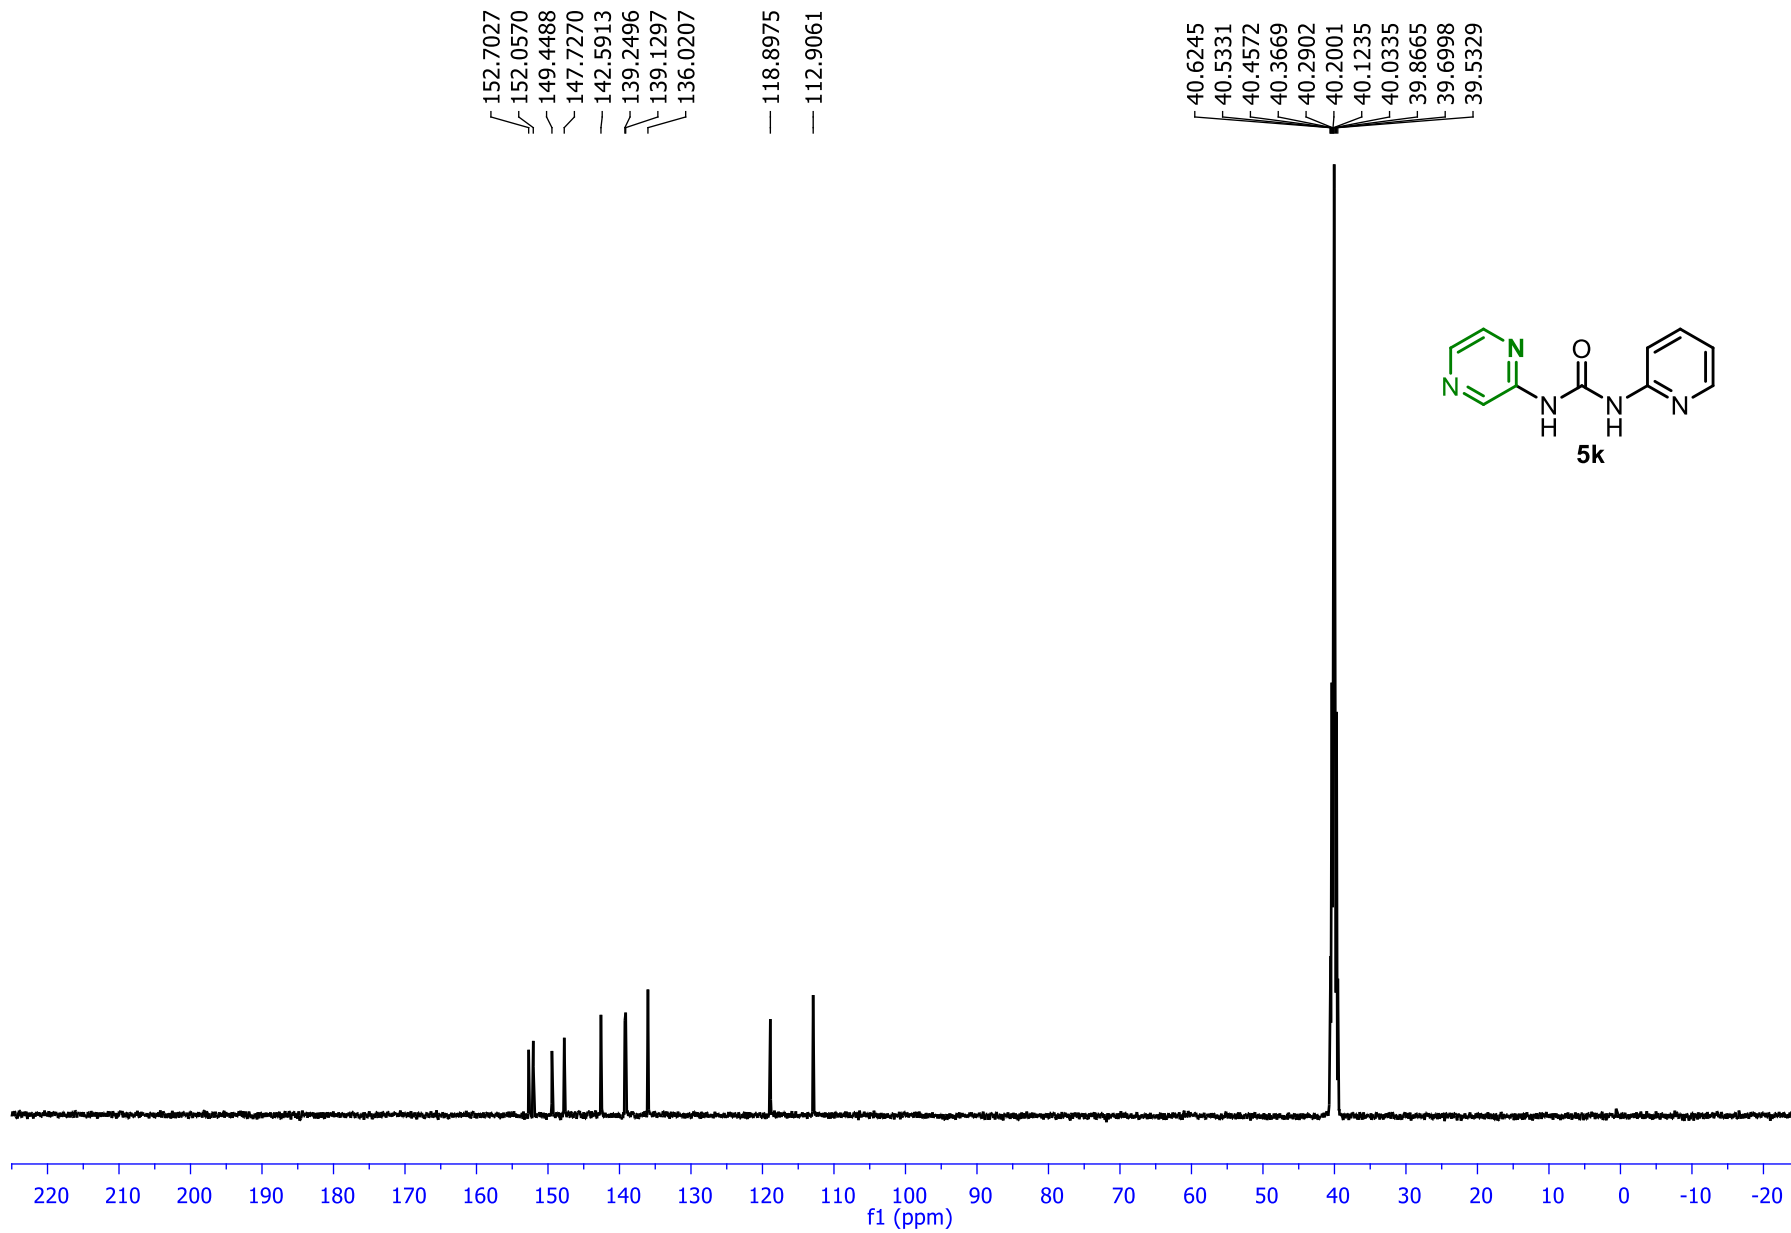

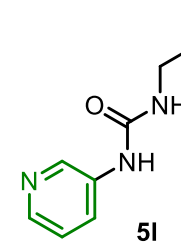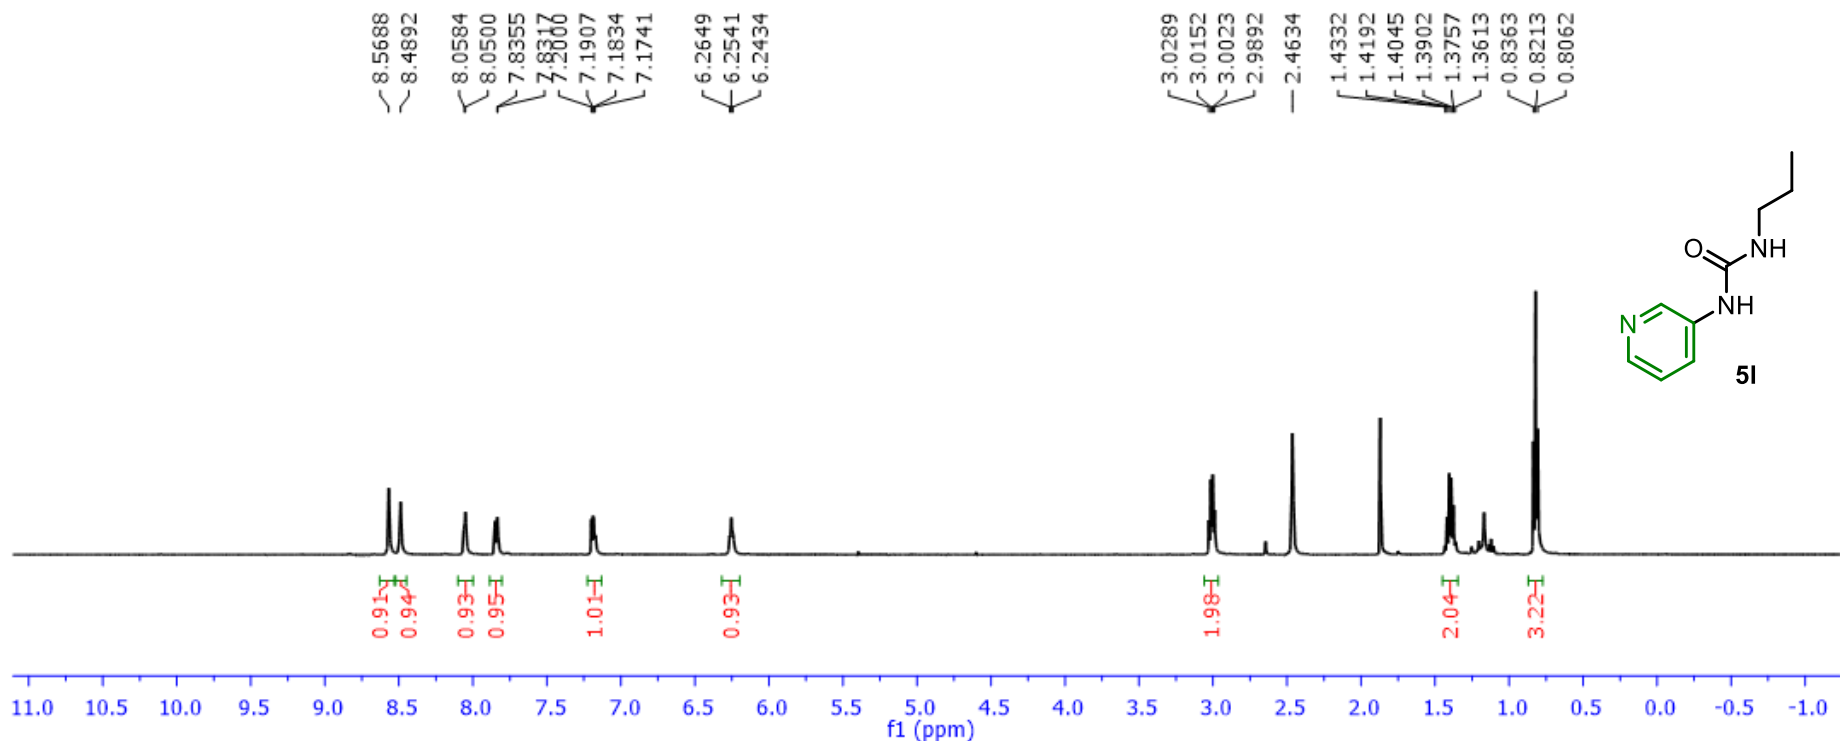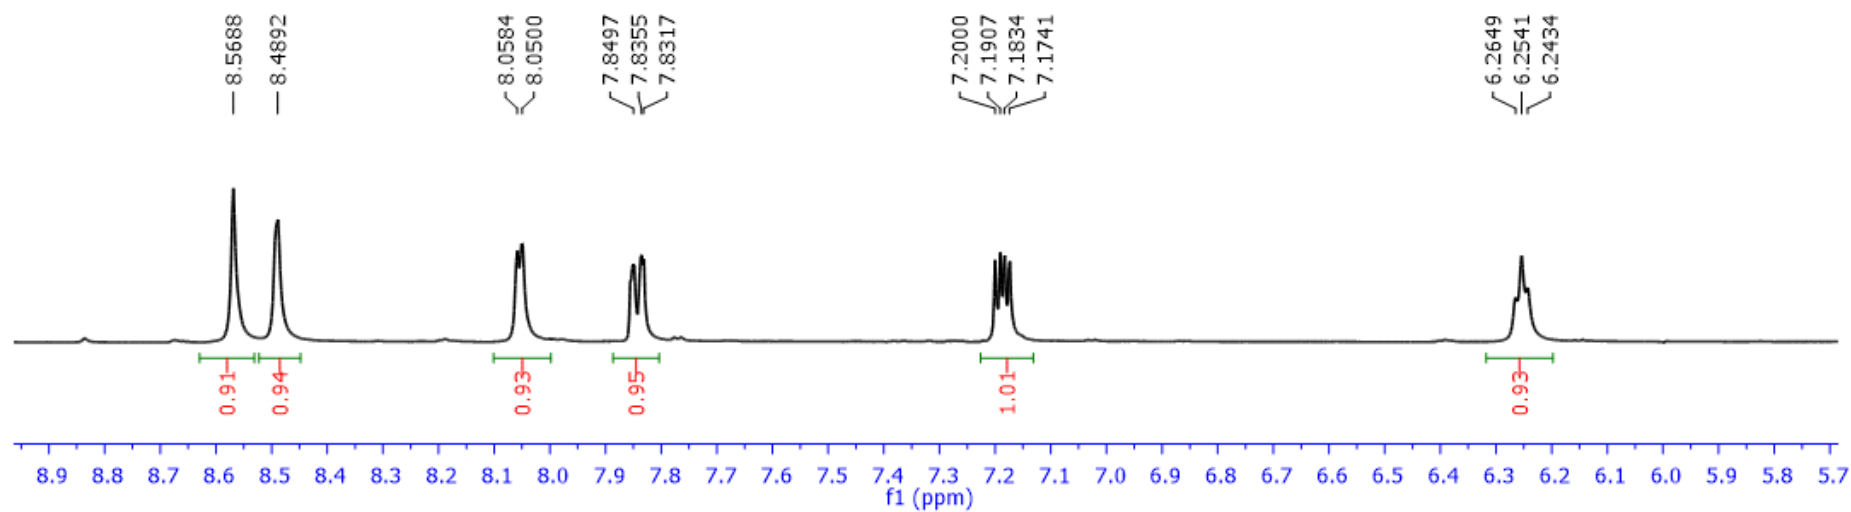

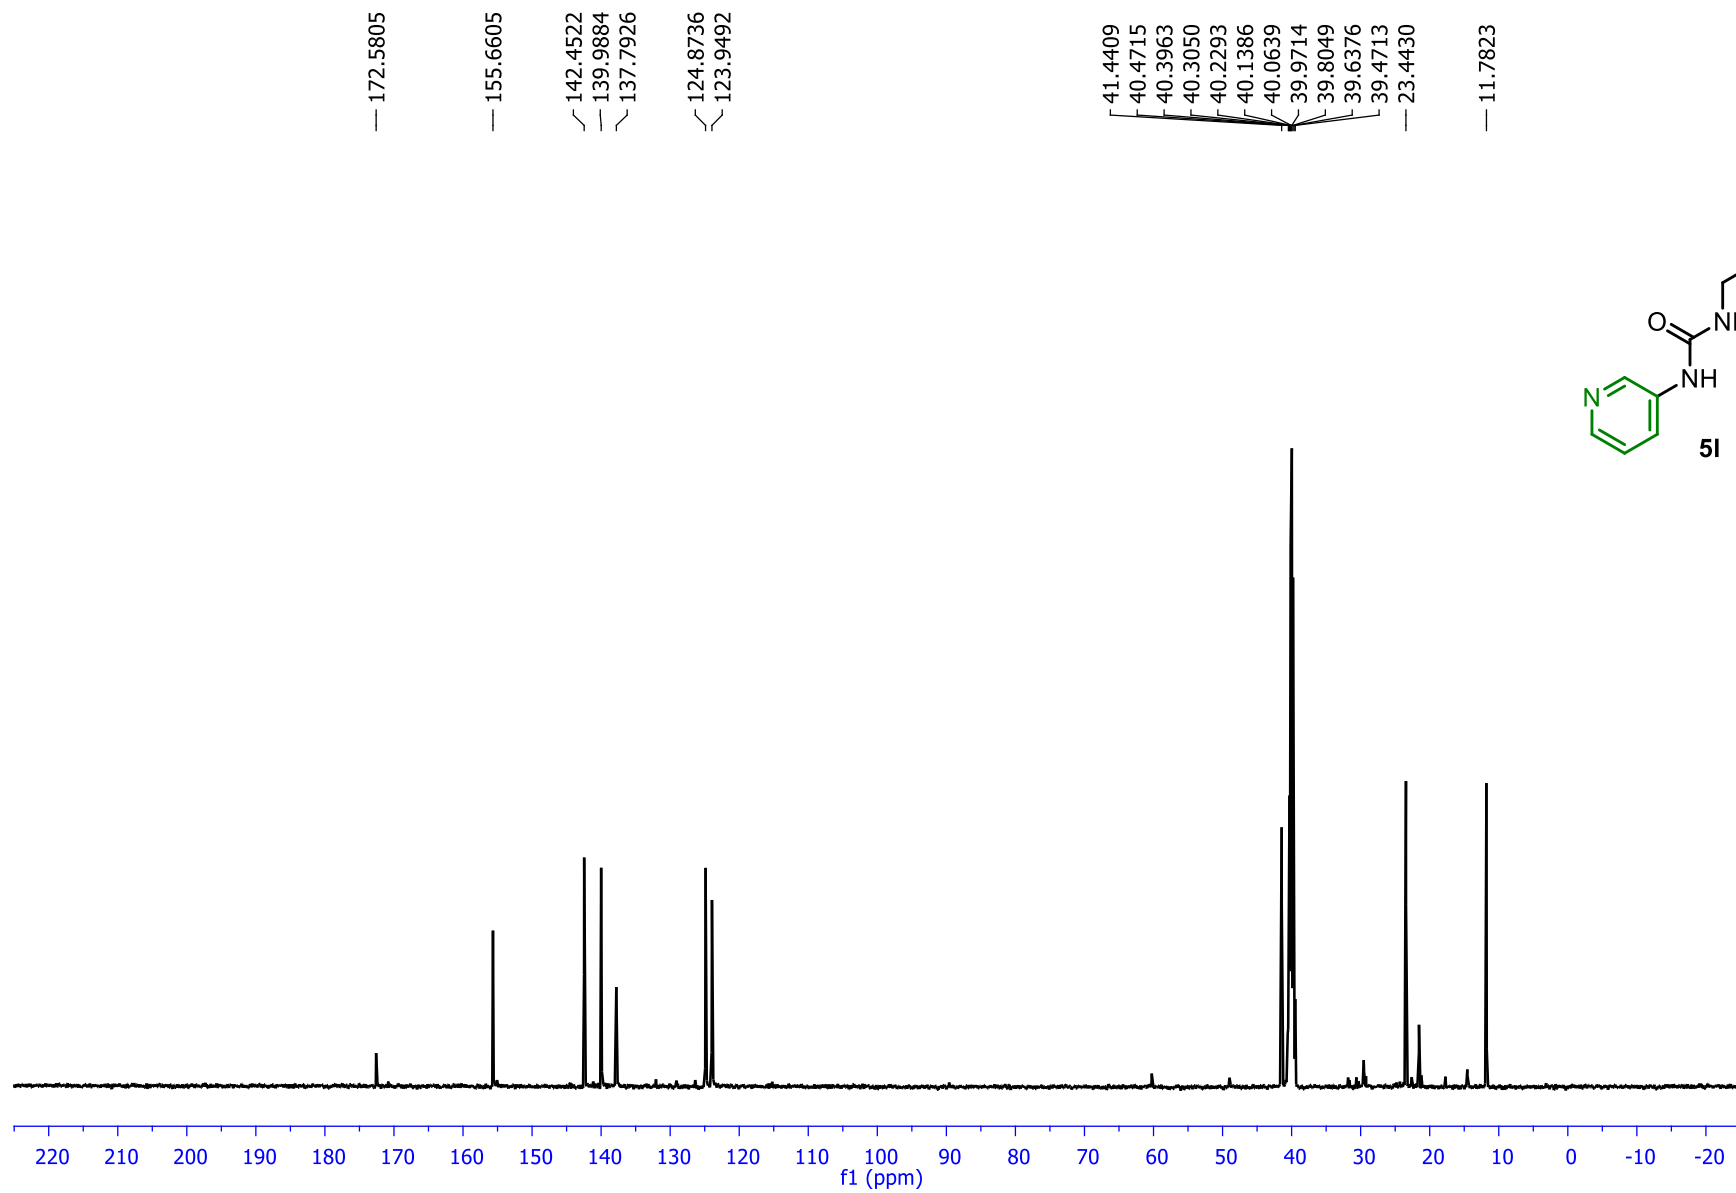

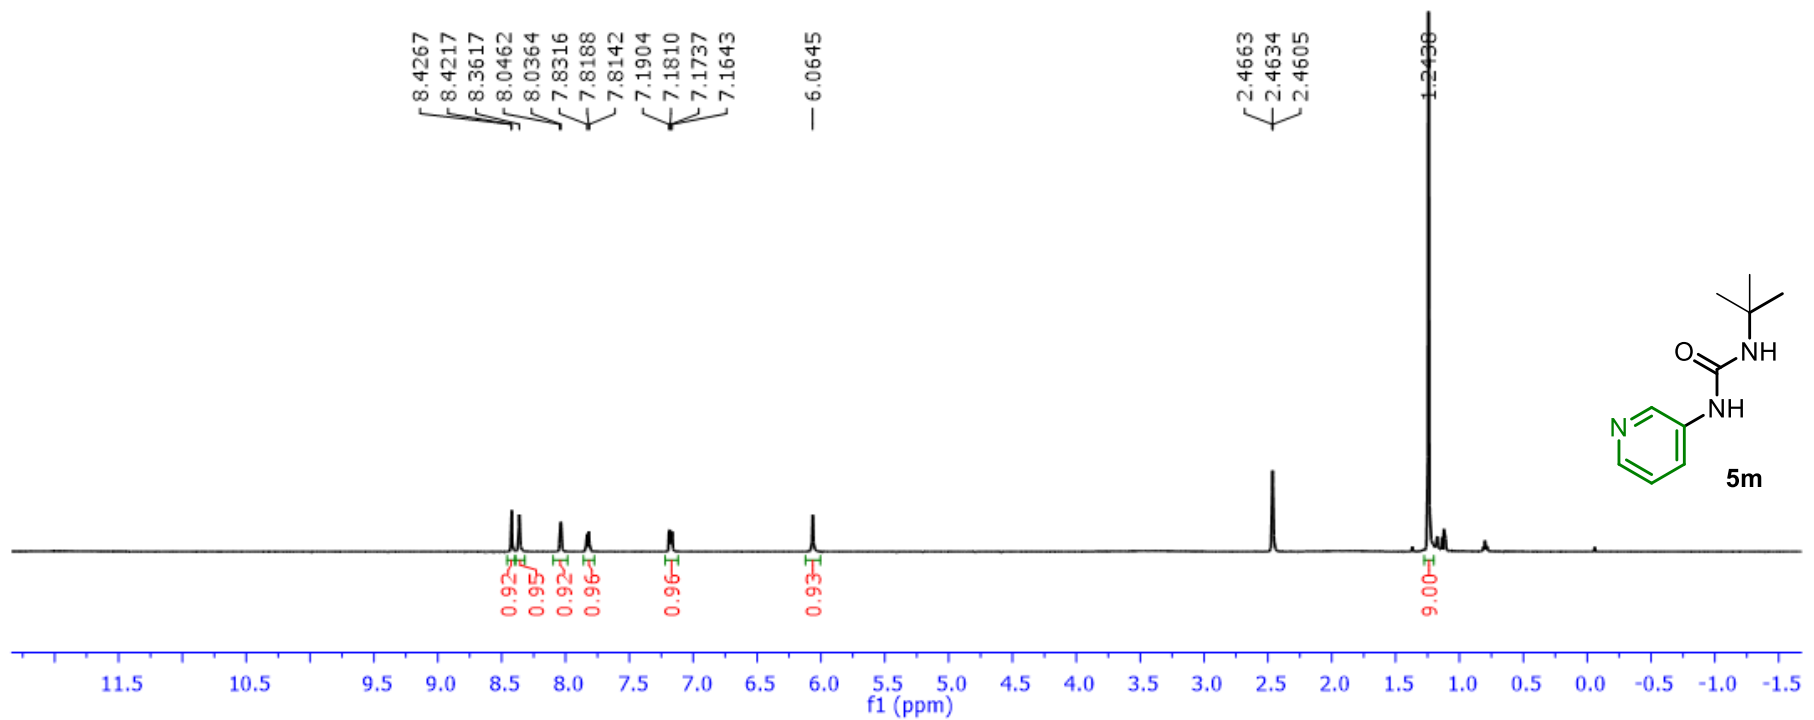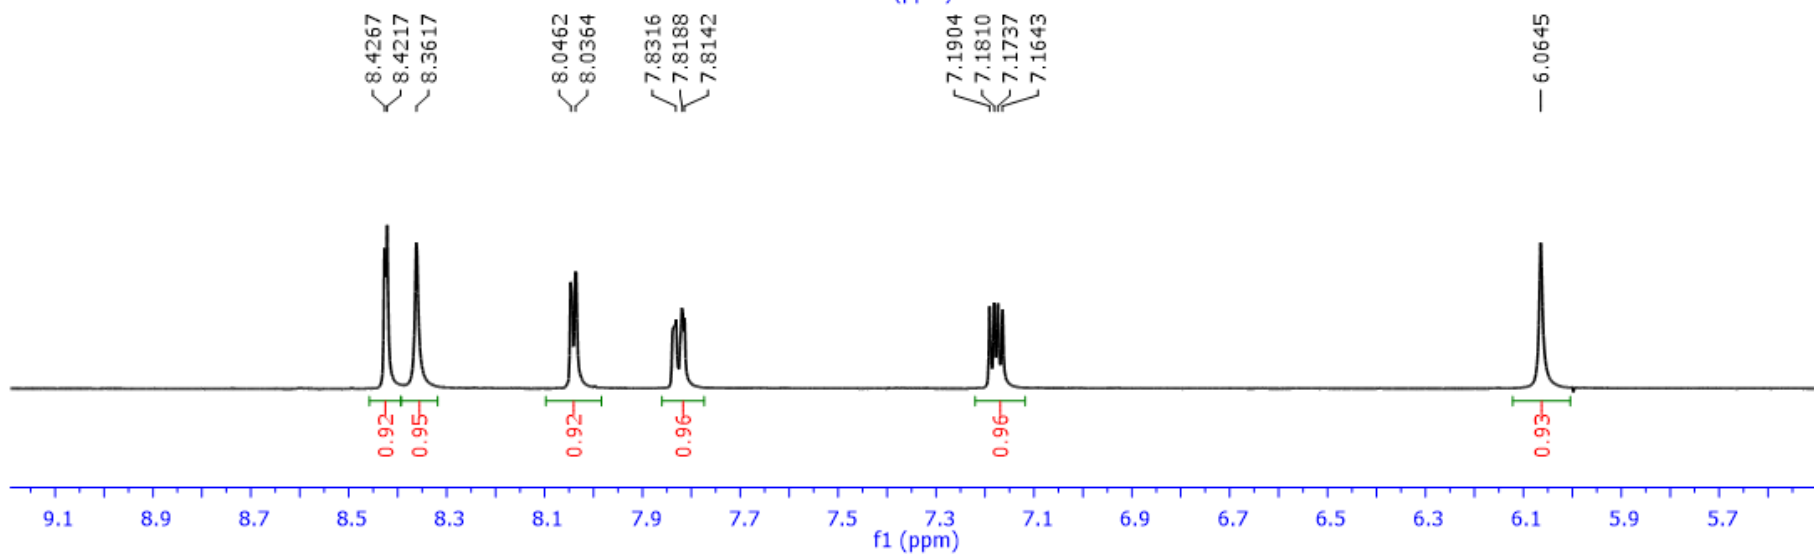

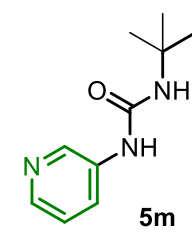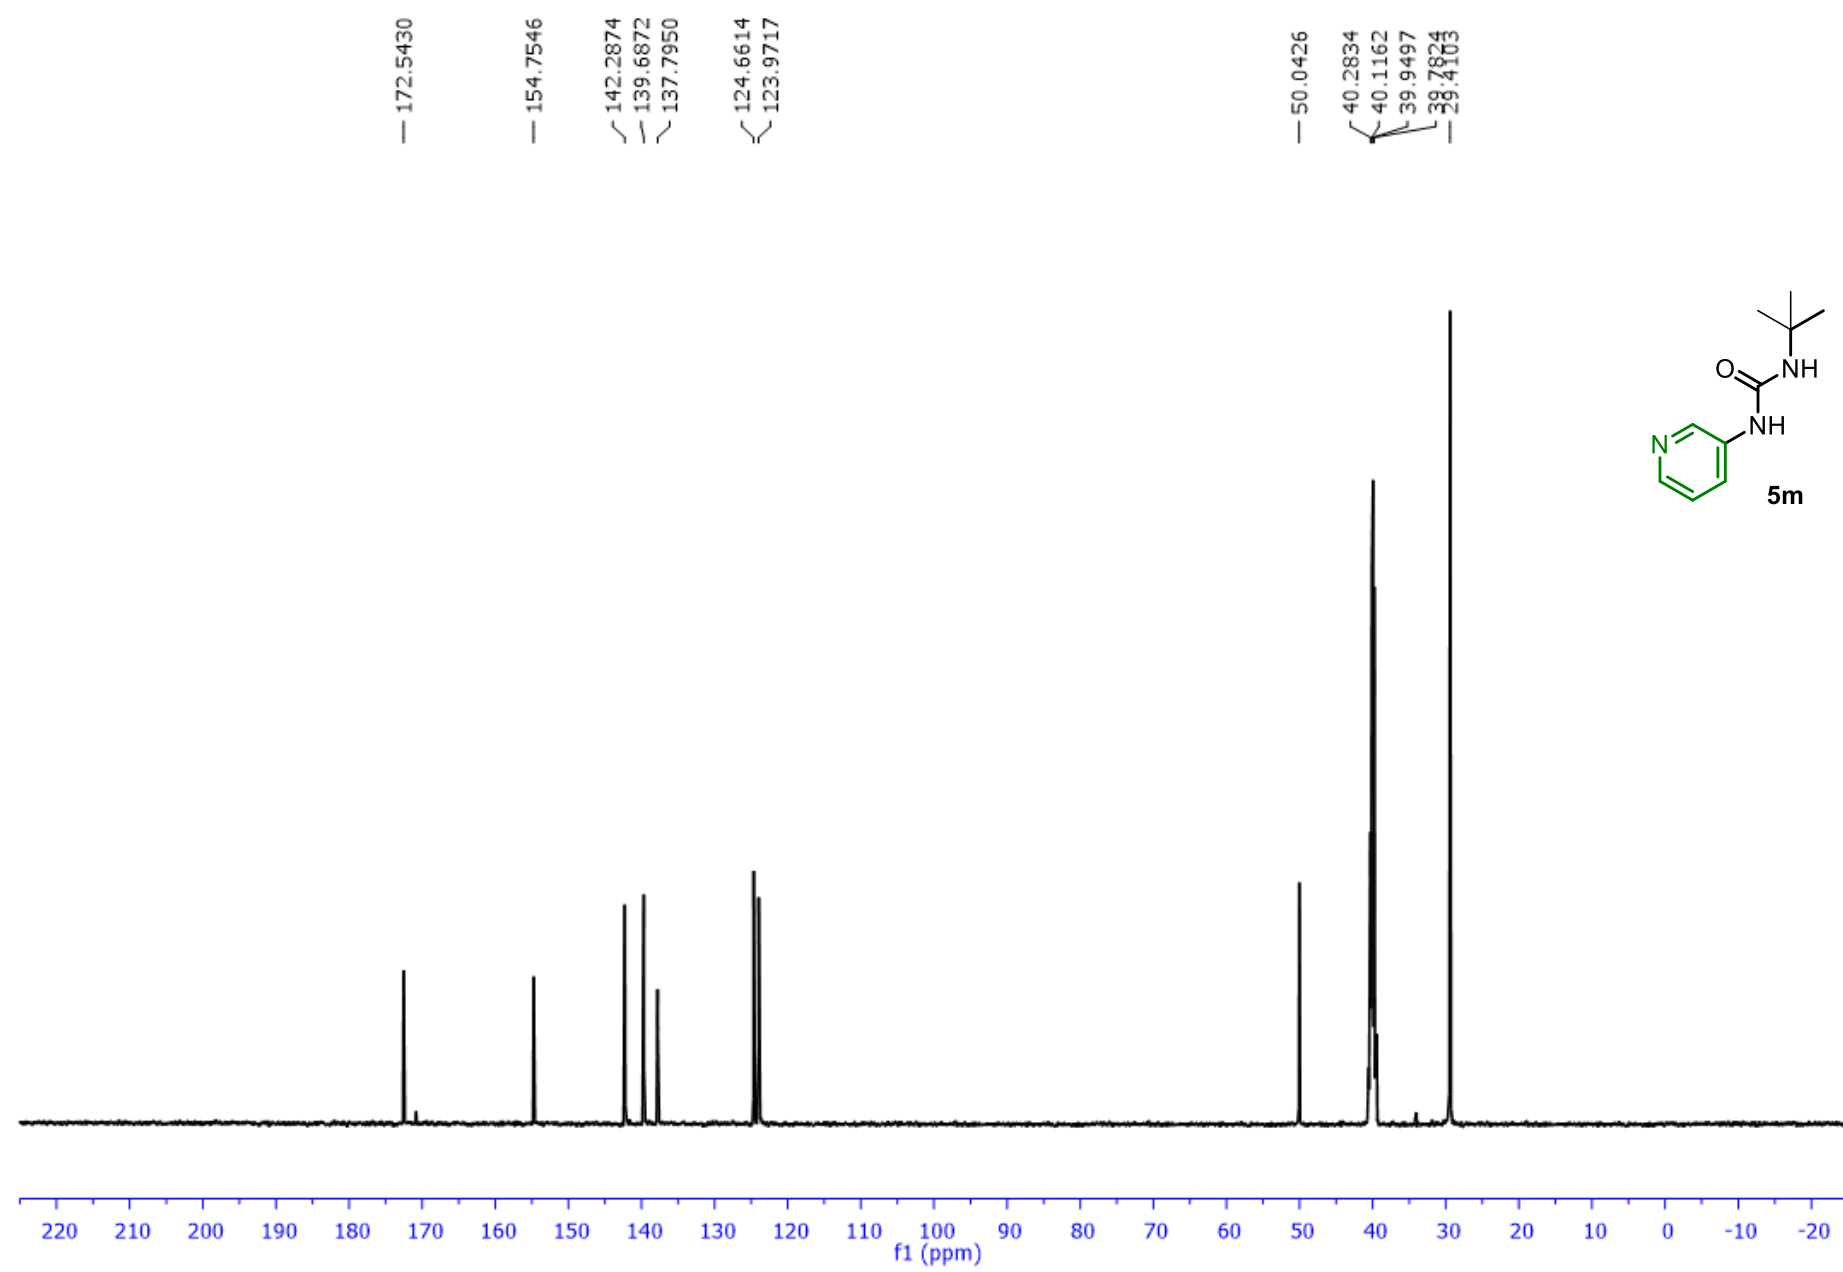



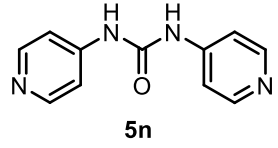

— 11.4723

{ 8.3011  
8.2911

{ 7.4858  
7.4739

3.3149

{ 2.4634  
2.4605

1.71

4.00

4.05

13.5 12.5 11.5 10.5 9.5 9.0 8.5 8.0 7.5 7.0 6.5 6.0 5.5 5.0 4.5 4.0 3.5 3.0 2.5 2.0 1.5 1.0 0.5 0.0 -0.5

f1 (ppm)

{ 8.3011  
8.2911

{ 7.4858  
7.4739

4.00

4.05

8.6 8.5 8.4 8.3 8.2 8.1 8.0 7.9 7.8 7.7 7.6 7.5 7.4 7.3 7.2 7.1 57

f1 (ppm)

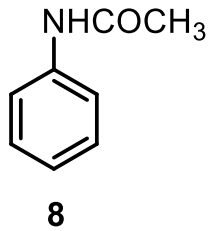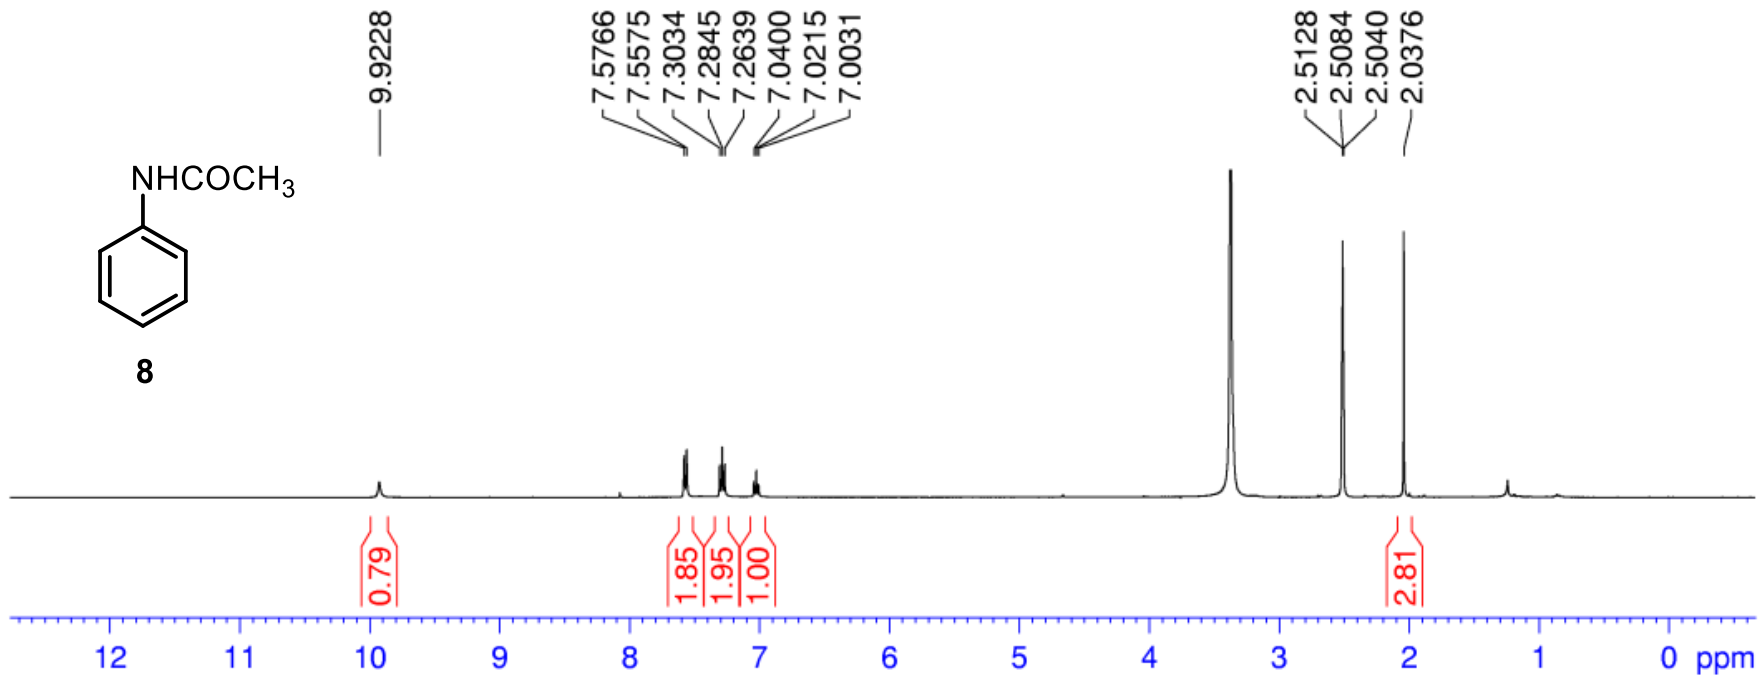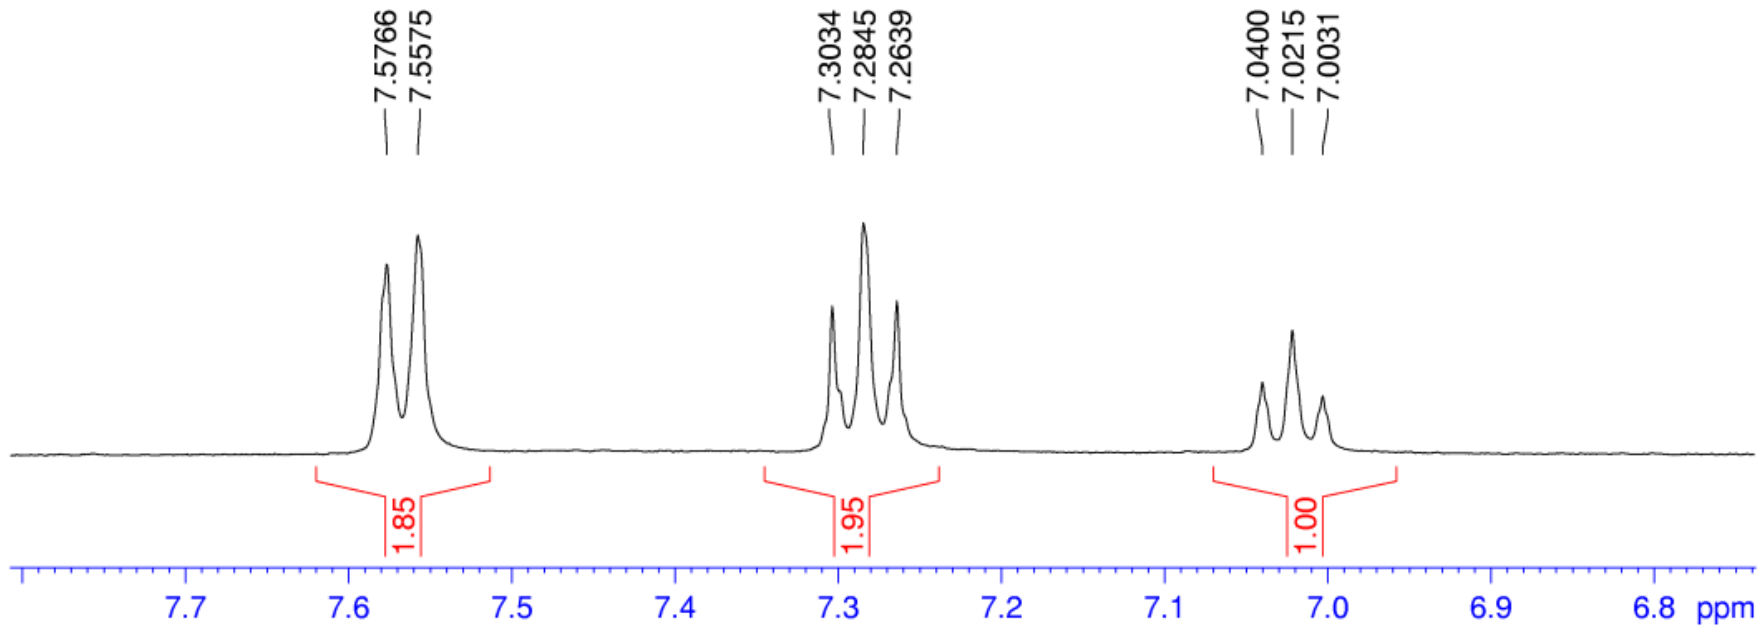

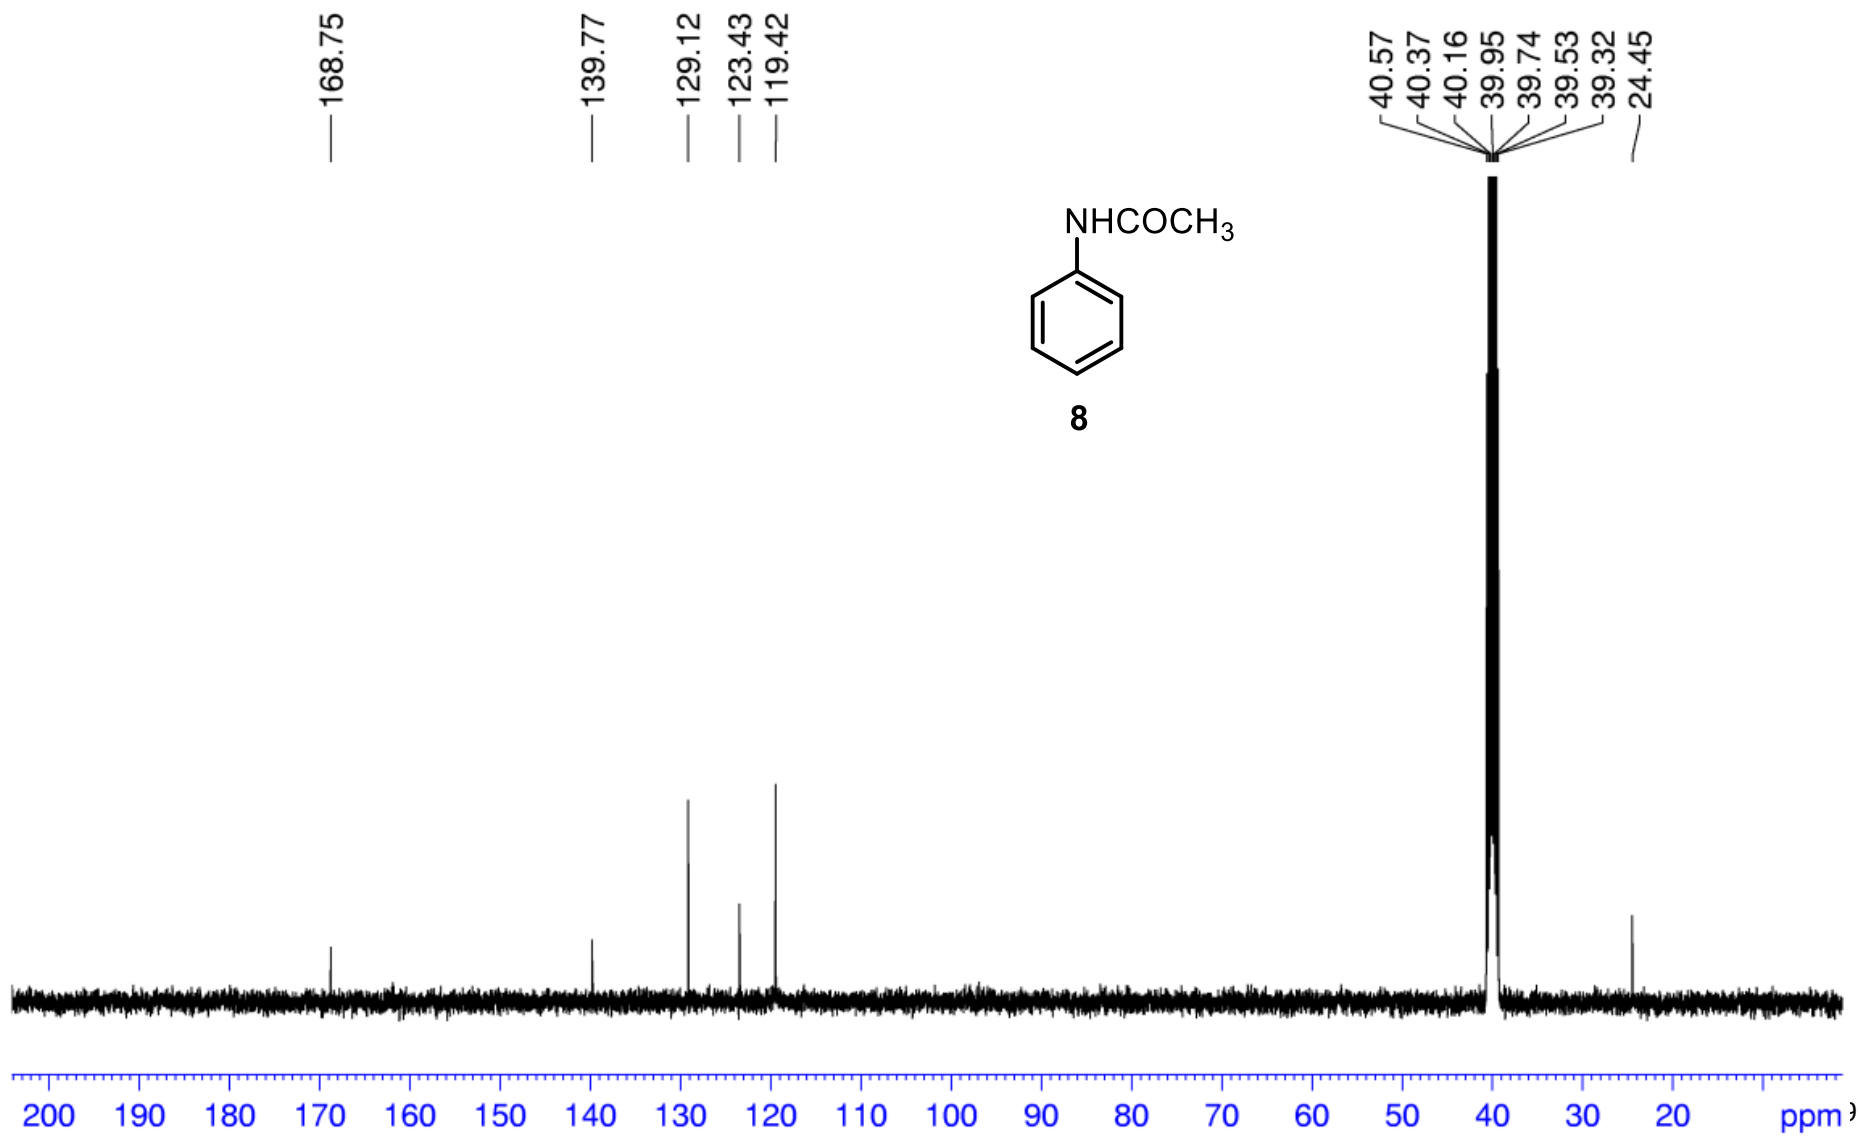

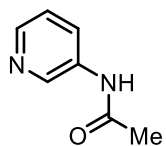

9b

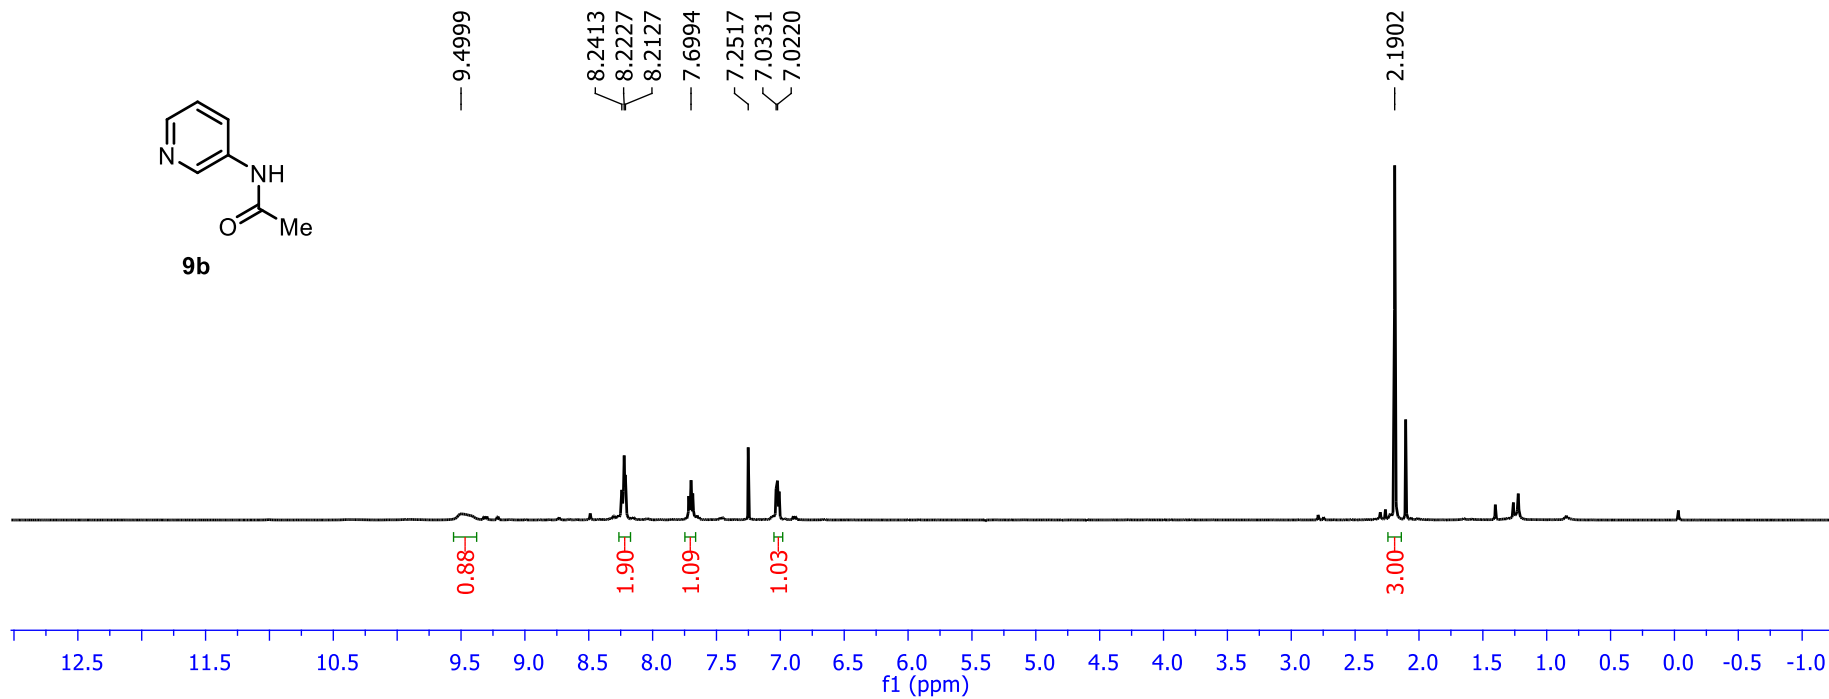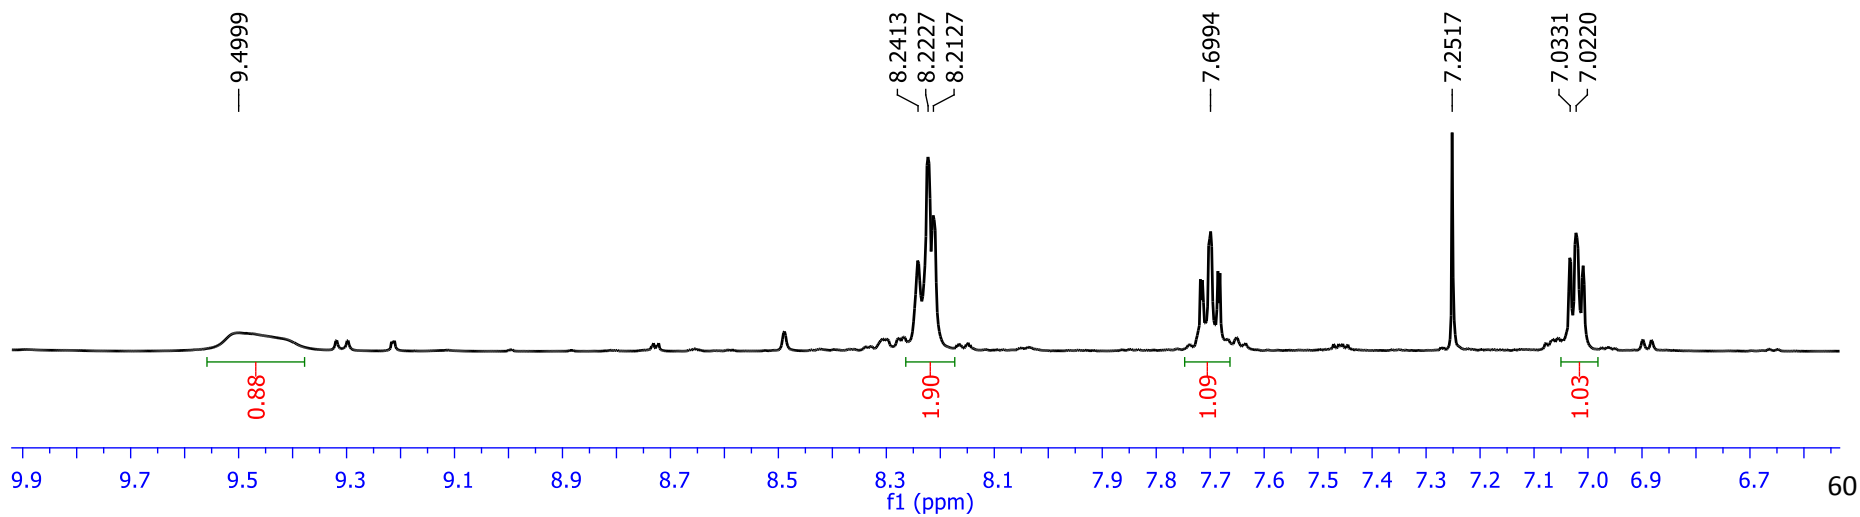

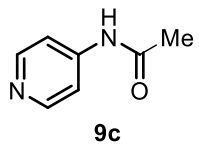

8.4749  
8.4634  
— 8.0231  
7.5123  
7.5013  
7.2518

— 2.2110

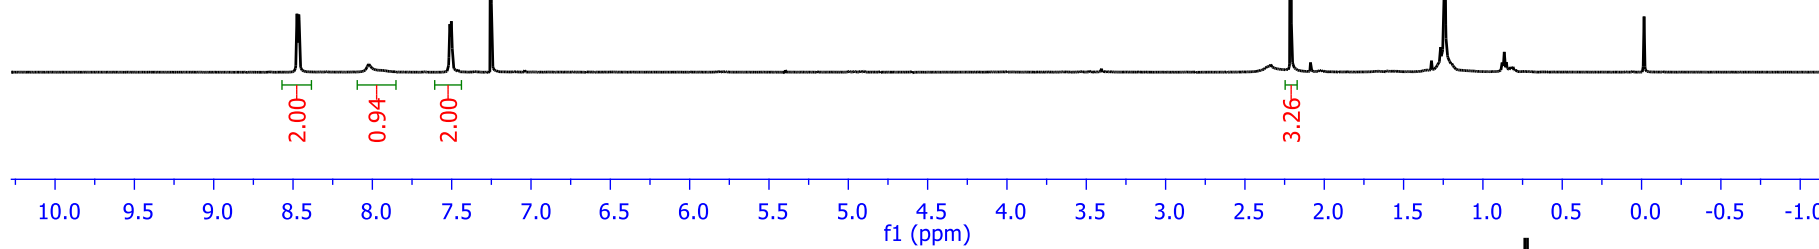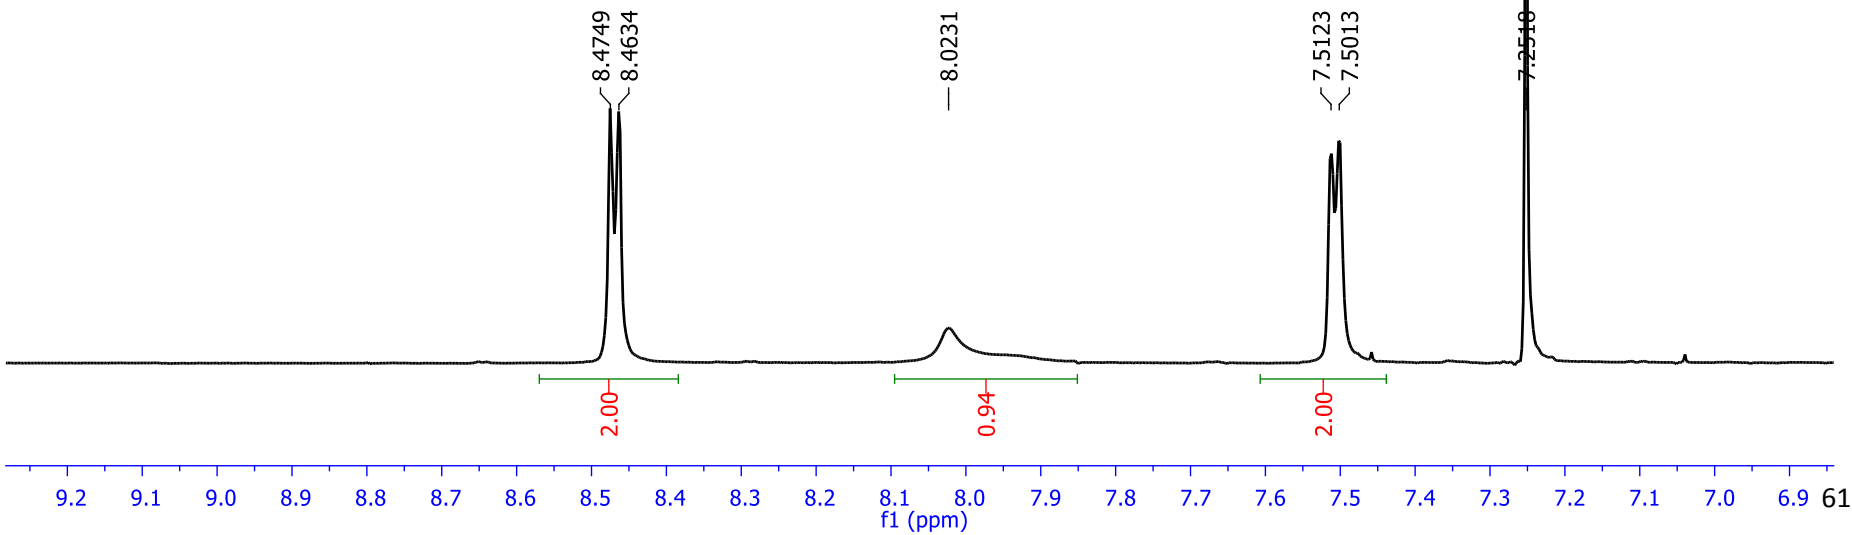

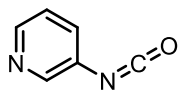

10

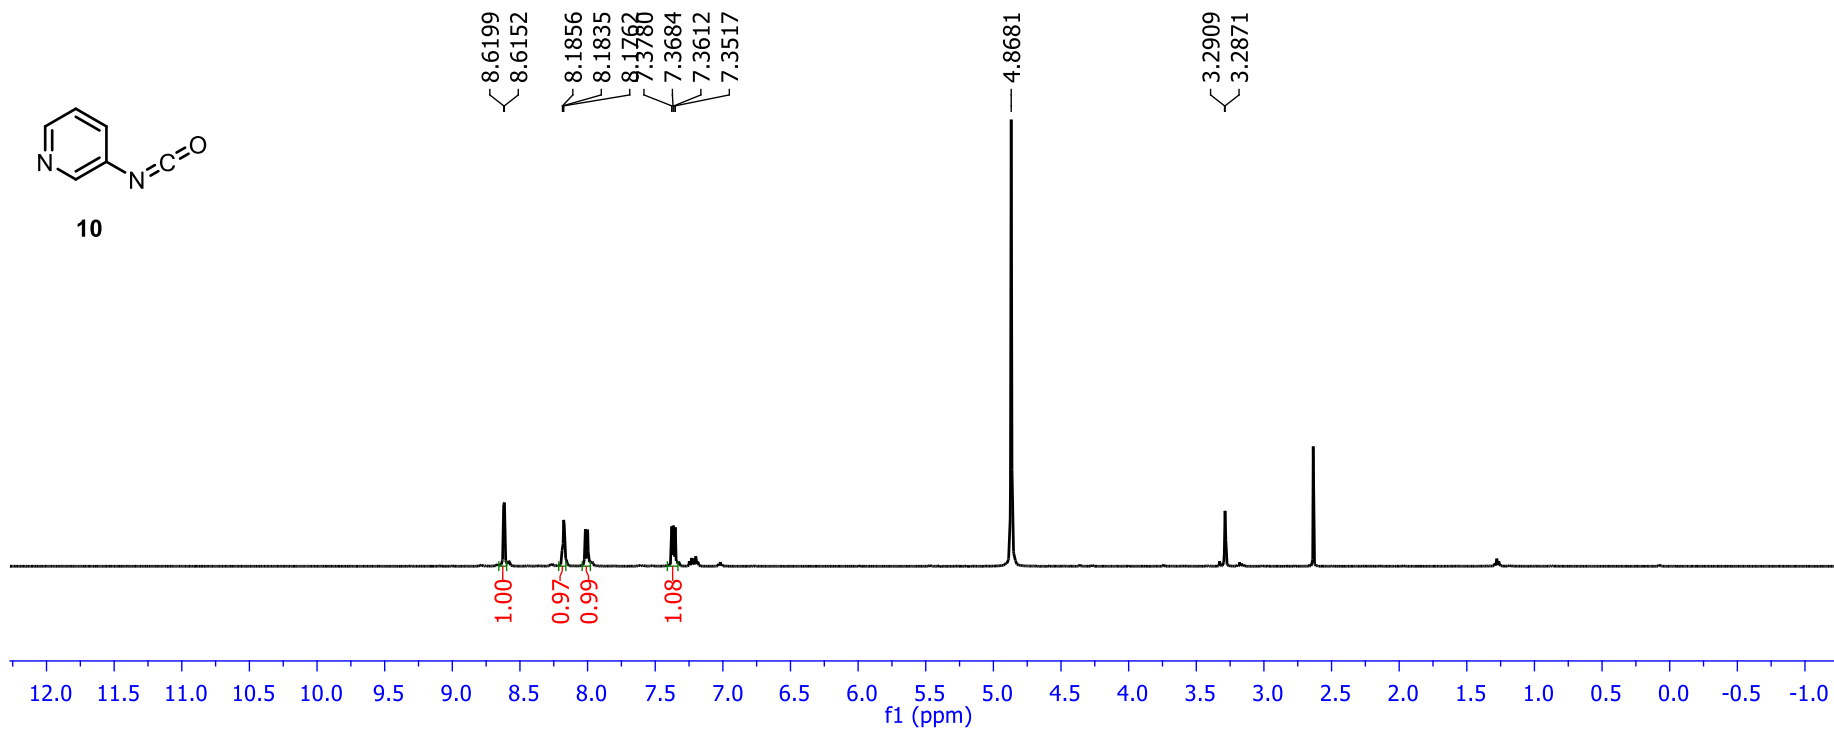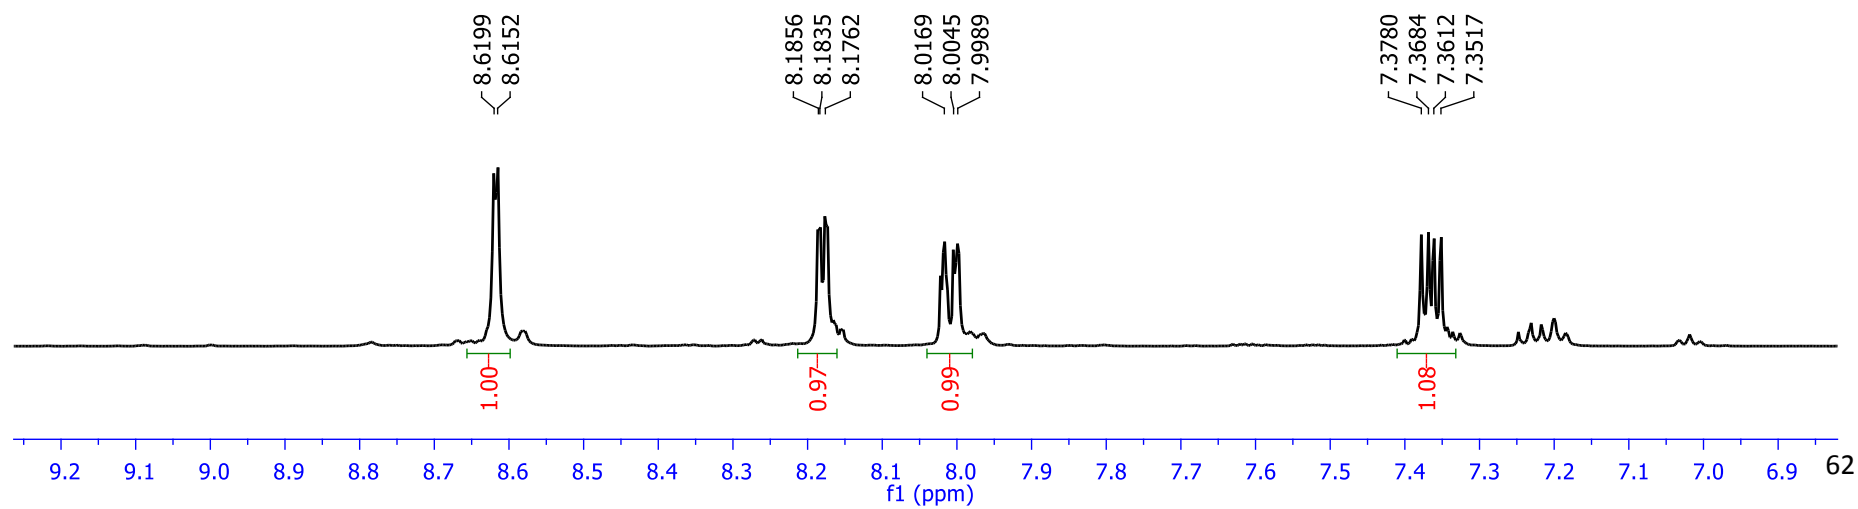

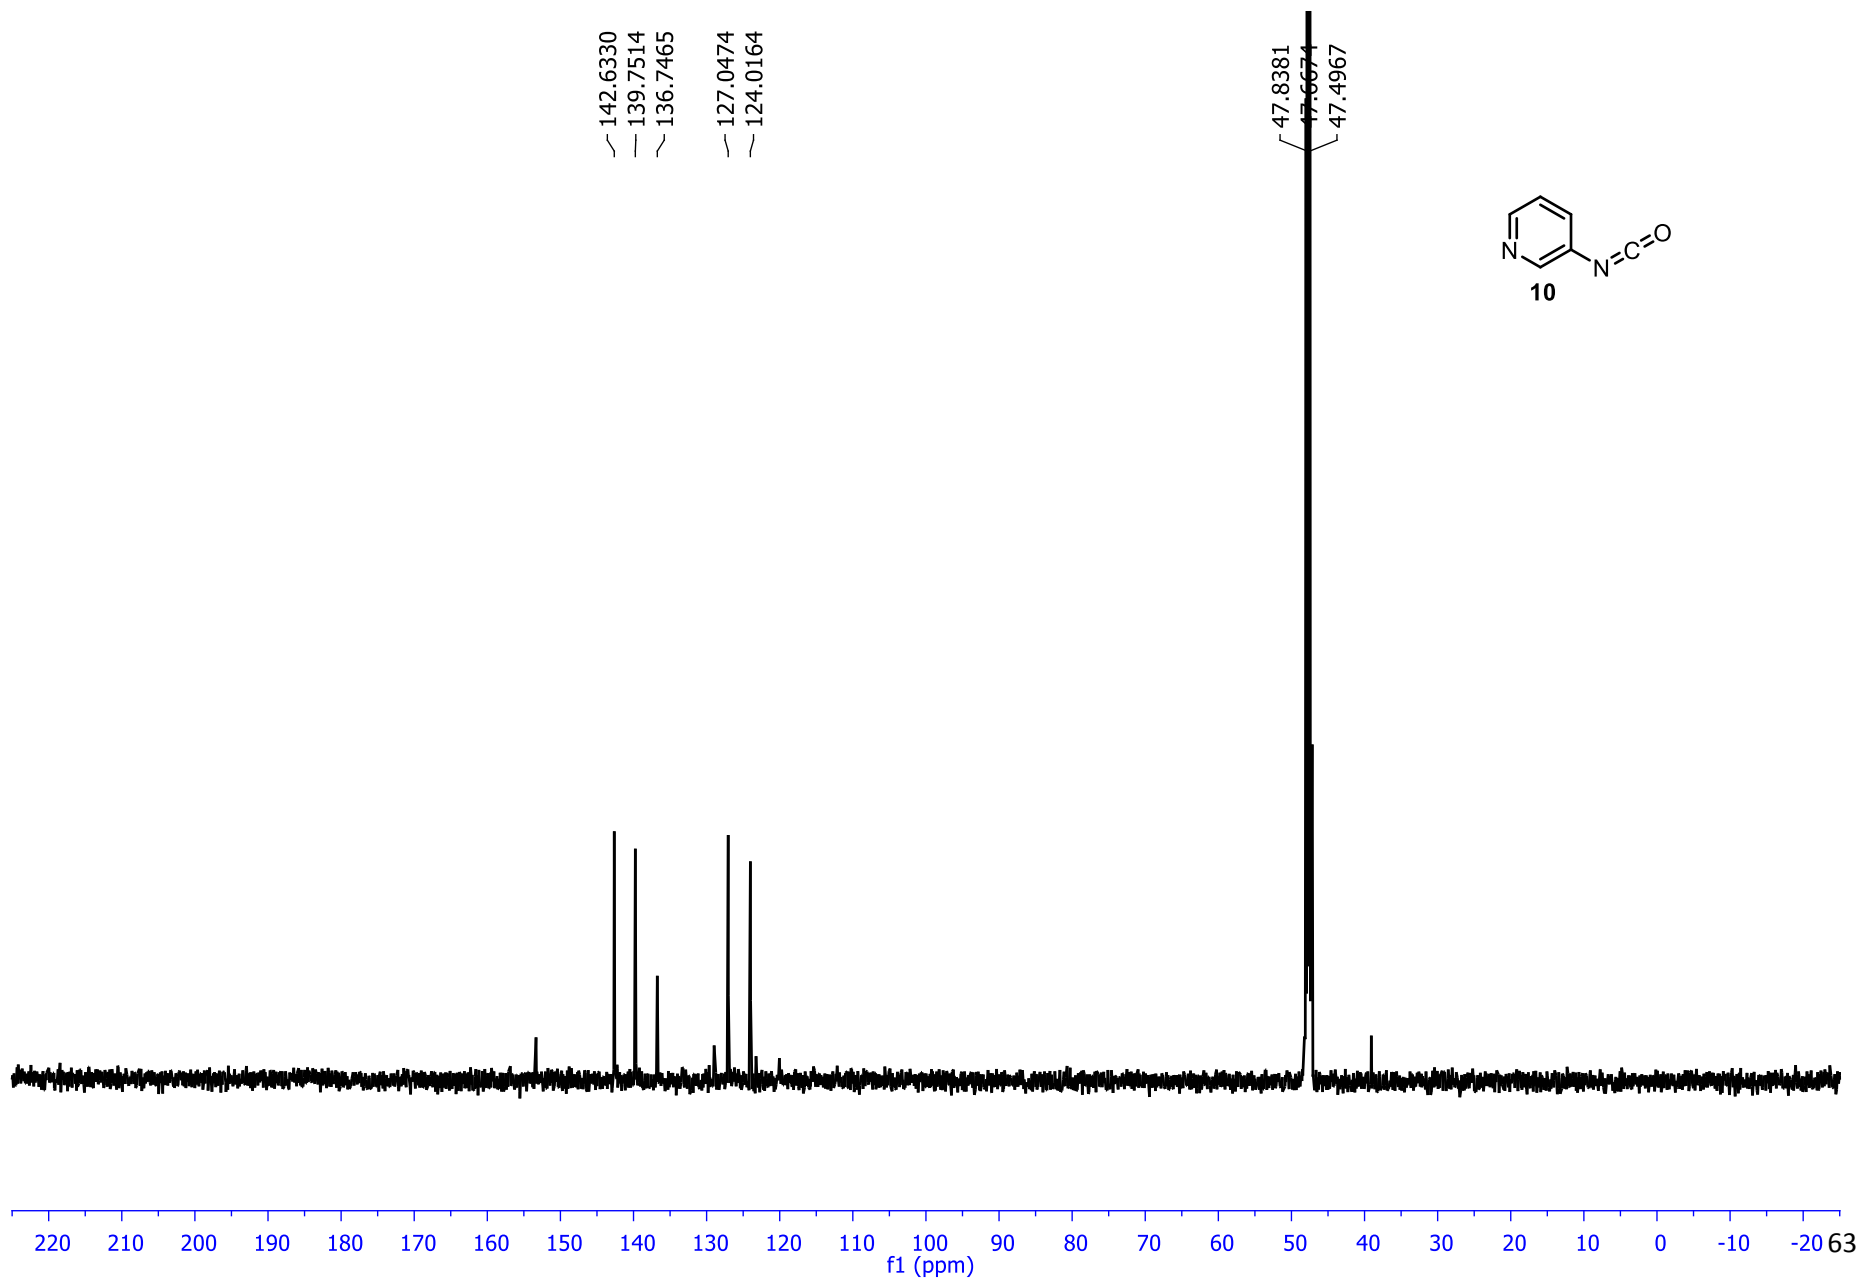

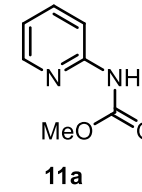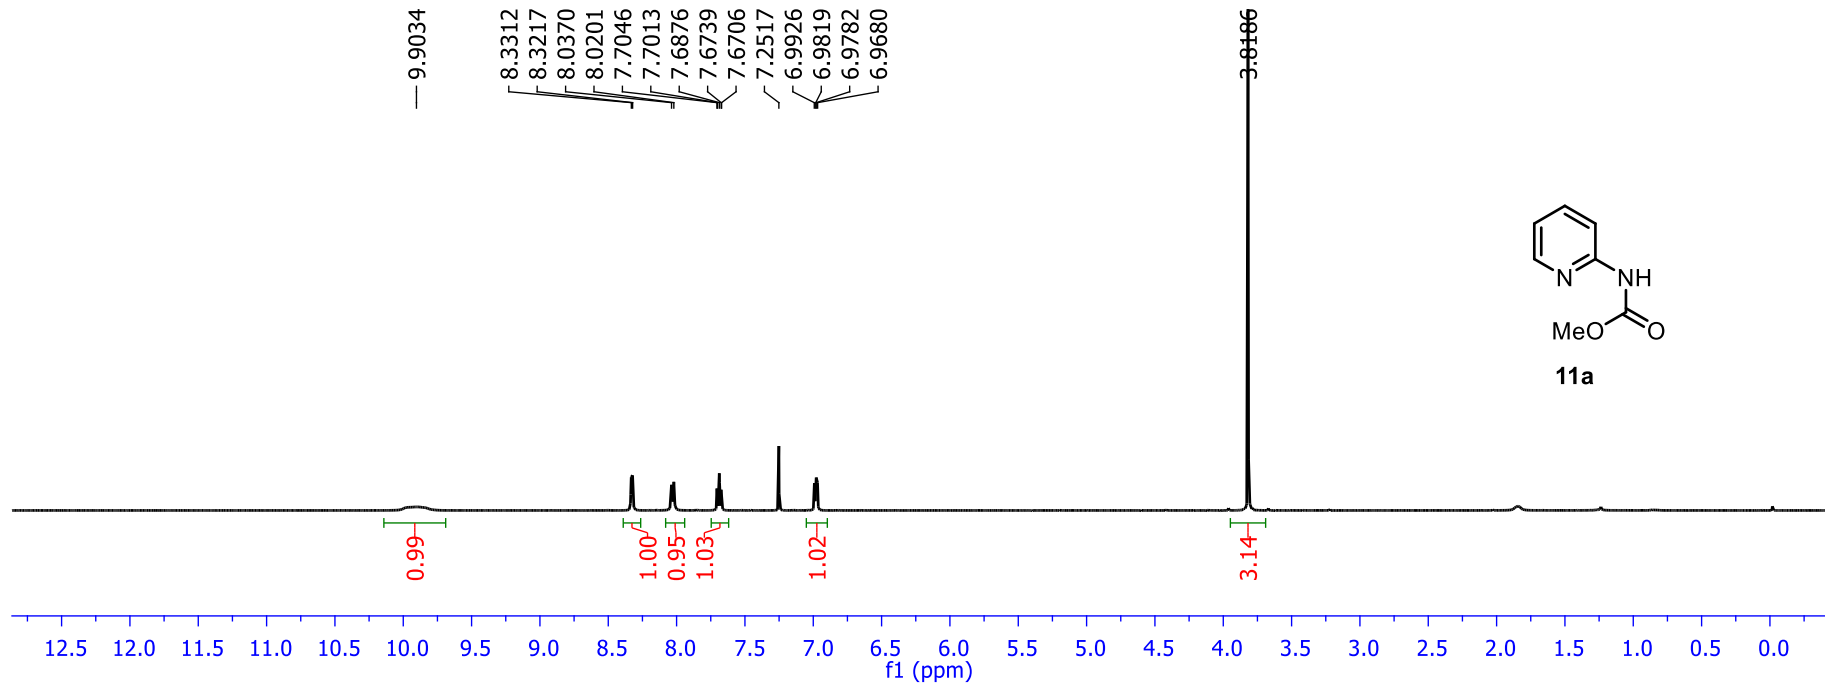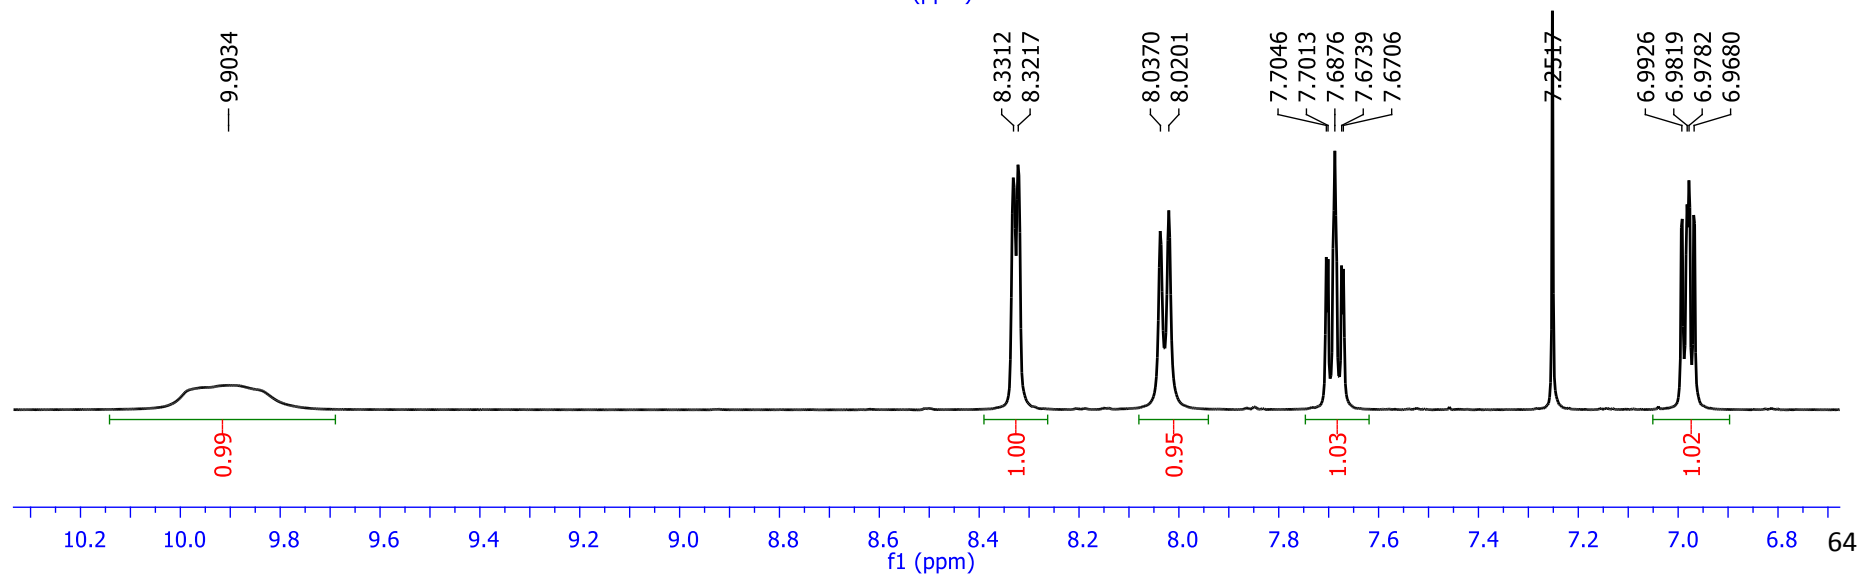



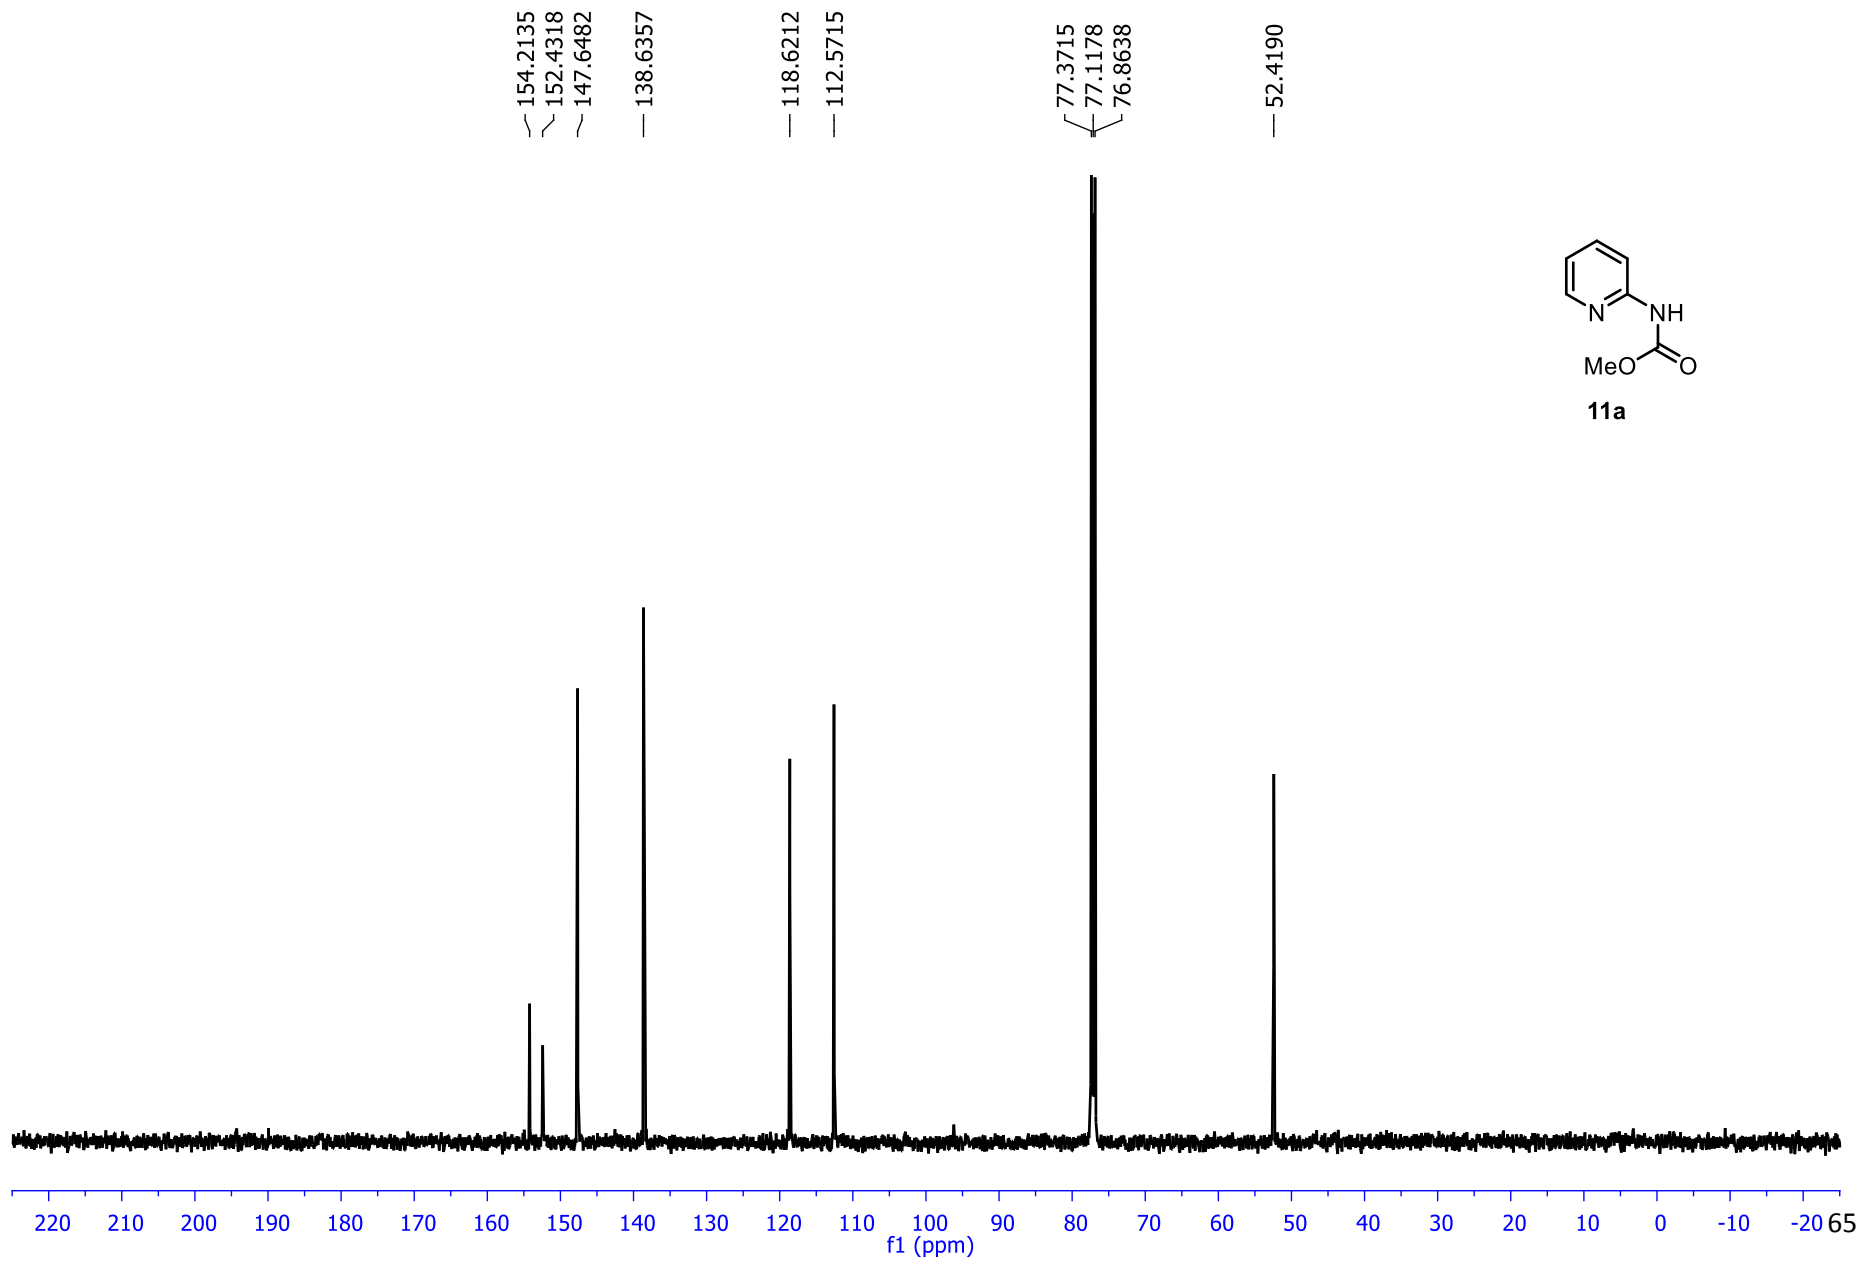

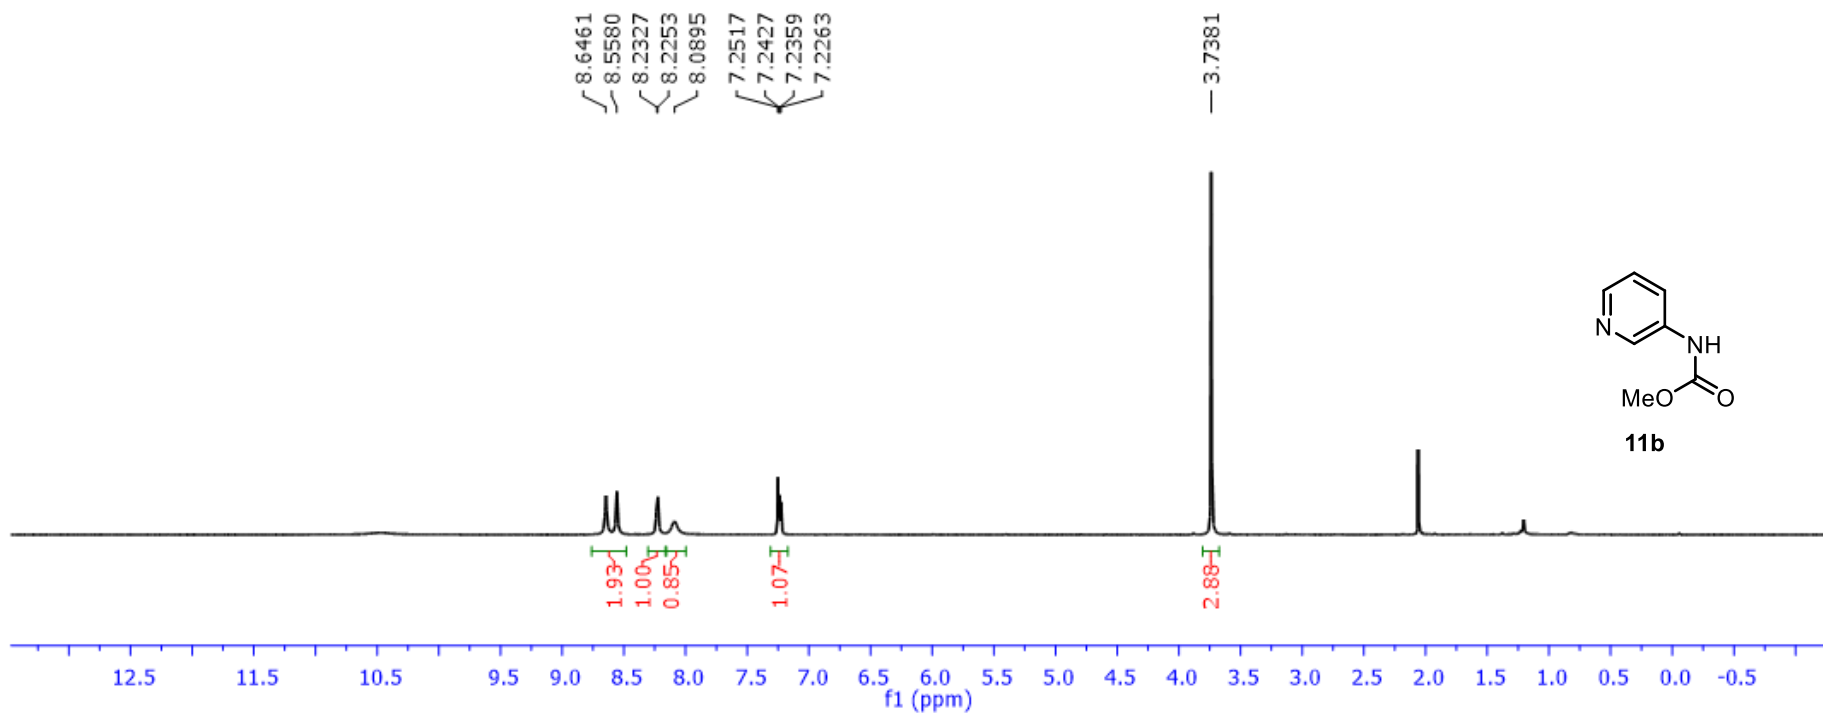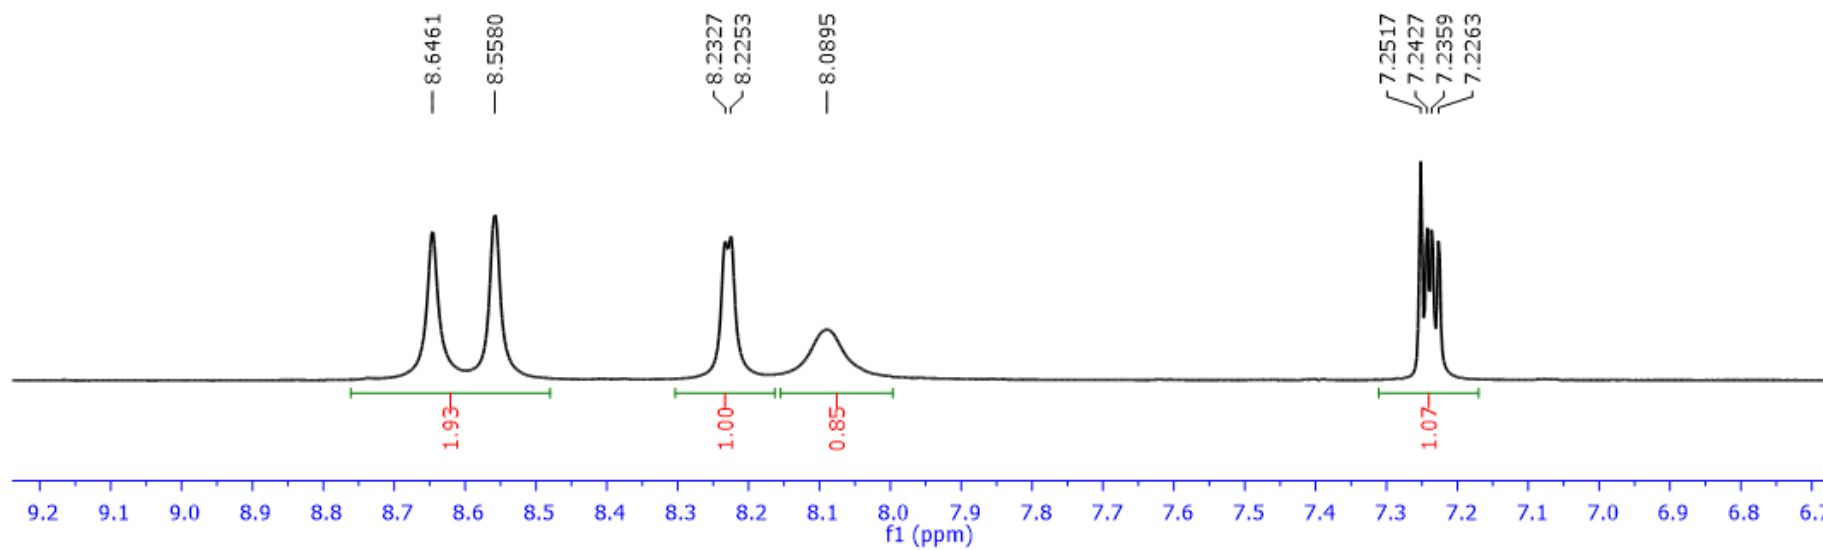

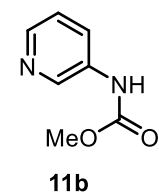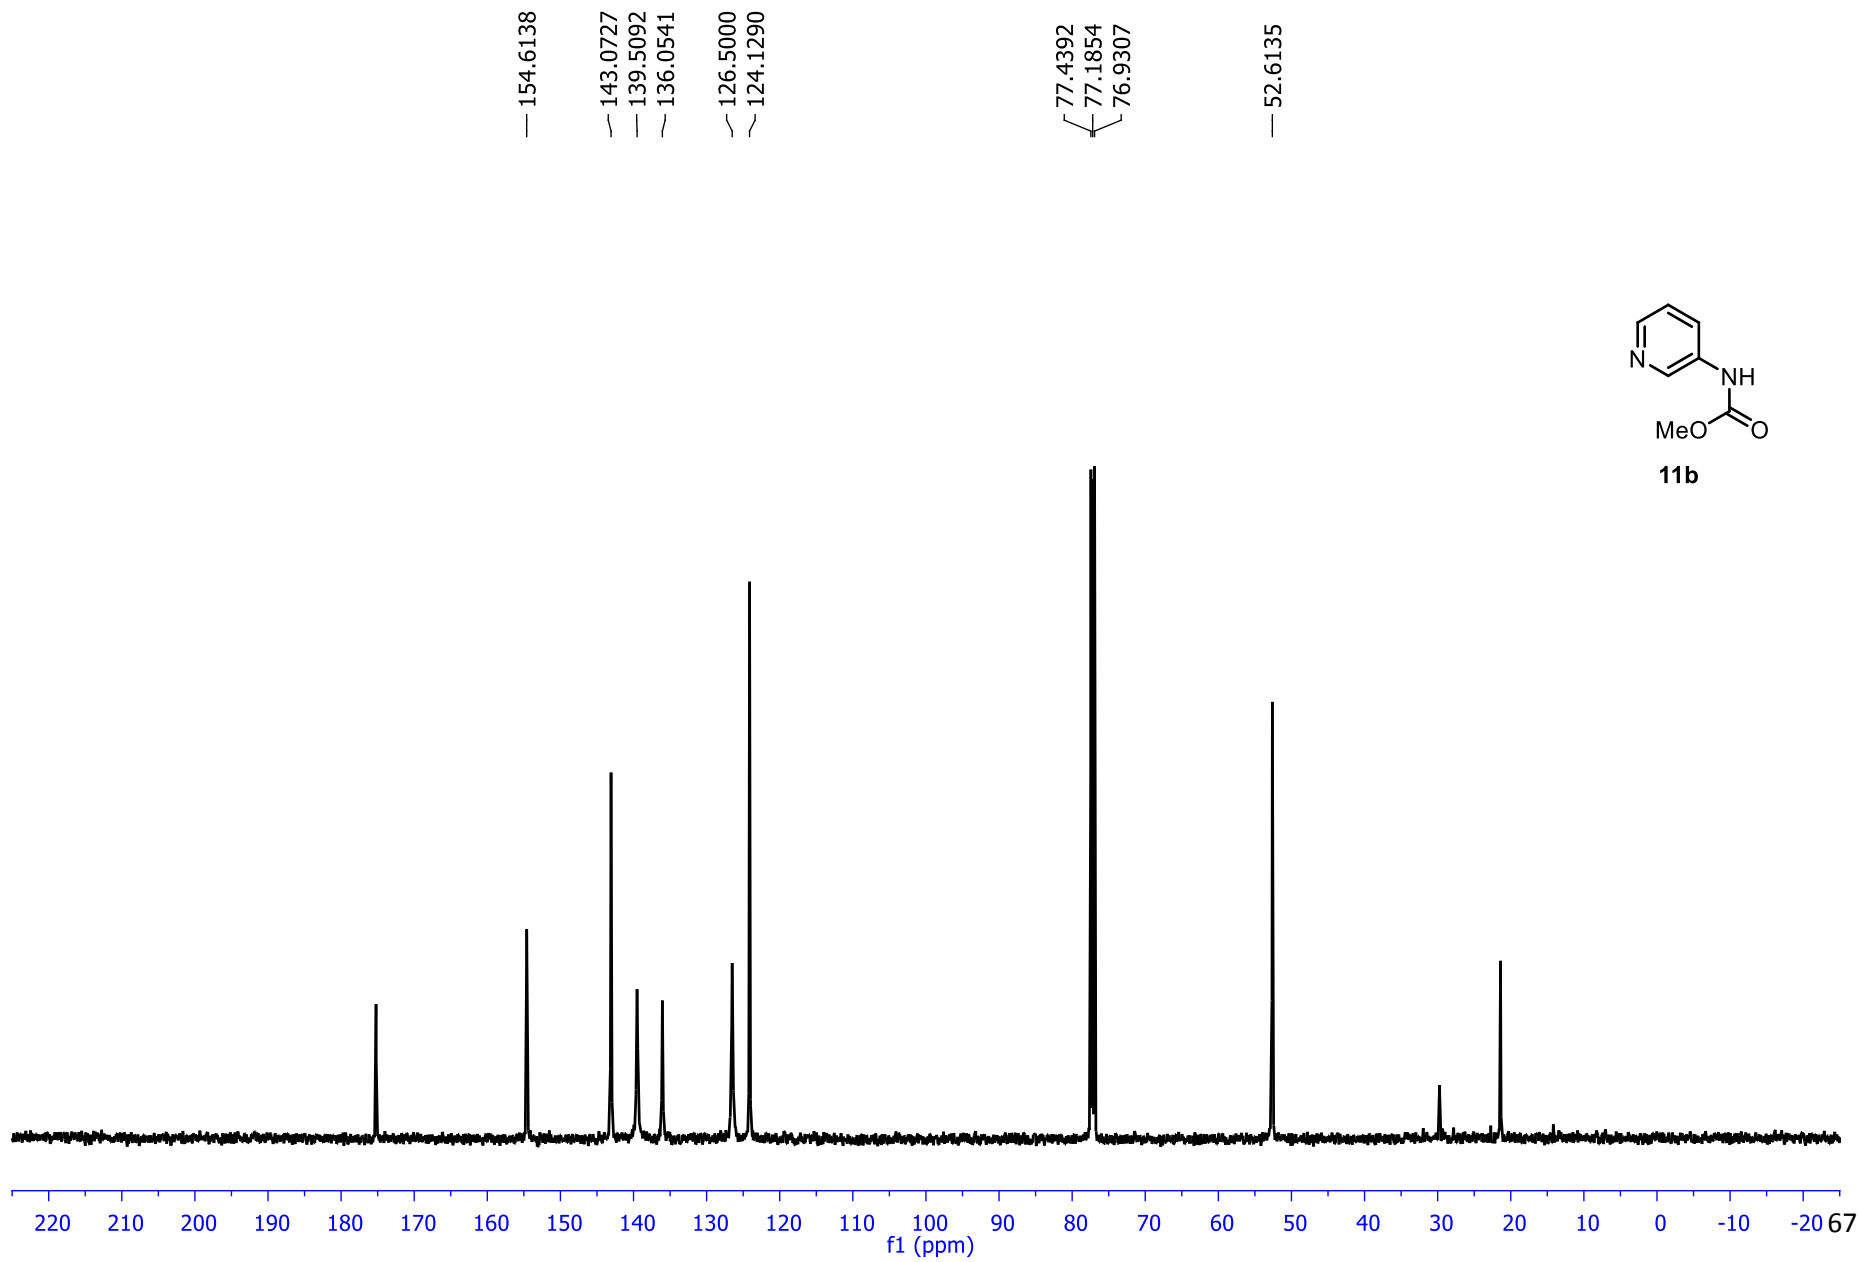

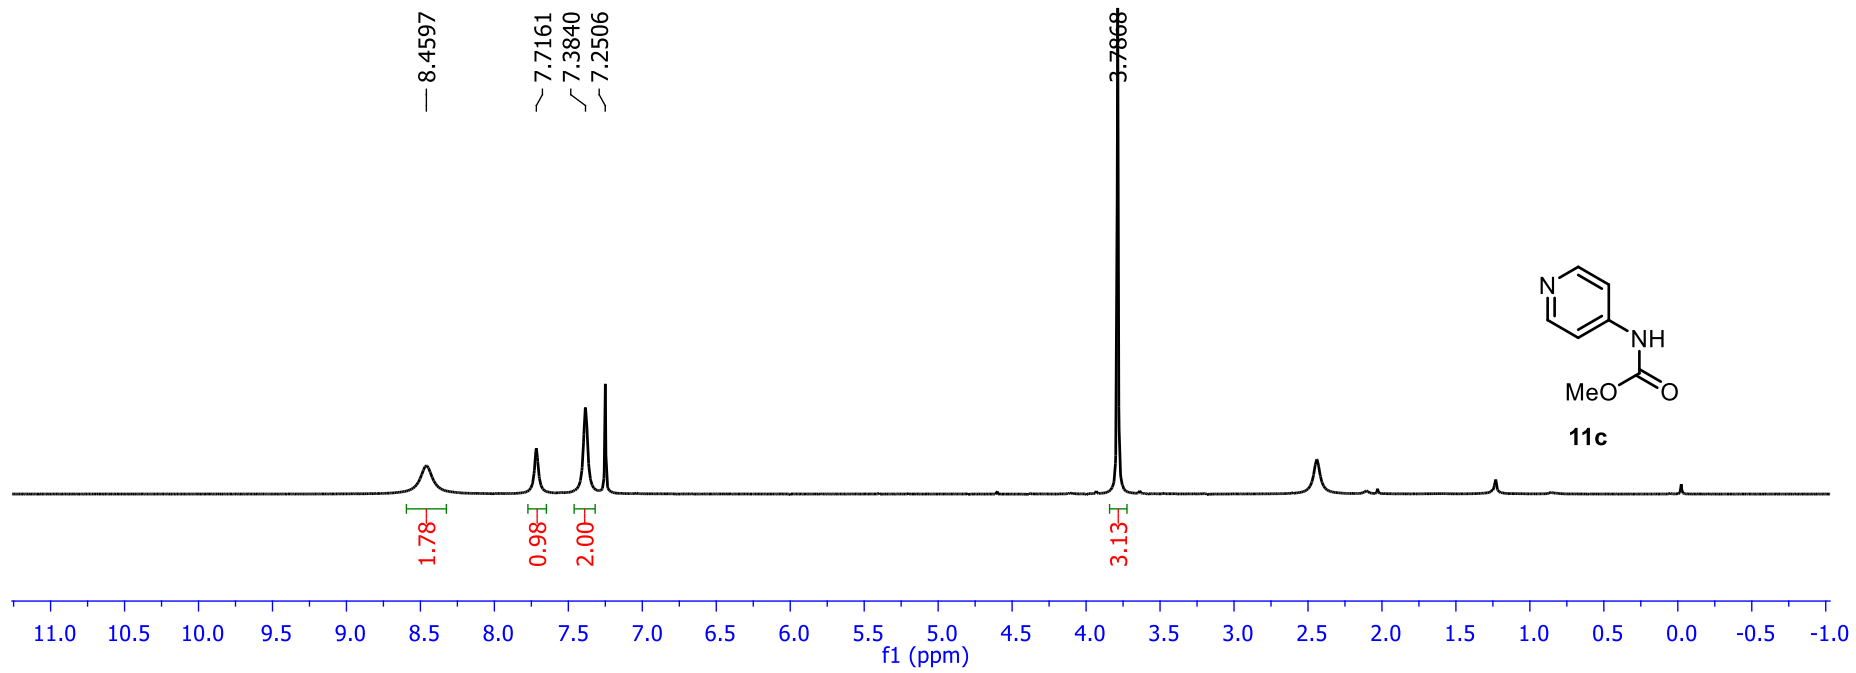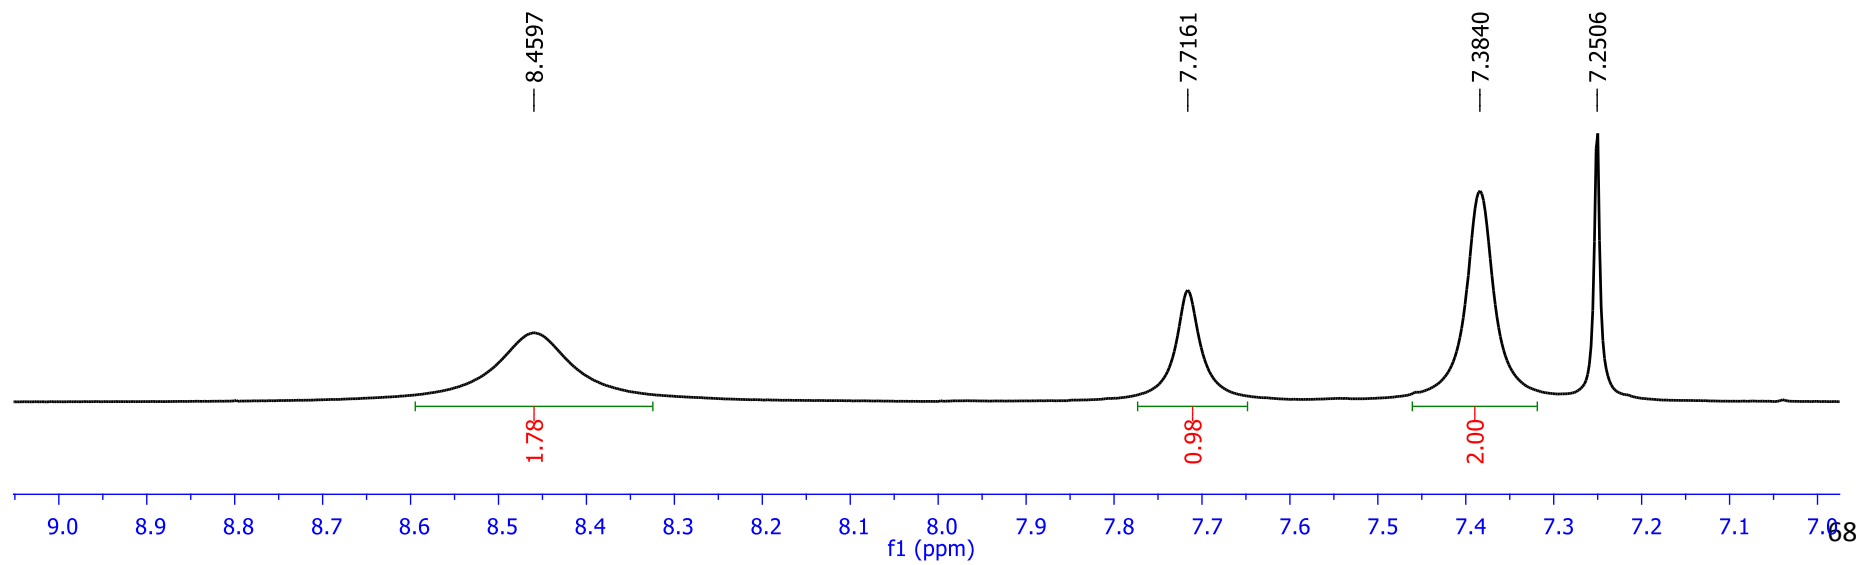

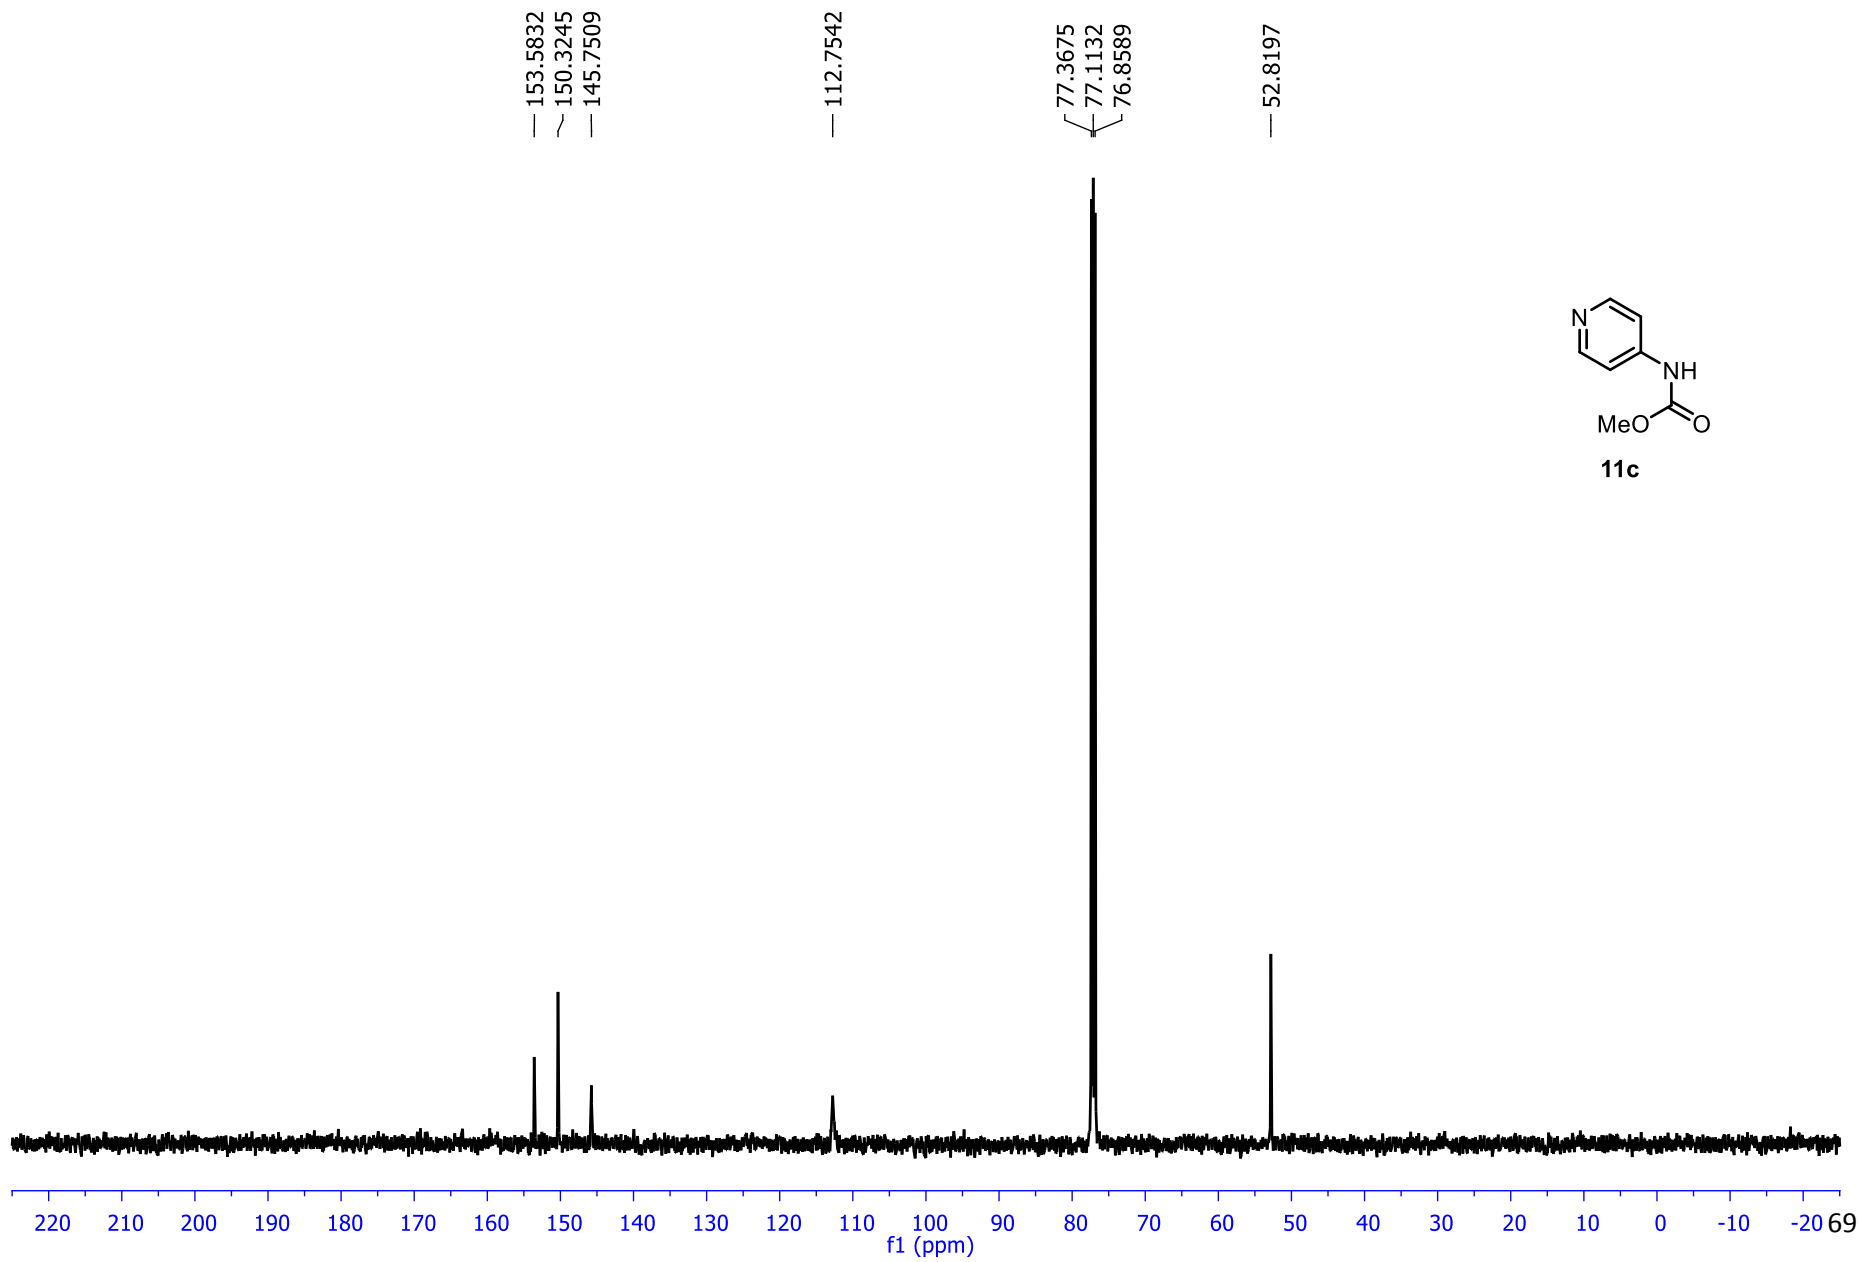

7.9512  
7.8609  
7.8458  
7.6446  
7.6286  
7.5459  
7.5310  
7.5163  
7.4720  
7.4568  
7.4417  
7.3688  
7.3534  
7.3378  
7.2514  
7.1575  
7.1428  
7.1281

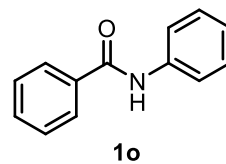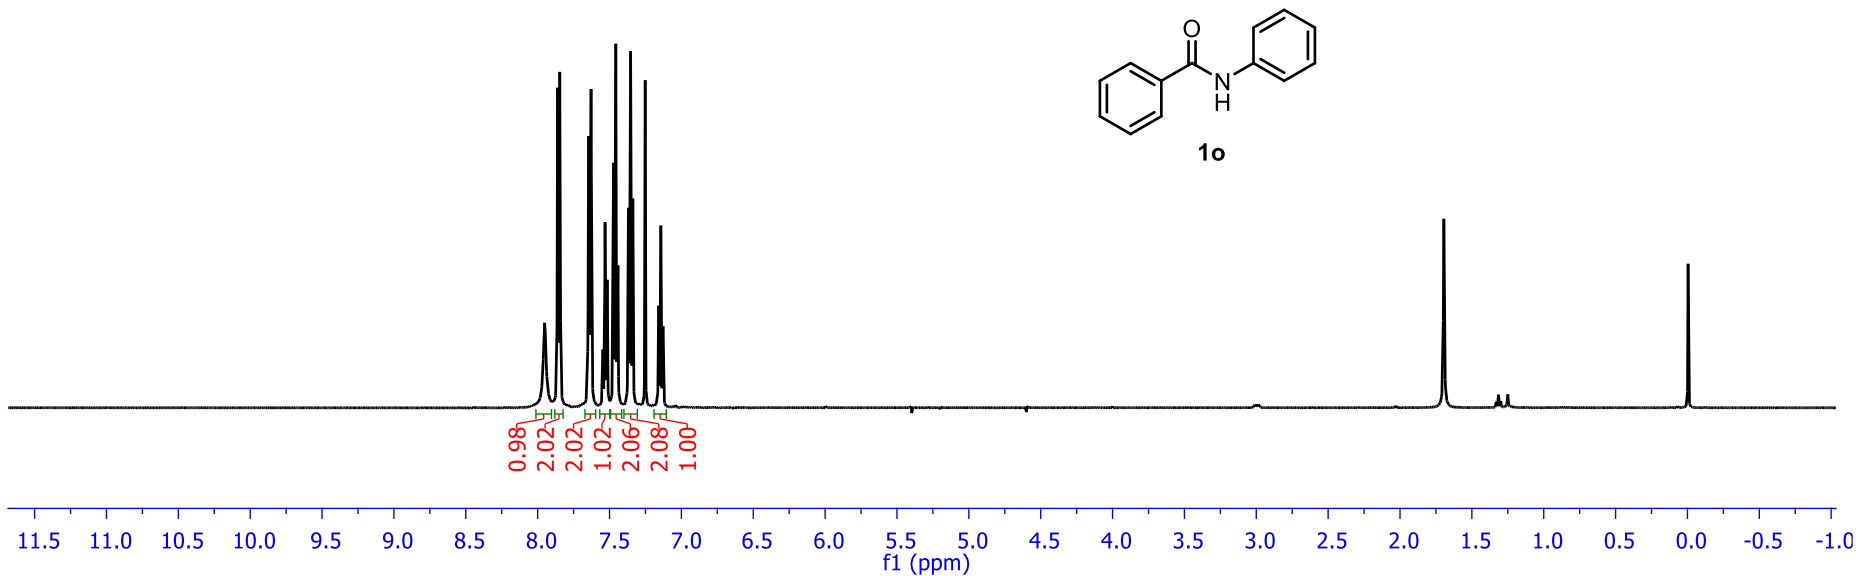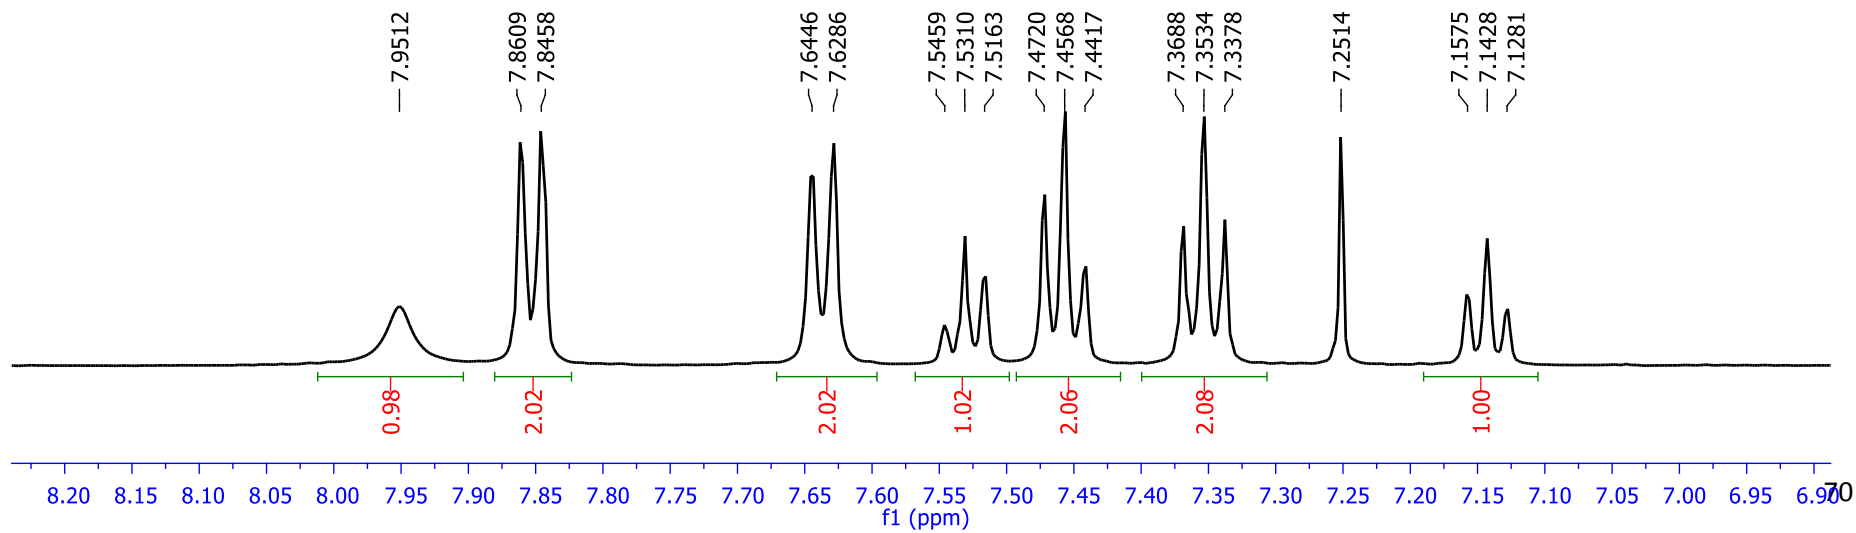

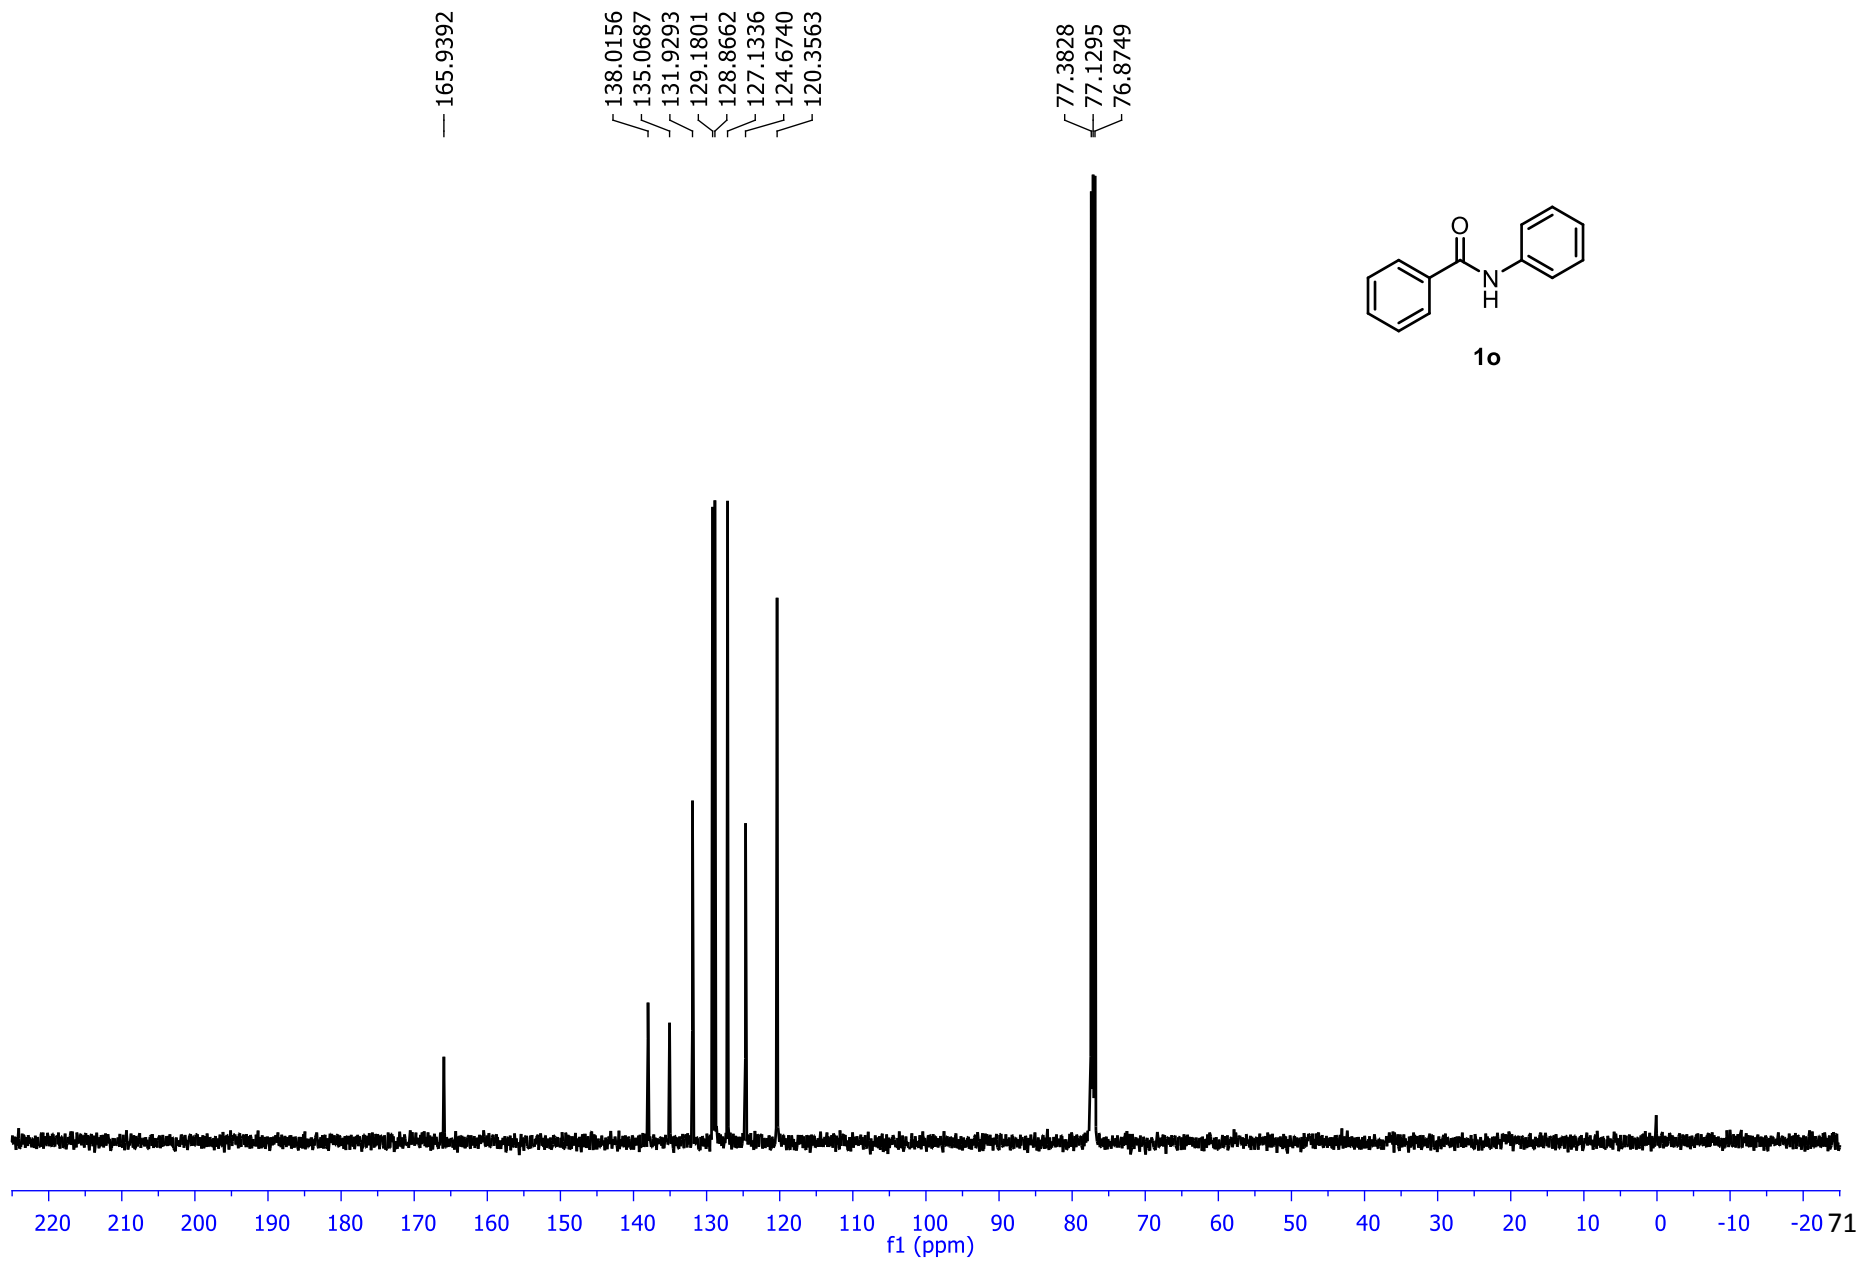

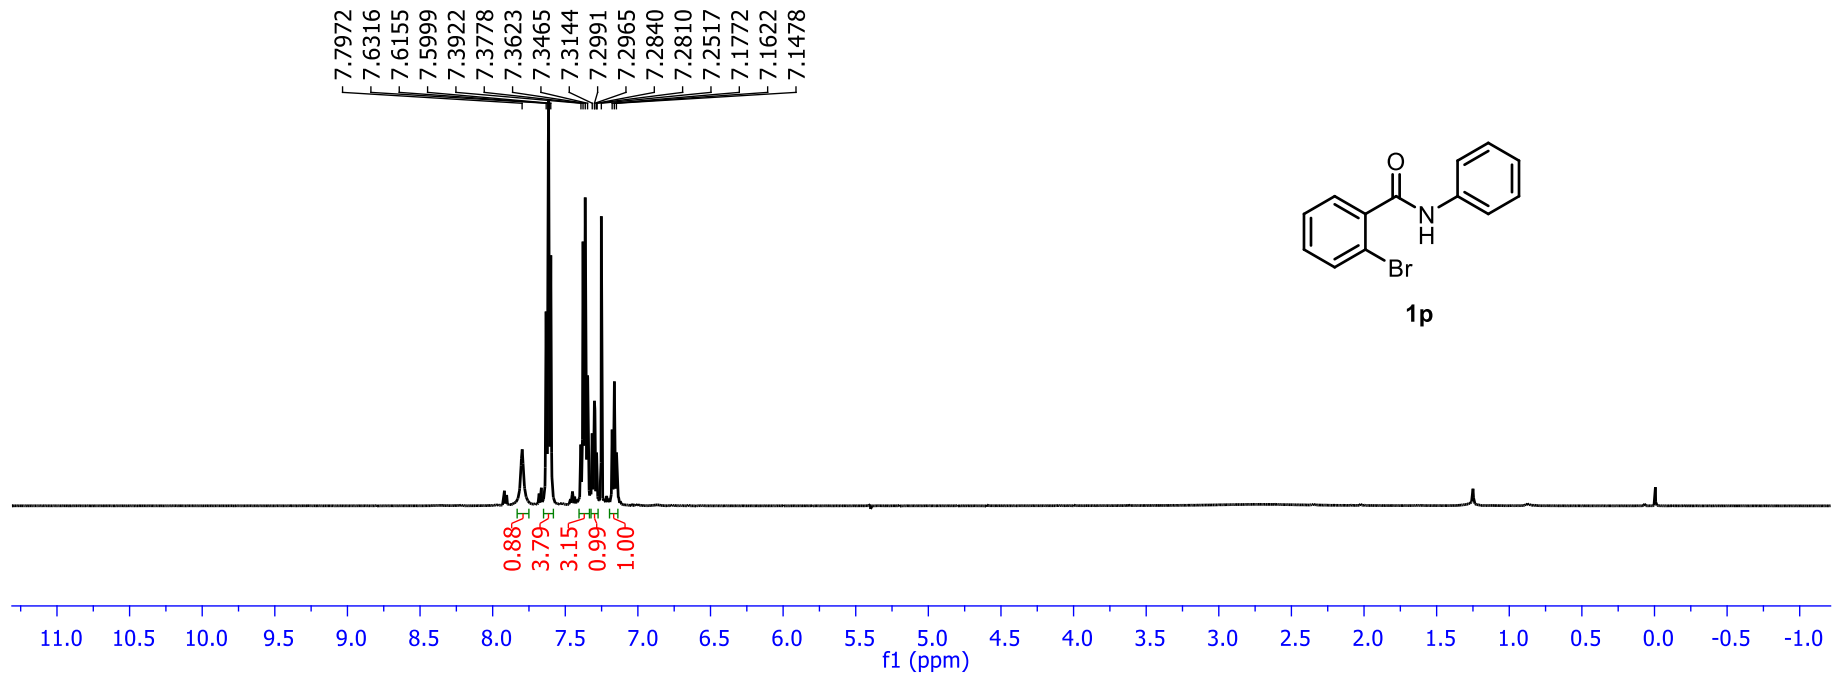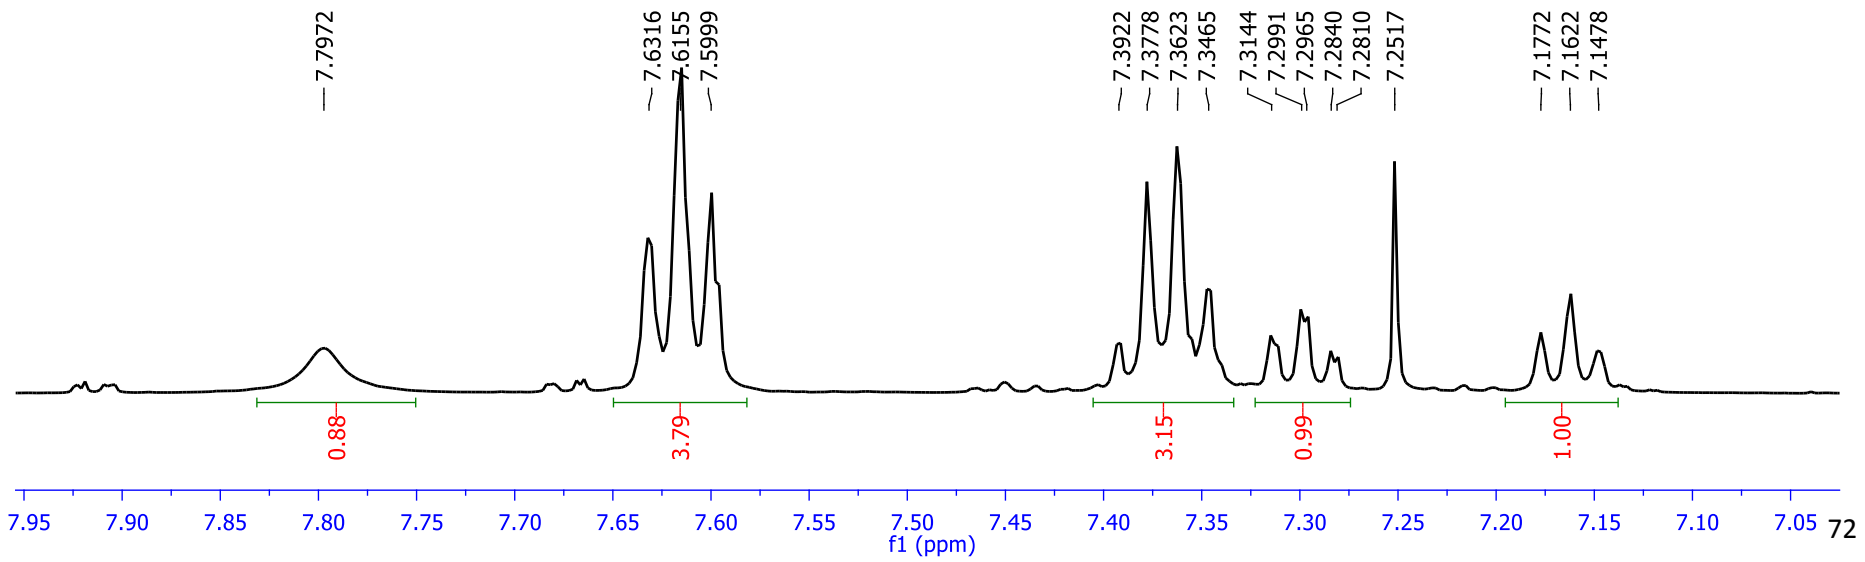



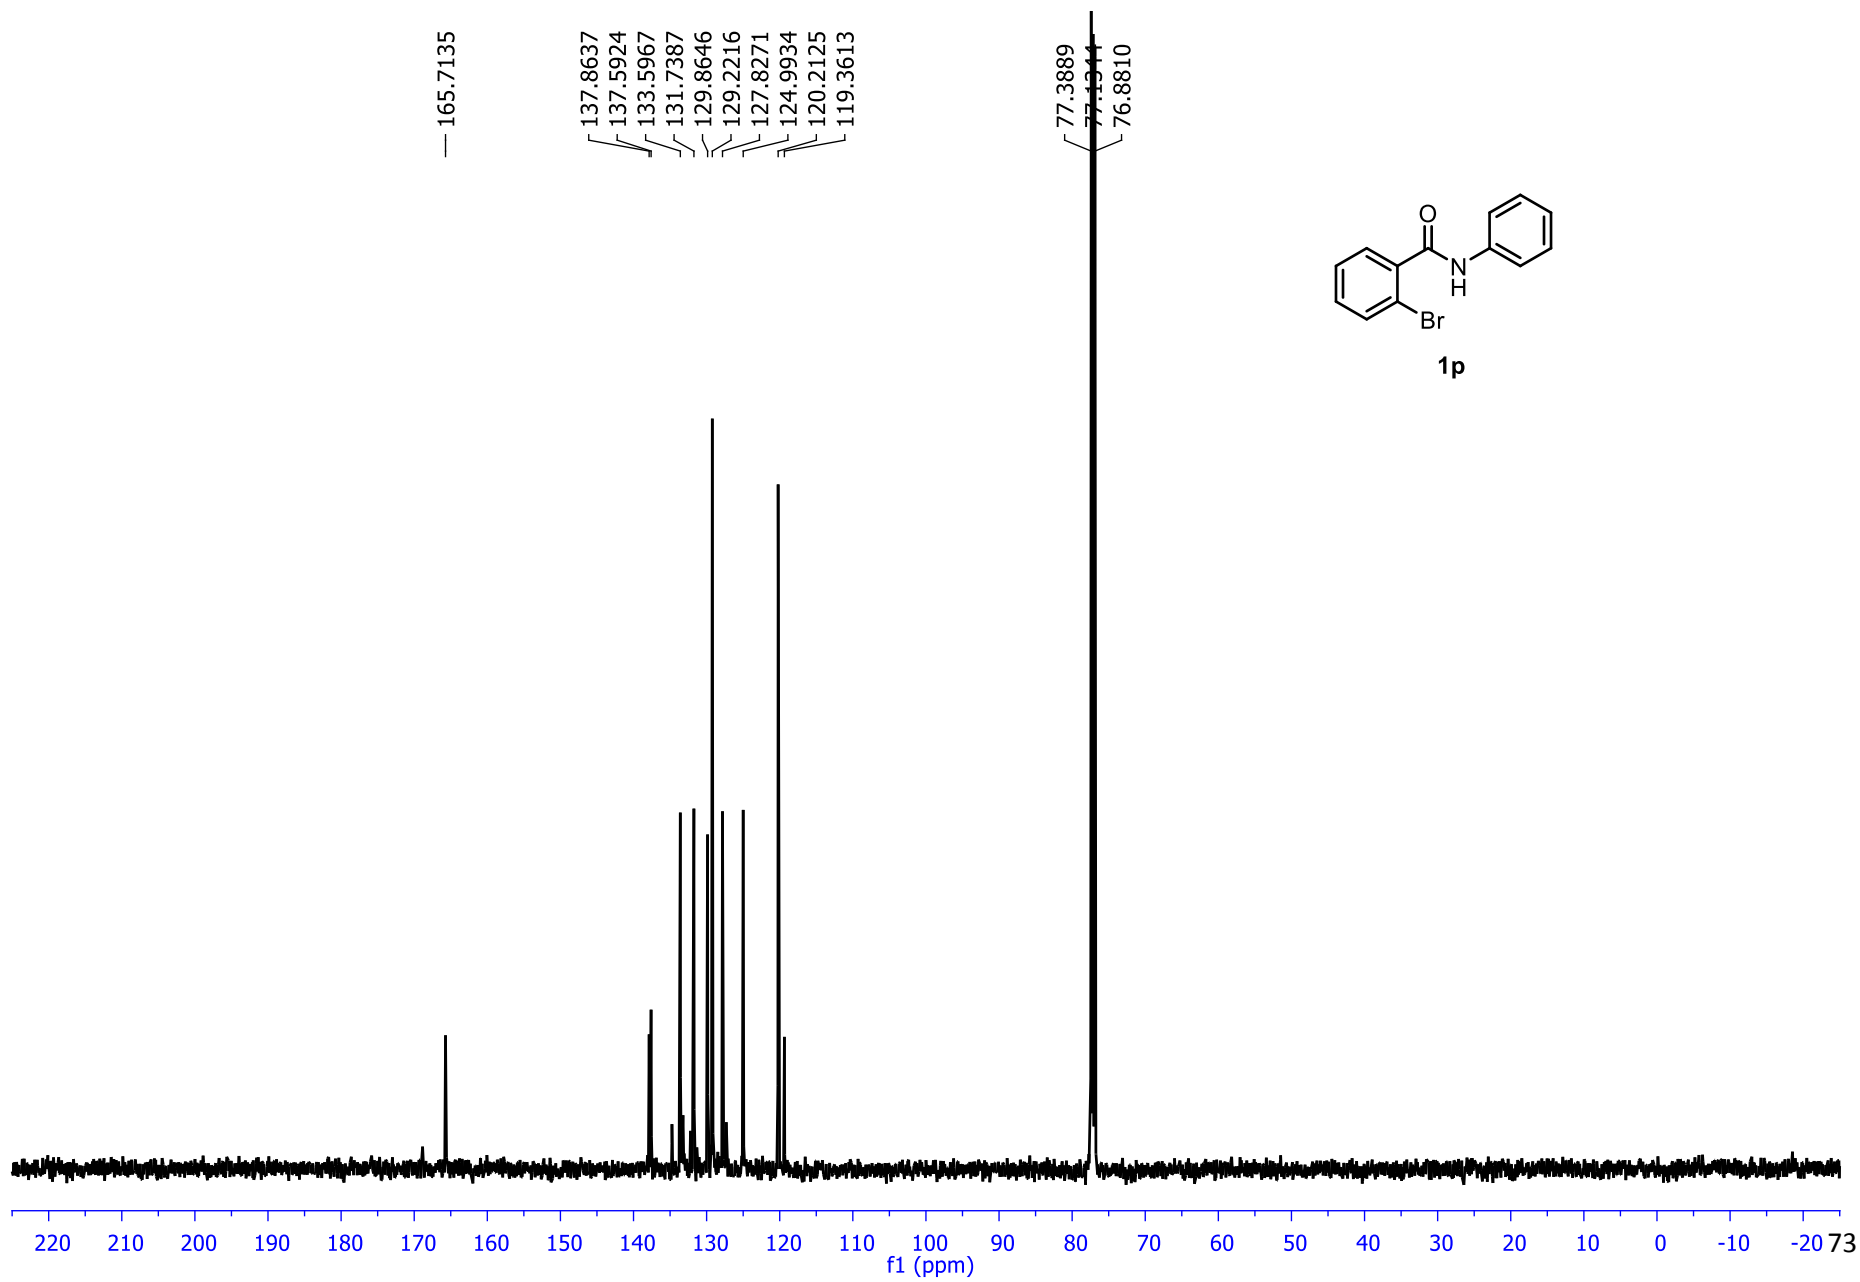

## II. X-ray Data

For the determination of X-ray crystal structure of compound **3k** a single crystal was selected and mounted with paratone oil on a glass fiber using gum. The data was collected at 293 K on a CMOS based Bruker D8 Venture PHOTON 100 diffractometer equipped with a INCOATEC micro-focus source with graphite monochromatic Mo K $\alpha$  radiation ( $\lambda = 0.71073 \text{ \AA}$ ) operation at 50 kV and 30 mA. For the integration of diffraction profiles SAINT program was used. Absorption correction was done applying SADABS program. The crystal structure was solved SIR 92 and refined by full matrix least square method using SHELXL- 97 WinGX system, Ver 1.70.01. All the non-hydrogen atoms in the structure were located the Fourier map and refined anisotropically. The hydrogen atoms were fixed by HFIX in the ideal positions and refined using riding model with isotropic thermal parameters. CIF file is attached with the supporting information.

## Datablock: shelx

---

Bond precision: C-C = 0.0043 A                      Wavelength=0.71073  
Cell:                    a=14.7883(11)        b=5.8469(5)            c=16.4107(16)  
                          alpha=90            beta=115.755(3)       gamma=90  
Temperature:        293 K

|                | Calculated      | Reported        |
|----------------|-----------------|-----------------|
| Volume         | 1278.00(19)     | 1278.00(19)     |
| Space group    | P 21/c          | P 21/c          |
| Hall group     | -P 2ybc         | -P 2ybc         |
| Moiety formula | C13 H10 F3 N3 O | C13 H10 F3 N3 O |
| Sum formula    | C13 H10 F3 N3 O | C13 H10 F3 N3 O |
| Mr             | 281.24          | 281.24          |
| Dx,g cm-3      | 1.462           | 1.462           |
| Z              | 4               | 4               |
| Mu (mm-1)      | 0.126           | 0.126           |
| F000           | 576.0           | 576.0           |
| F000'          | 576.37          |                 |
| h,k,lmax       | 19,7,21         | 19,7,21         |
| Nref           | 3188            | 3115            |
| Tmin,Tmax      | 0.960,0.967     | 0.652,0.746     |
| Tmin'          | 0.960           |                 |

Correction method= # Reported T Limits: Tmin=0.652 Tmax=0.746  
AbsCorr = MULTI-SCAN

Data completeness= 0.977                      Theta(max)= 28.329

R(reflections)= 0.0864( 2317)                wR2(reflections)= 0.2591( 3115)

S = 1.025                                          Npar= 181

---

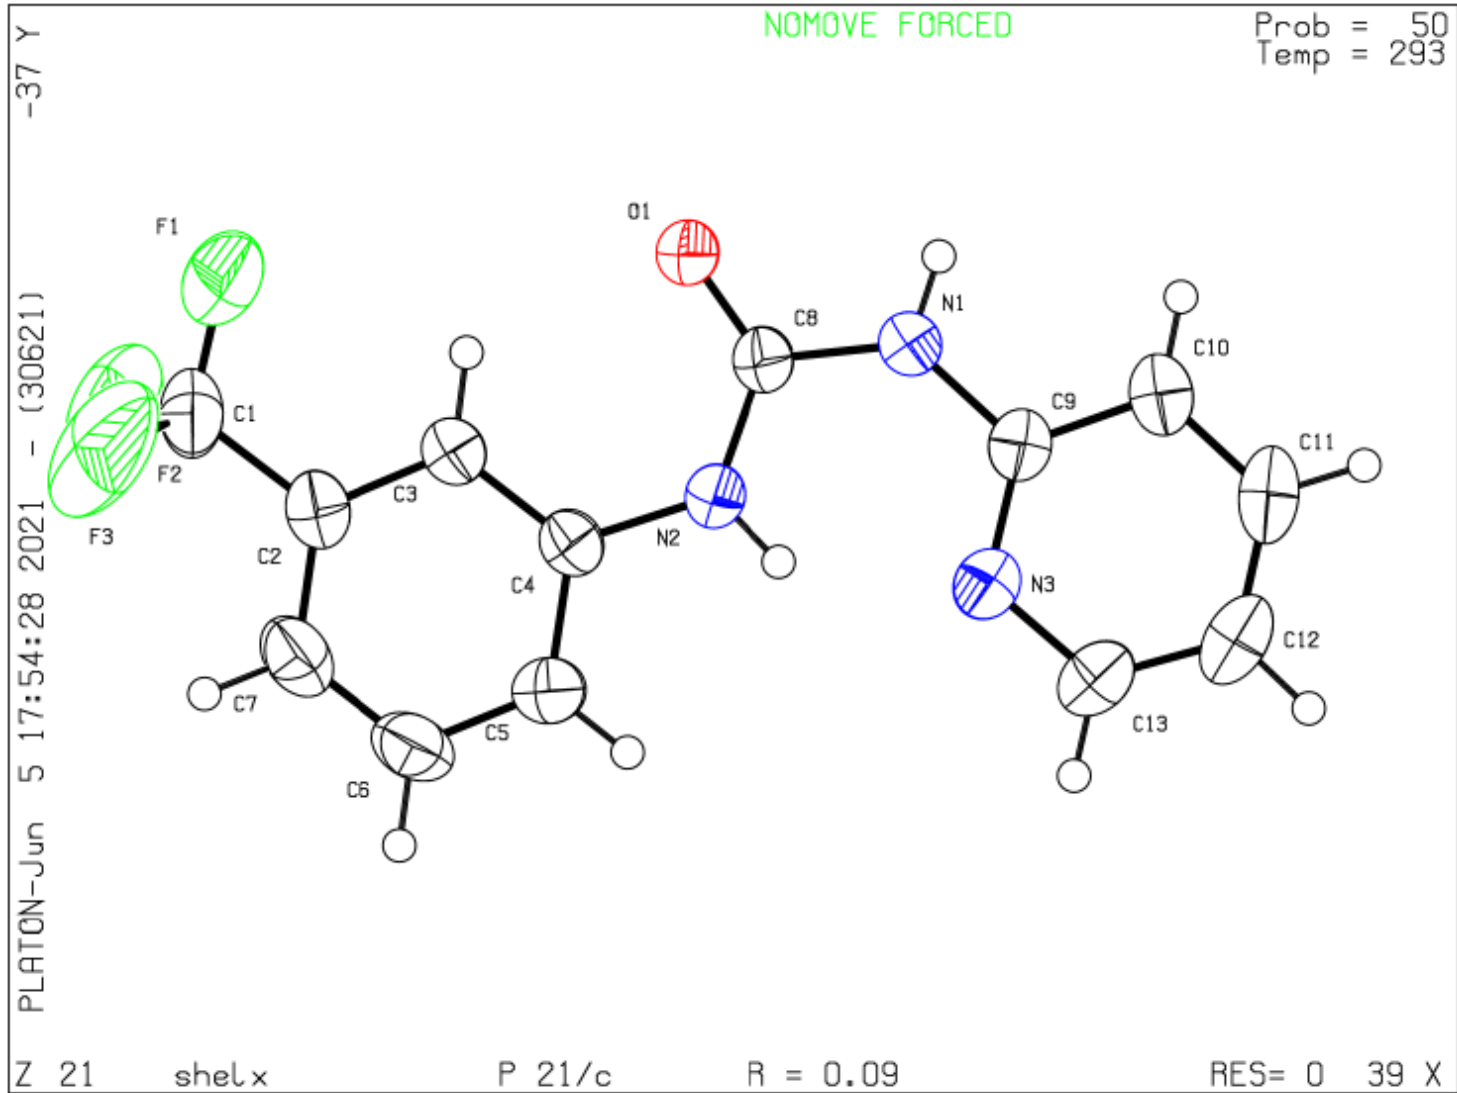

Supplement: d1nj03160k1.pdf [file d1nj03160k1.pdf]
